# Supplementary material for: Synthesis of bis(aryloxy)fluoromethanes using a heterodihalocarbene strategy
Source: publisher site journal article supplement (doi:10.3762/bjoc.17.70), 2021-04-12
Supplement: Additional file 2 [file 1860-5397-17-70-S2.pdf]

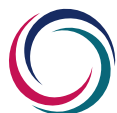

## Supporting Information

for

### Synthesis of bis(aryloxy)fluoromethanes using a heterodihalocarbene strategy

Carl Recsei and Yaniv Barda

*Beilstein J. Org. Chem.* **2021**, *17*, 813–818. [doi:10.3762/bjoc.17.70](https://doi.org/10.3762/bjoc.17.70)

## Copies of NMR spectra

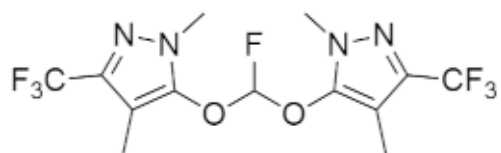

7.272

6.476  
6.292

3.752  
3.673

2.075  
2.039  
1.998  
1.669

0.000

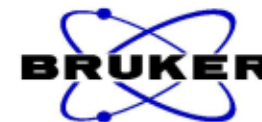

```

NAME          P7K8.12.19
EXPNO         1
PROCNO        1
Date_         20191208
Time          13.13
INSTRUM       spect
PROBHD        5 mm PABBO BB-
PULPROG       zg30
TD            65536
SOLVENT       CDCl3
NS            24
DS            0
SWH           7183.908 Hz
FIDRES        0.109618 Hz
AQ            4.5613556 sec
RG            128
DW            69.600 usec
DE            6.50 usec
TE            300.0 K
D1            0.10000000 sec
TD0           1
  
```

```

===== CHANNEL f1 =====
NUC1          1H
P1            10.10 usec
PL1           0.00 dB
SFO1          400.1032008 MHz
SI            32768
SF            400.1000058 MHz
WDW           FM
SSB           0
LB            0.00 Hz
GB            0
PC            1.00
  
```

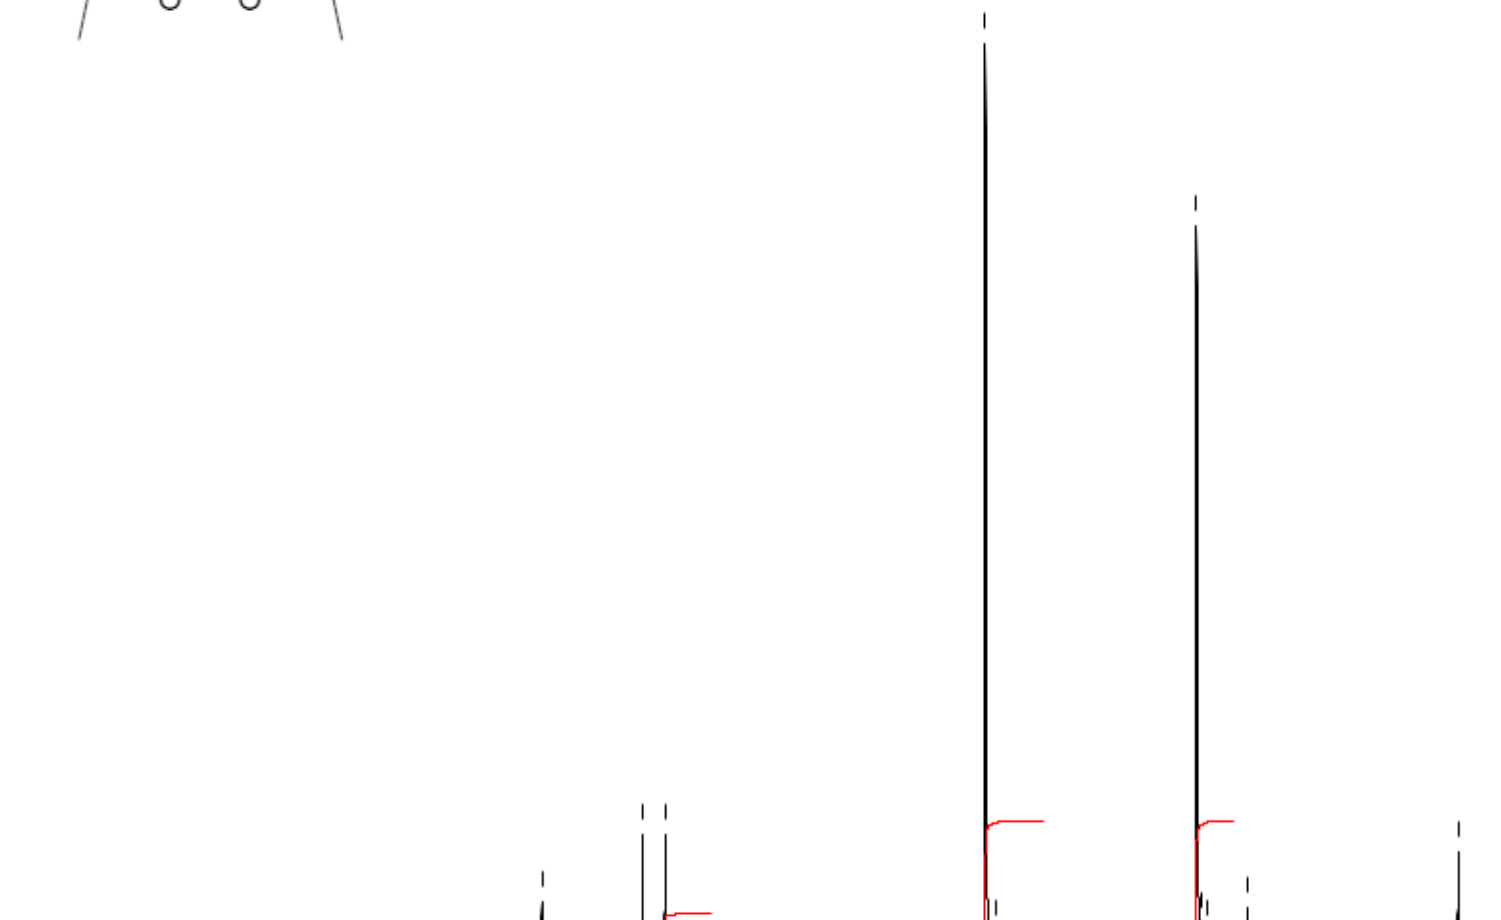

1.000

6.005

6.022

11 10 9 8 7 6 5 4 3 2 1 ppm  
Scale: 0.6 ppm/cm, 240.1 Hz/cm



143.769  
139.864  
139.497  
139.129  
138.759  
125.343  
122.667  
119.989  
117.314  
116.754  
114.135  
103.576

77.401  
77.083  
76.766

35.554

6.559  
-0.001

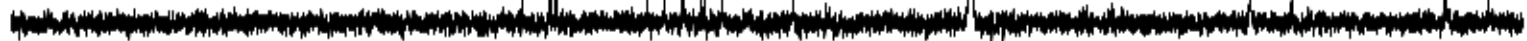

200 180 160 140 120 100 80 60 40 20 ppm

Scale: 11.25 ppm/cm, 1132 Hz/cm

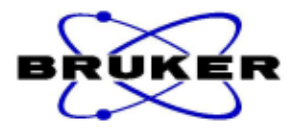

```

NAME          P7K8.12.19
EXPNO         6
PROCNO        1
Date_         20191209
Time          10.45
INSTRUM       spect
PROBHD        5 mm PABBO BB-
PULPROG       zgdc30
TD            32768
SOLVENT       CDC13
NS            6076
DS            0
SWH           24154.590 Hz
FIDRES        0.737140 Hz
AQ            0.6783476 se
RG            71.8
DW            20.700 us
DE            29.57 us
TE            301.1 K
D1            0.10000000 se
D11           0.03000000 se
TD0           1
  
```

```

===== CHANNEL f1 =====
NUC1          13C
P1            9.20 us
PL1           3.00 dE
SFO1          100.6152865 MHz
  
```

```

===== CHANNEL f2 =====
CPDPRG2       waltz16
NUC2           1H
PCPD2         80.00 us
PL2            0.00 dE
PL12          18.00 dE
SFO2          400.1009202 MHz
SI            32768
SF            100.6052174 MHz
WDW            EM
SSB            0
LB             2.00 Hz
GB             0
PC             1.00
  
```

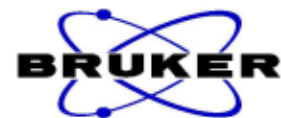

NAME P7K8.12.19  
EXPNO 5  
PROCNO 1  
Date\_ 20191208  
Time 13.59  
INSTRUM spect  
PROBHD 5 mm PABBO BB-  
PULPROG zg30  
TD 32768  
SOLVENT CDCl3  
NS 8  
DS 0  
SWH 15060.241 Hz  
FIDRES 0.459602 Hz  
AQ 1.0879476 se  
RG 1149.4  
DW 33.200 us  
DE 6.32 us  
TE 300.0 K  
D1 0.10000000 se  
TD0 1

===== CHANNEL f1 =====  
NUC1 19F  
P1 7.90 us  
PL1 0.00 dB  
SFO1 376.4419017 MHz  
SI 32768  
SF 376.4703092 MHz  
WDW EM  
SSB 0  
LB 0.50 Hz  
GB 0  
PC 1.00

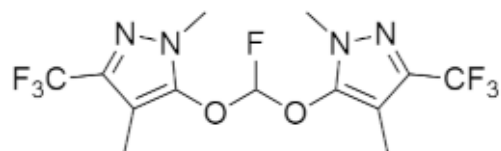

--82.28  
--82.47

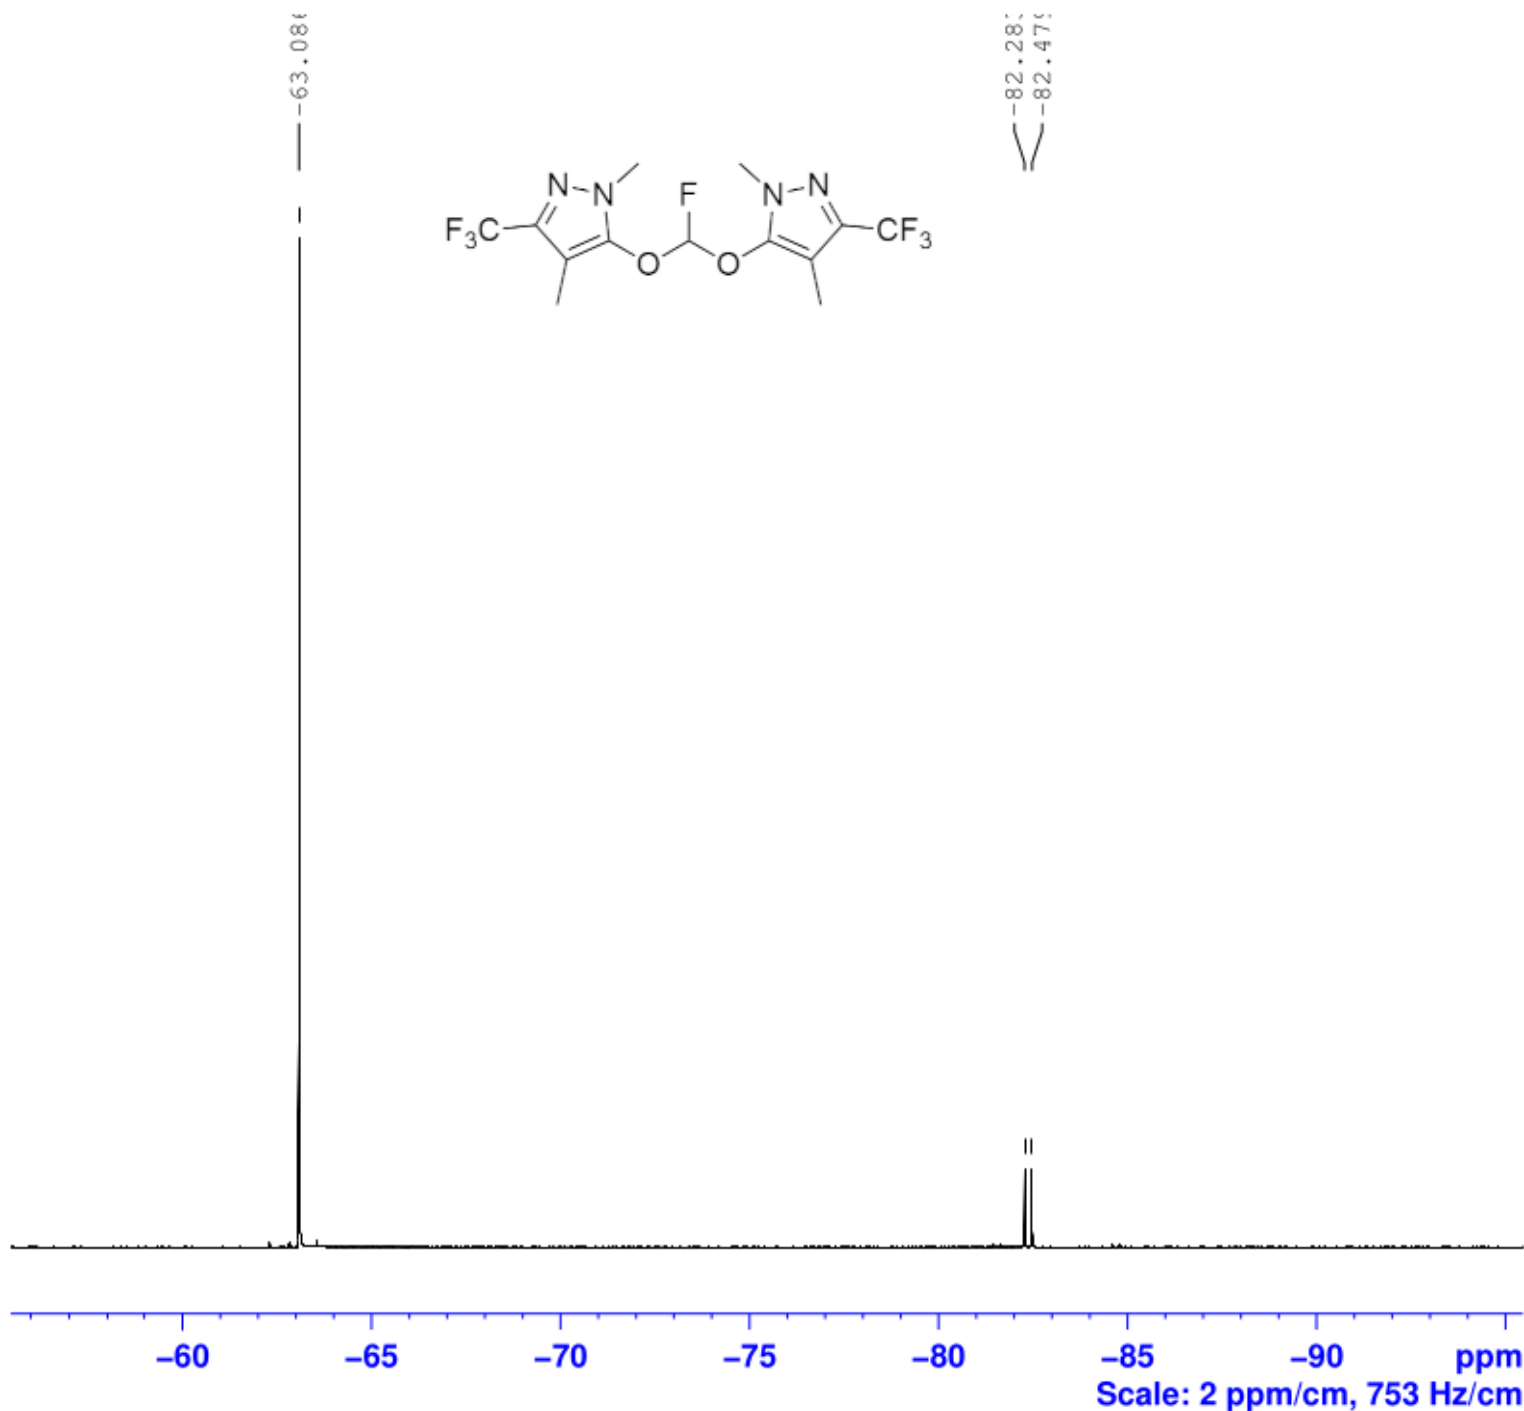

# HMBC

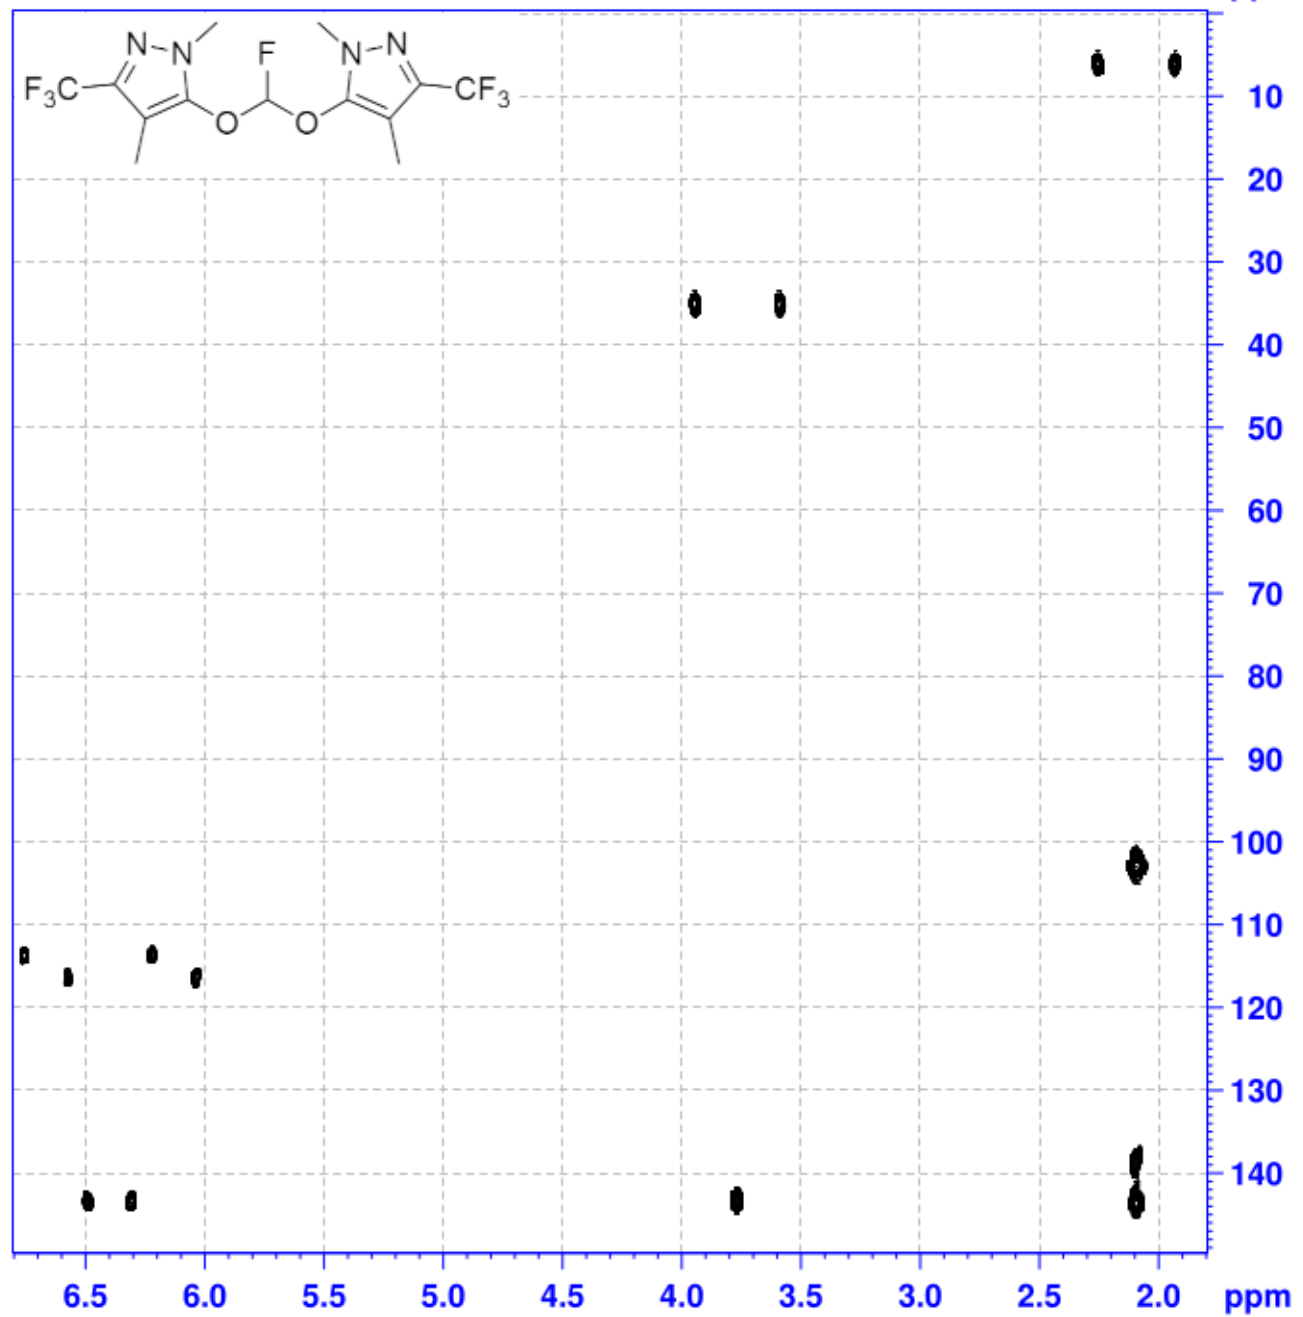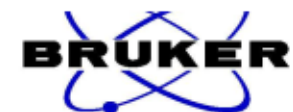

```

NAME          F7K8.12.19
EXPNO         4
PROCNO        1
Date_         20191208
Time          13.49
INSTRUM       spect
PROBHD        5 mm PABBO BB-
PULPROG       hmbcqp1pndqf
TD            1024
SOLVENT       CDC13
NS            4
DS            2
SWH           2003.205 Hz
FIDRES        1.956255 Hz
AQ            0.2556404 sec
RG            46341
DW            249.600 usec
DE            241.25 usec
TE            300.1 K
CNST2         145.0000000
CNST13        8.0000000
D0            0.00000300 sec
D1            1.00000000 sec
D2            0.00344828 sec
D6            0.06250000 sec
D16           0.00020000 sec
INO           0.00003315 sec

----- CHANNEL f1 -----
NUC1          1H
P1            10.10 usec
P2            20.20 usec
PL1           0.00 dB
SFO1          400.1017204 MHz

----- CHANNEL f2 -----
NUC2          13C
P3            9.20 usec
PL2           0.00 dB
SFO2          100.6127714 MHz

===== GRADIENT CHANNEL =====
GPNAM1       sine.100
GPNAM2       sine.100
GPNAM3       sine.100
GPZ1         50.00 %
GPZ2         30.00 %
GPZ3         40.10 %
PL6          1000.00 usec
ND0          2
TD           67
SFO1         100.6128 MHz
FIDRES       225.252472 Hz
SW           150.000 ppm
FnMODE       QF
SI           1024
SF           400.1000005 MHz
WDW          QSINE
SSB          0
LB           0.00 Hz
GB           0
PC           1.00
SI           512
MC2          QF
SF           100.6052572 MHz
WDW          QSINE
SSB          0
LB           0.00 Hz
GB           0
    
```

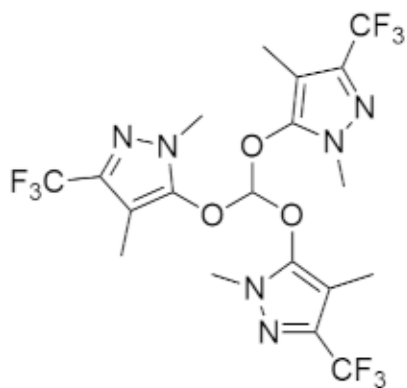

contains ca. 5% Compound 4

7.268

6.452

6.304

5.951

3.744

2.074

1.833

1.831

0.074

-0.000

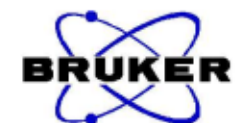

Current Data Parameters  
 NAME P7K1.12.20  
 EXPNO 1  
 PROCNO 1

F2 - Acquisition Parameters  
 Date\_ 20201201  
 Time\_ 10.26 h  
 INSTRUM spect  
 PROBHD 28420\_0082 (PH  
 PULPROG zg30  
 TD 65536  
 SOLVENT CDCl3  
 NS 16  
 DS 0  
 SWH 7002.801 Hz  
 FIDRES 0.213709 Hz  
 AQ 4.6792703 sec  
 RG 322  
 DW 71.400 usec  
 DE 6.50 usec  
 TE 300.0 K  
 D1 0.10000000 sec  
 TD0 1  
 SFO1 500.0430002 MHz  
 NUC1 1H  
 P1 10.32 usec  
 PLW1 15.00000000 W

F2 - Processing parameters  
 SI 65536  
 SF 500.0400079 MHz  
 WDW EM  
 SSB 0  
 LB 0 Hz  
 GB 0  
 PC 1.00

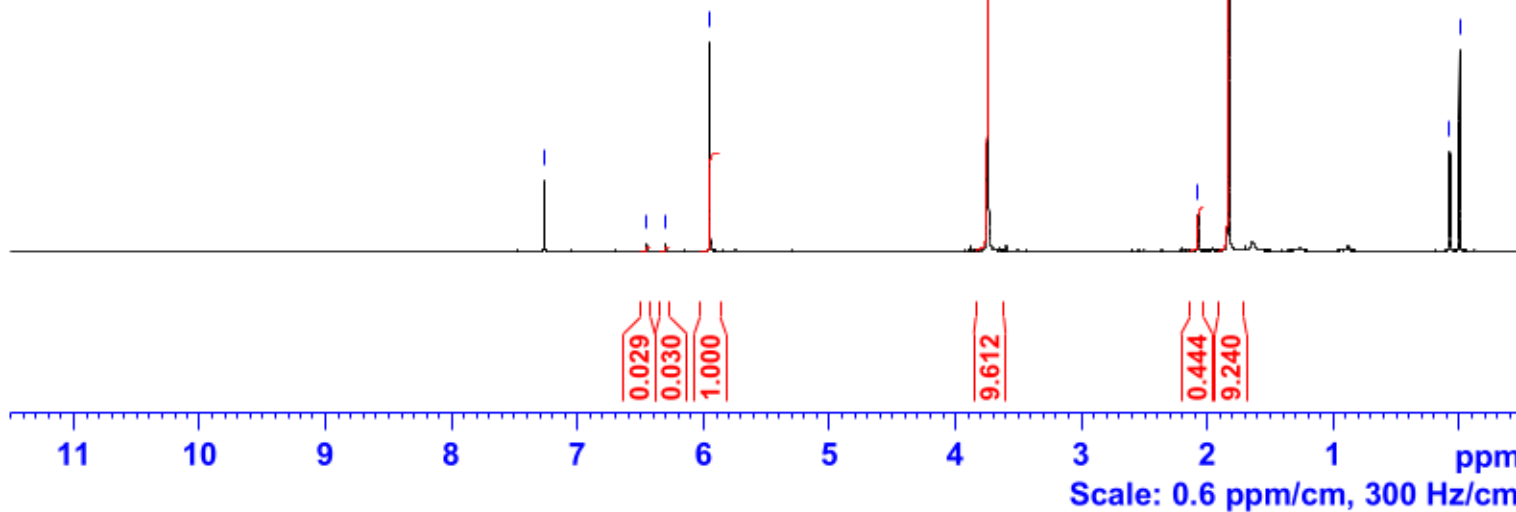

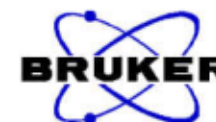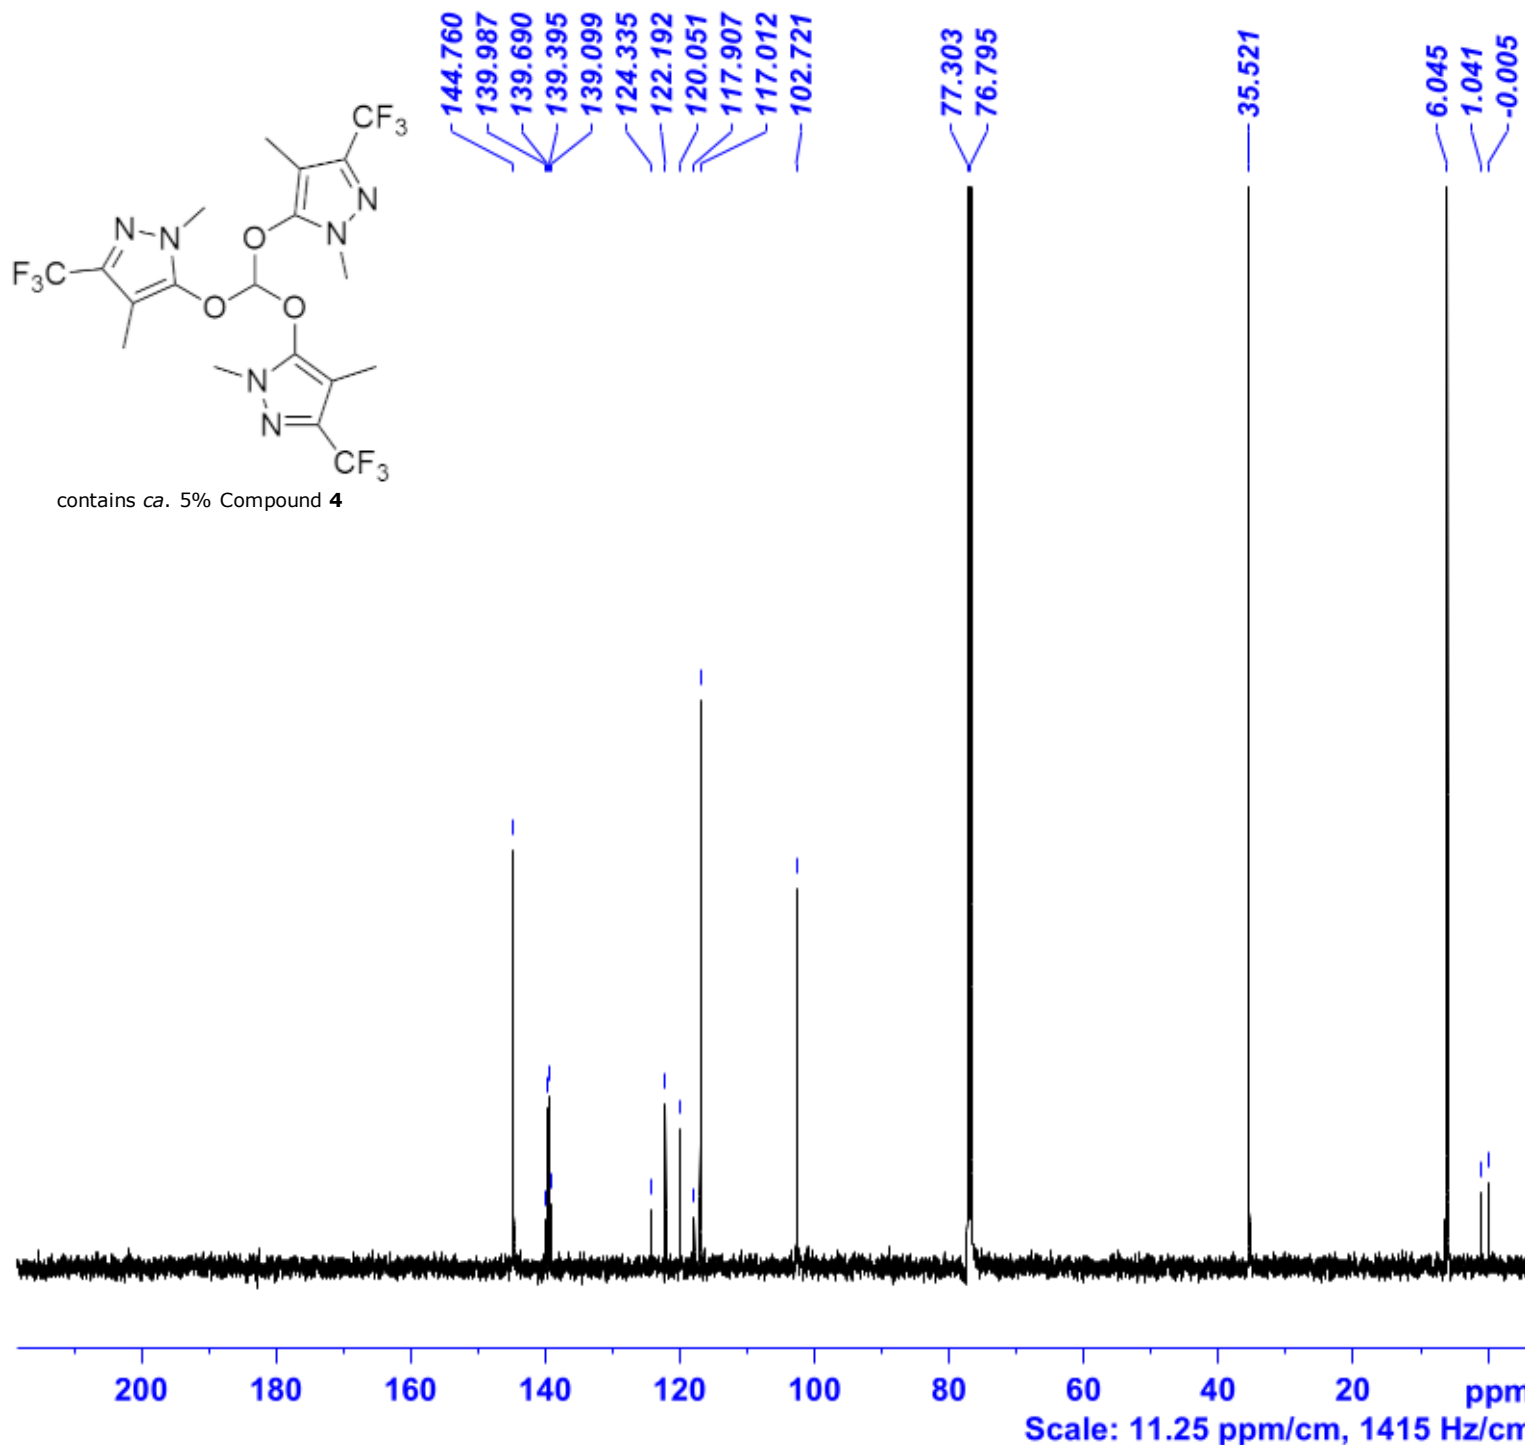

Current Data Parameters  
NAME P7K1.12.20  
EXPNO 2  
PROCNO 1

F2 - Acquisition Parameters  
Date\_ 20201201  
Time\_ 10.49 h  
INSTRUM spect  
PROBHD Z8420\_0082 (PH  
PULPROG zgdc30  
TD 65536  
SOLVENT CDCl3  
NS 1046  
DS 0  
SWH 29761.904 Hz  
FIDRES 0.908261 Hz  
AQ 1.1010048 sec  
RG 2050  
DW 16.800 usec  
DE 6.50 usec  
TE 300.0 K  
D1 0.10000000 sec  
D11 0.03000000 sec  
TD0 1  
SFO1 125.7477315 MHz  
NUC1 13C  
P1 13.00 usec  
PLW1 55.00000000 W  
SFO2 500.0425002 MHz  
NUC2 1H  
CPDPRG[2] waltz16  
PCPD2 80.00 usec  
PLW2 15.00000000 W  
PLW12 0.24962001 W

F2 - Processing parameters  
SI 32768  
SF 125.7351531 MHz  
WDW EM  
SSB 0  
LB 2.00 Hz  
GB 0  
PC 1.00

contains ca. 5% Compound 4

# HMBC

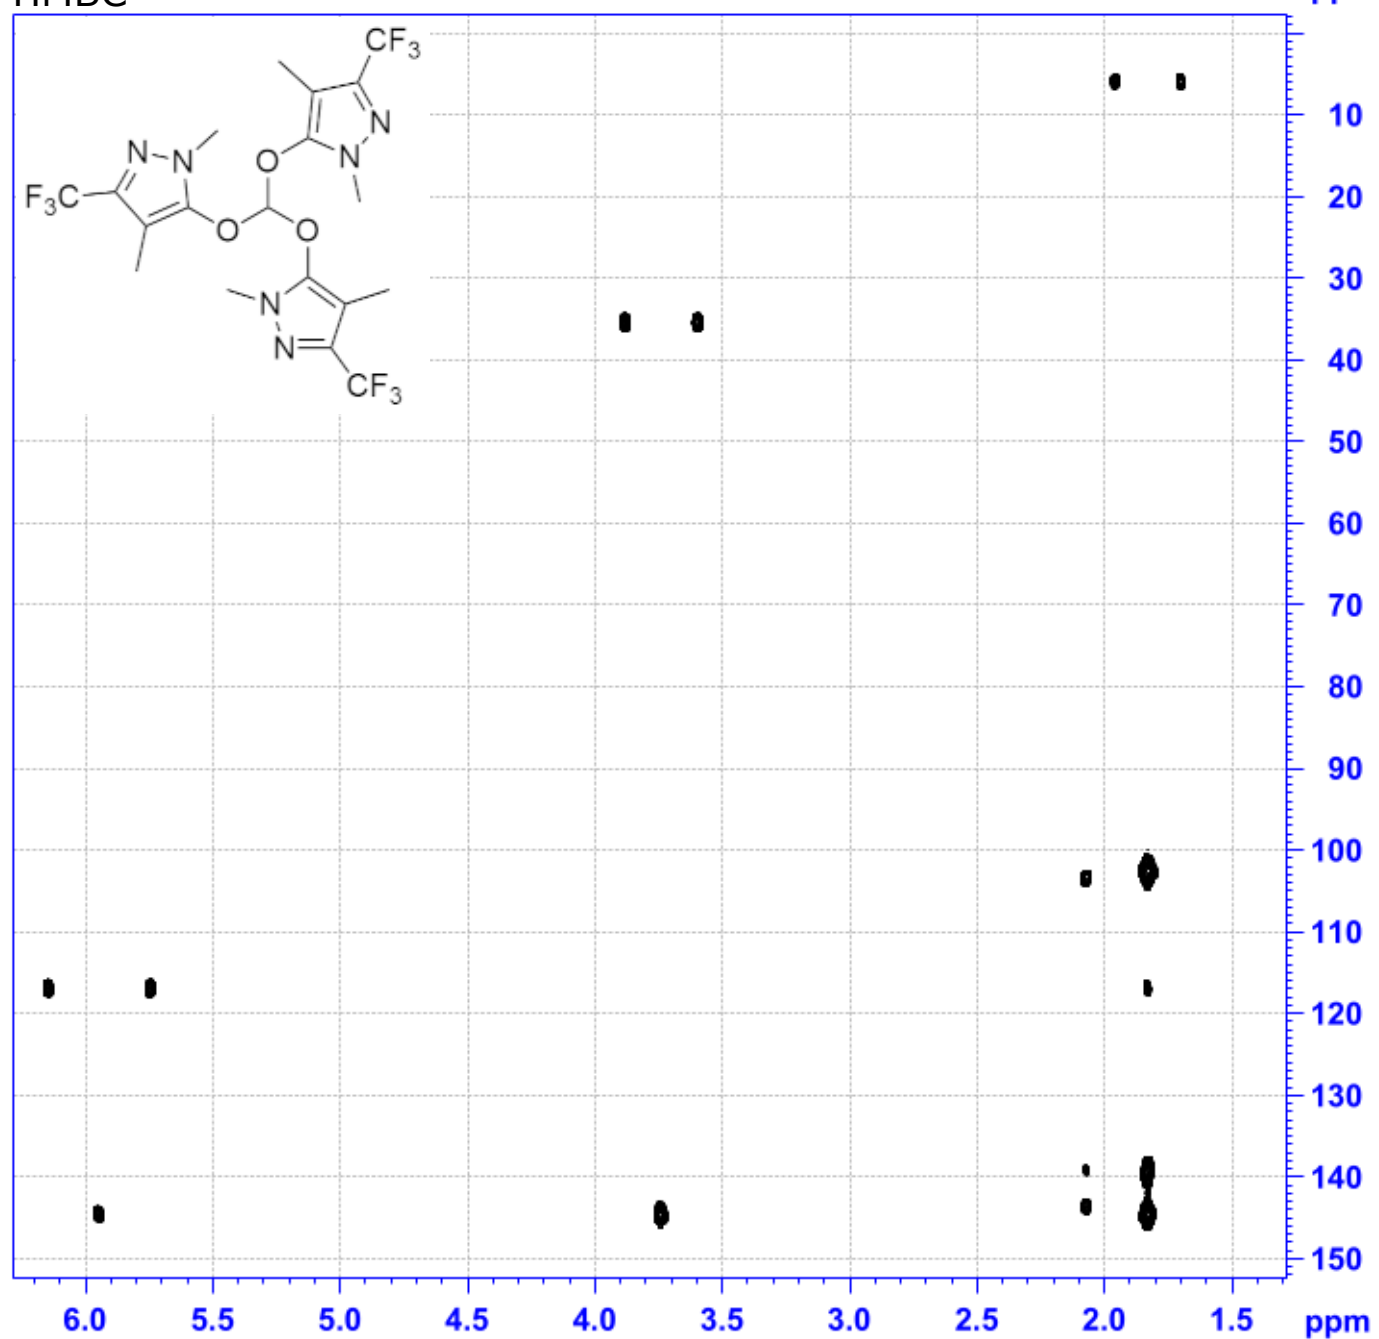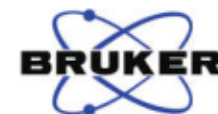

Current Data Parameters  
 NAME P7K1.12.20  
 EXPNO 5  
 PROCNO 1

F2 - Acquisition Parameters  
 Date\_ 20201201  
 Time 11.21 h  
 INSTRUM spect  
 PROBHD 28420\_0082 (PH  
 PULPROG hmbcggplpndqf  
 TD 1024  
 SOLVENT CDCl3  
 NS 8  
 DS 2  
 SWH 2500.000 Hz  
 FIDRES 4.882813 Hz  
 AQ 0.2048000 sec  
 RG 2050  
 DM 200.000 usec  
 DE 6.50 usec  
 TE 300.0 K  
 CNST2 145.0000000  
 CNST13 8.0000000  
 D0 0.00000300 sec  
 D1 1.00000000 sec  
 D2 0.00344828 sec  
 D6 0.06250000 sec  
 D16 0.00020000 sec  
 IN0 0.00002570 sec  
 TDav 1  
 SFO1 500.0419002 MHz  
 NUC1 1H  
 P1 10.32 usec  
 P2 20.64 usec  
 PLW1 15.00000000 W  
 SFO2 125.7445881 MHz  
 NUC2 13C  
 P3 13.00 usec  
 PLW2 55.00000000 W  
 GPNAM[1] SMSQ10.100  
 GPZ1 50.00 %  
 GPNAM[2] SMSQ10.100  
 GPZ2 30.00 %  
 GPNAM[3] SMSQ10.100  
 GPZ3 40.10 %  
 P16 1000.00 usec

F1 - Acquisition parameters  
 TD 128  
 SFO1 125.7446 MHz  
 FIDRES 303.988312 Hz  
 SW 154.720 ppm  
 FnmODE QF

F2 - Processing parameters  
 SI 1024  
 SF 500.0400090 MHz  
 NDW QSINE  
 SSB 0  
 LB 0 Hz  
 GB 0  
 PC 1.00

F1 - Processing parameters  
 SI 512  
 MC2 QF  
 SF 125.7351530 MHz  
 NDW QSINE  
 SSB 0  
 LB 0 Hz  
 GB 0



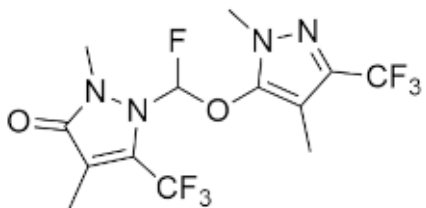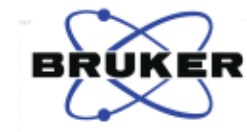

Current Data Parameters  
 NAME P7K10.2.21  
 EXPNO 1  
 PROCNO 1

F2 - Acquisition Parameters  
 Date\_ 20210210  
 Time\_ 14.31 h  
 INSTRUM spect  
 PROBHD Z8420\_0082 (PH  
 PULPROG zg30  
 TD 65536  
 SOLVENT CDCl3  
 NS 24  
 DS 0  
 SWH 7002.801 Hz  
 FIDRES 0.213709 Hz  
 AQ 4.6792703 sec  
 RG 45.2  
 DW 71.400 usec  
 DE 6.50 usec  
 TE 300.0 K  
 D1 0.10000000 sec  
 TD0 1  
 SFO1 500.0430002 MHz  
 NUC1 1H  
 P1 10.32 usec  
 PLW1 15.00000000 W

F2 - Processing parameters  
 SI 65536  
 SF 500.0399851 MHz  
 WDW EM  
 SSB 0  
 LB 0 Hz  
 GB 0  
 PC 1.00

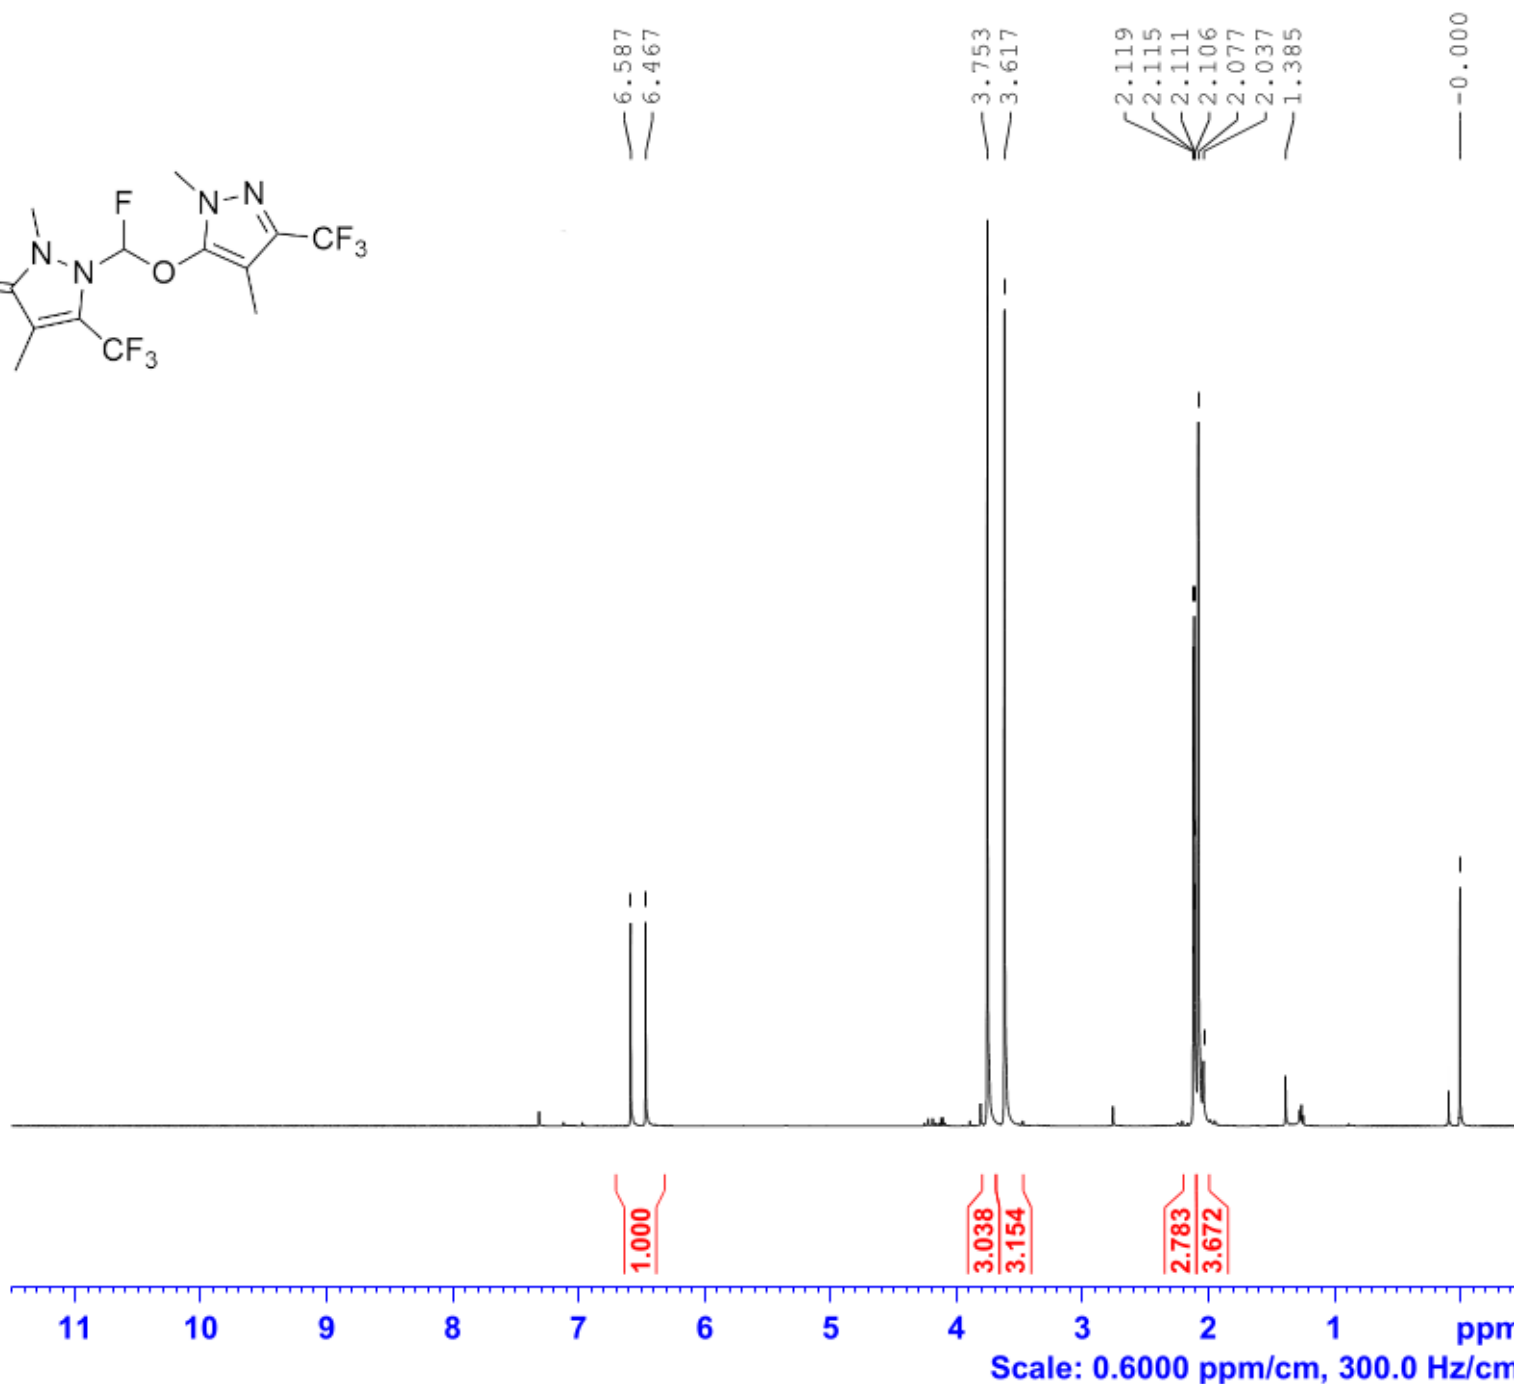

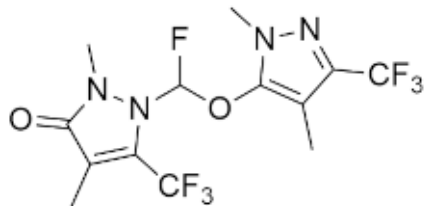

166.089  
 145.768  
 139.544  
 139.250  
 136.581  
 136.265  
 122.387  
 121.807  
 121.009  
 120.246  
 118.845  
 110.209  
 108.233  
 102.892  
 77.457  
 77.202  
 76.948  
 35.486  
 33.923  
 33.913  
 26.815  
 7.843  
 6.291  
 -0.002

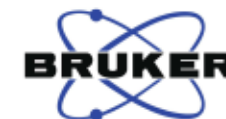

Current Data Parameters  
 NAME P7K10.2.21  
 EXPNO 2  
 PROCNO 1

F2 - Acquisition Parameters  
 Date\_ 20210210  
 Time 15.51 h  
 INSTRUM spect  
 PROBHD z8420\_0082 (PH  
 PULPROG zgdc30  
 TD 65536  
 SOLVENT CDC13  
 NS 900  
 DS 0  
 SWH 29761.904 Hz  
 FIDRES 0.908261 Hz  
 AQ 1.1010048 sec  
 RG 2050  
 DW 16.800 usec  
 DE 6.50 usec  
 TE 300.0 K  
 D1 0.10000000 sec  
 D11 0.03000000 sec  
 TD0 1  
 SFO1 125.7477315 MHz  
 NUC1 13C  
 P1 13.00 usec  
 PLW1 55.00000000 W  
 SFO2 500.0425002 MHz  
 NUC2 1H  
 CPDPRG[2] waltz16  
 PCPD2 80.00 usec  
 PLW2 15.00000000 W  
 PLW12 0.24962001 W

F2 - Processing parameters  
 SI 32768  
 SF 125.7351385 MHz  
 WDW EM  
 SSB 0  
 LB 2.00 Hz  
 GB 0  
 PC 1.00

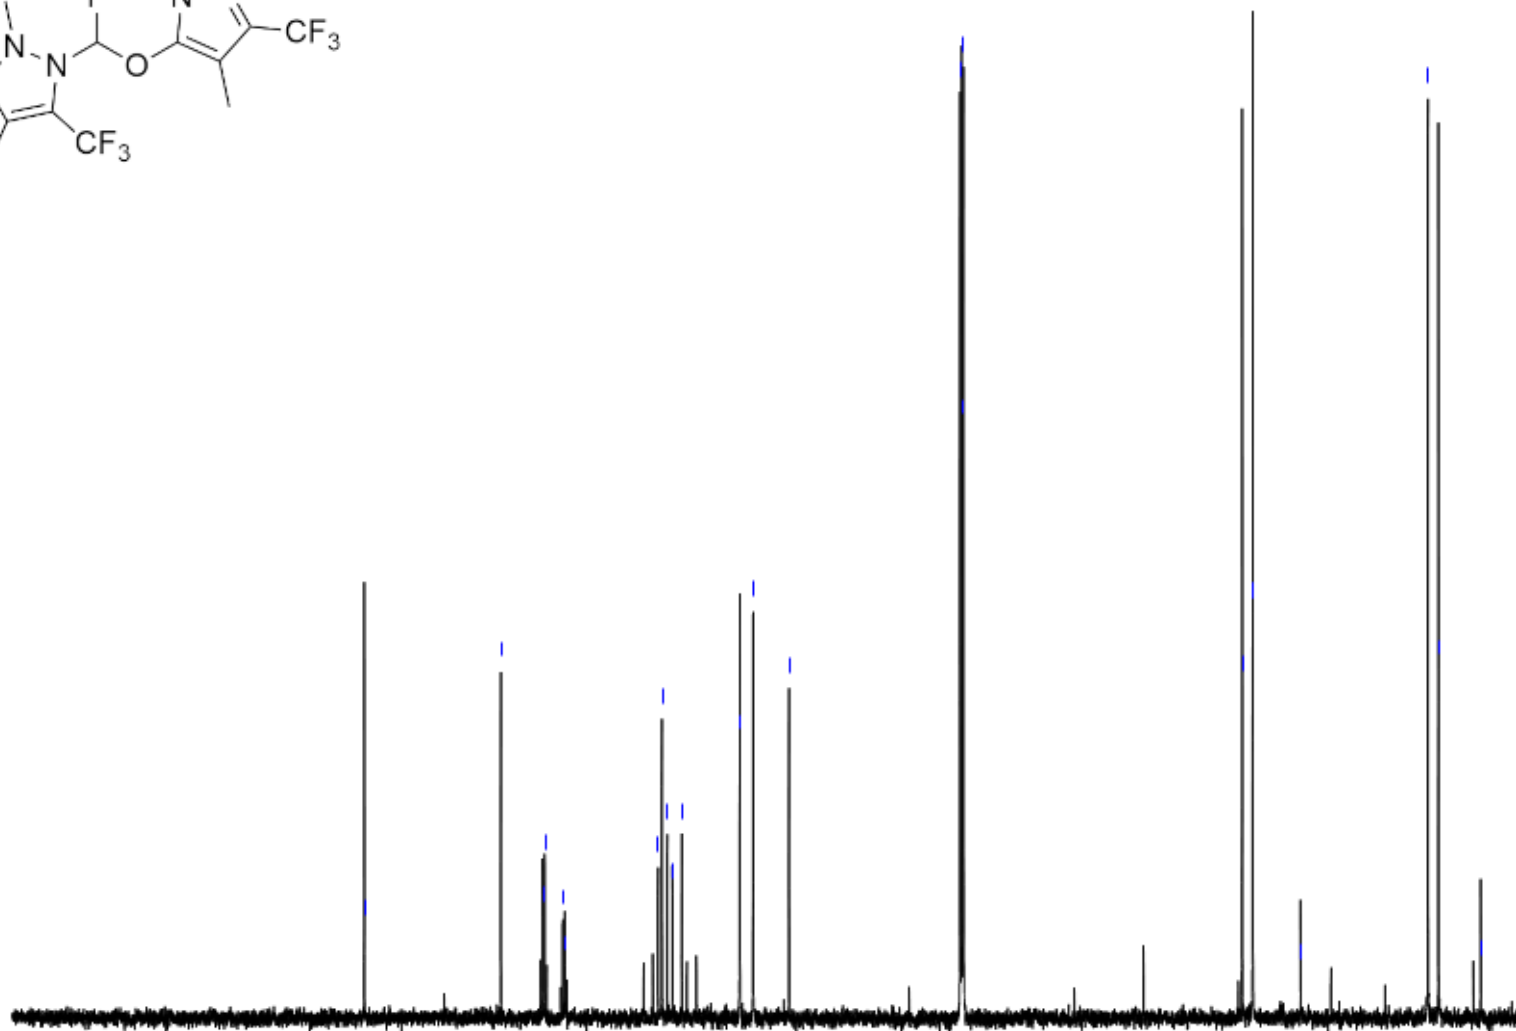

200 180 160 140 120 100 80 60 40 20 ppm  
 Scale: 11.25 ppm/cm, 1415 Hz/cm

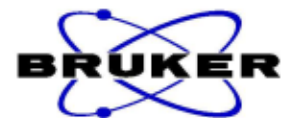

NAME P7K10.2.21  
EXPNO 3  
PROCNO 1  
Date\_ 20210214  
Time 11.24  
INSTRUM spect  
PROBHD 5 mm PABBO BB-  
PULPROG zg30  
TD 32768  
SOLVENT CDCl3  
NS 48  
DS 0  
SWH 22522.523 Hz  
FIDRES 0.687333 Hz  
AQ 0.7274996 se  
RG 1625.5  
DW 22.200 us  
DE 6.32 us  
TE 300.1 K  
D1 0.10000000 se  
TD0 1

===== CHANNEL f1 =====  
NUC1 19F  
P1 7.90 us  
PL1 0.00 dB  
SFO1 376.4400194 MHz  
SI 32768  
SF 376.4703301 MHz  
WDW EM  
SSB 0  
LB 0.50 Hz  
GB 0  
PC 1.00

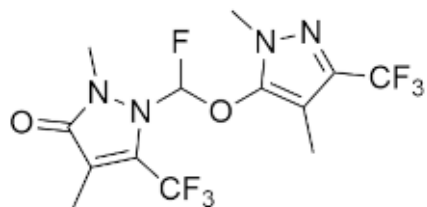

---59.921  
---63.271

<---102.61  
<---102.81

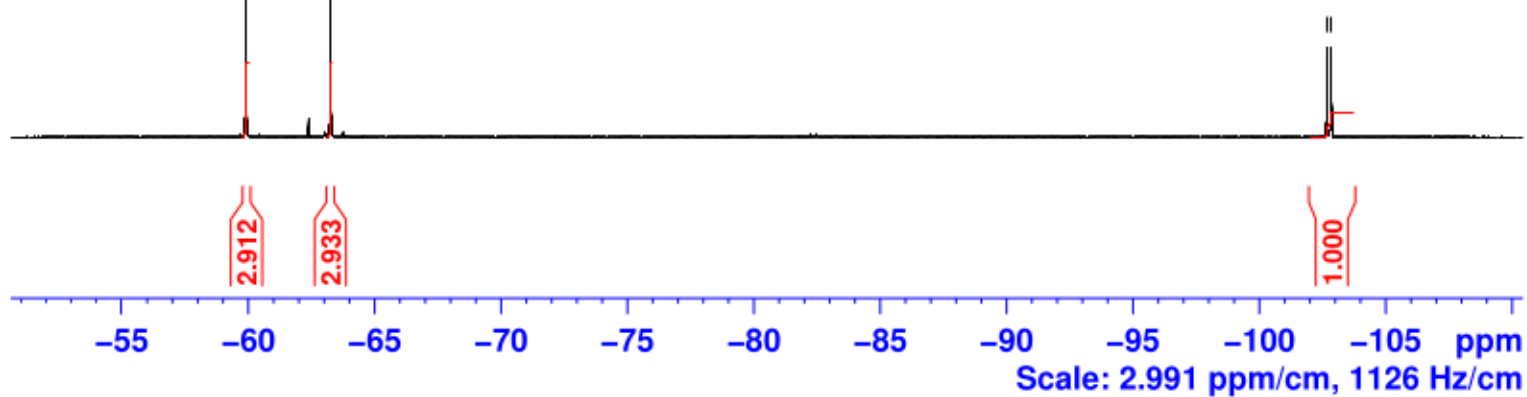



# HMQC

ppm

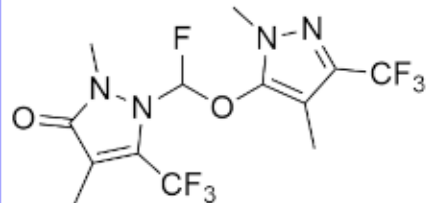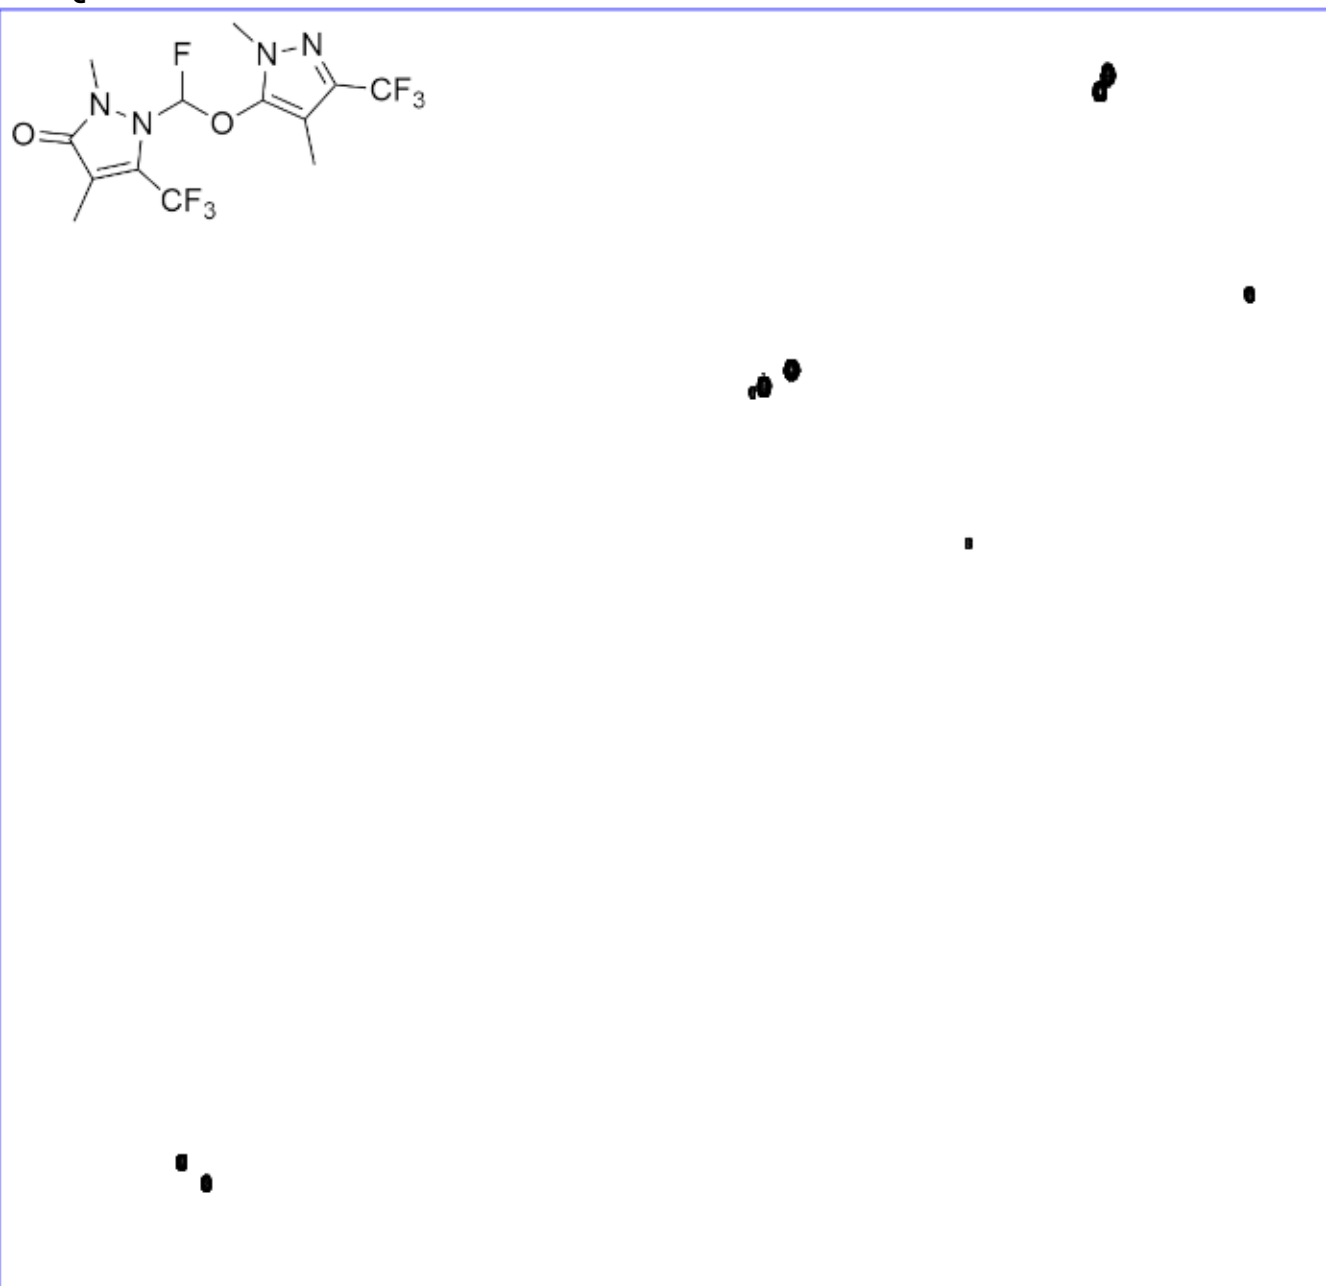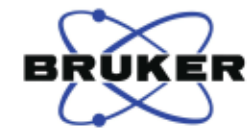

Current Data Parameters  
 NAME P7K10.2.21  
 EXPNO 5  
 PROCNO 1

F2 - Acquisition Parameters  
 Date\_ 20210210  
 Time 15.15 h  
 INSTRUM spect  
 PROBHD z8420\_0082 (PH  
 PULPROG hmqcpgpgf  
 TD 1024  
 SOLVENT CDCl3  
 NS 4  
 DS 2  
 SMH 3246.753 Hz  
 FIDRES 6.341315 Hz  
 AQ 0.1576960 sec  
 RG 2050  
 DW 154.000 usec  
 DE 6.50 usec  
 TE 300.1 K  
 CNST2 145.0000000  
 DO 0.00000300 sec  
 D1 1.00000000 sec  
 D2 0.00344828 sec  
 D12 0.00002000 sec  
 D13 0.00000400 sec  
 D16 0.00020000 sec  
 INO 0.00003310 sec  
 TDev 1  
 SFO1 500.0421002 MHz  
 NUC1 1H  
 P1 10.32 usec  
 P2 20.64 usec  
 PLM1 15.00000000 W  
 SFO2 125.7427021 MHz  
 NUC2 13C  
 CPDPRG2 garp  
 P3 13.00 usec  
 PCPD2 55.00 usec  
 PLM2 55.00000000 W  
 PLM12 2.88000011 W  
 GPNAM[1] SMSQ10.100  
 GPZ1 50.00 %  
 GPNAM[2] SMSQ10.100  
 GPZ2 30.00 %  
 GPNAM[3] SMSQ10.100  
 GPZ3 40.10 %  
 P16 1000.00 usec

F1 - Acquisition parameters  
 TD 128  
 SFO1 125.7427 MHz  
 FIDRES 236.027191 Hz  
 SW 120.132 ppm  
 FhMODE QF

F2 - Processing parameters  
 SI 1024  
 SF 500.0399851 MHz  
 WDM QSINR  
 SSB 0  
 LB 0 Hz  
 GB 0  
 PC 1.00

F1 - Processing parameters  
 SI 512  
 MC2 QF  
 SF 125.7351385 MHz  
 WDM QSINR  
 SSB 0  
 LB 0 Hz  
 GB 0

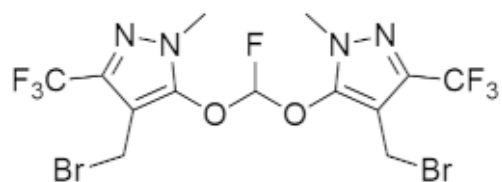

7.274  
7.015  
6.832

4.456  
4.411  
4.245  
3.889  
3.867  
3.821  
3.788  
3.782

2.165  
2.100  
1.466  
1.415  
1.283  
1.261

0.077  
0.001



```

NAME          P7K4.5.20
EXPNO         1
PROCNO        1
Date_         20200504
Time          11.18
INSTRUM       spect
PROBHD        5 mm PABBO BB-
PULPROG       zg30
TD            65536
SOLVENT       CDCl3
NS            24
DS            0
SWH           7183.908 Hz
FIDRES        0.109618 Hz
AQ            4.5613556 sec
RG            128
DW            69.600 usec
DE            6.50 usec
TE            301.0 K
D1            0.10000000 sec
TD0           1
  
```

```

===== CHANNEL f1 =====
NUC1          1H
P1            10.10 usec
PL1           0.00 dB
SFO1          400.1032008 MHz
SI            32768
SF            400.1000046 MHz
WDW           EM
SSB           0
LB            0.00 Hz
GB            0
PC            1.00
  
```

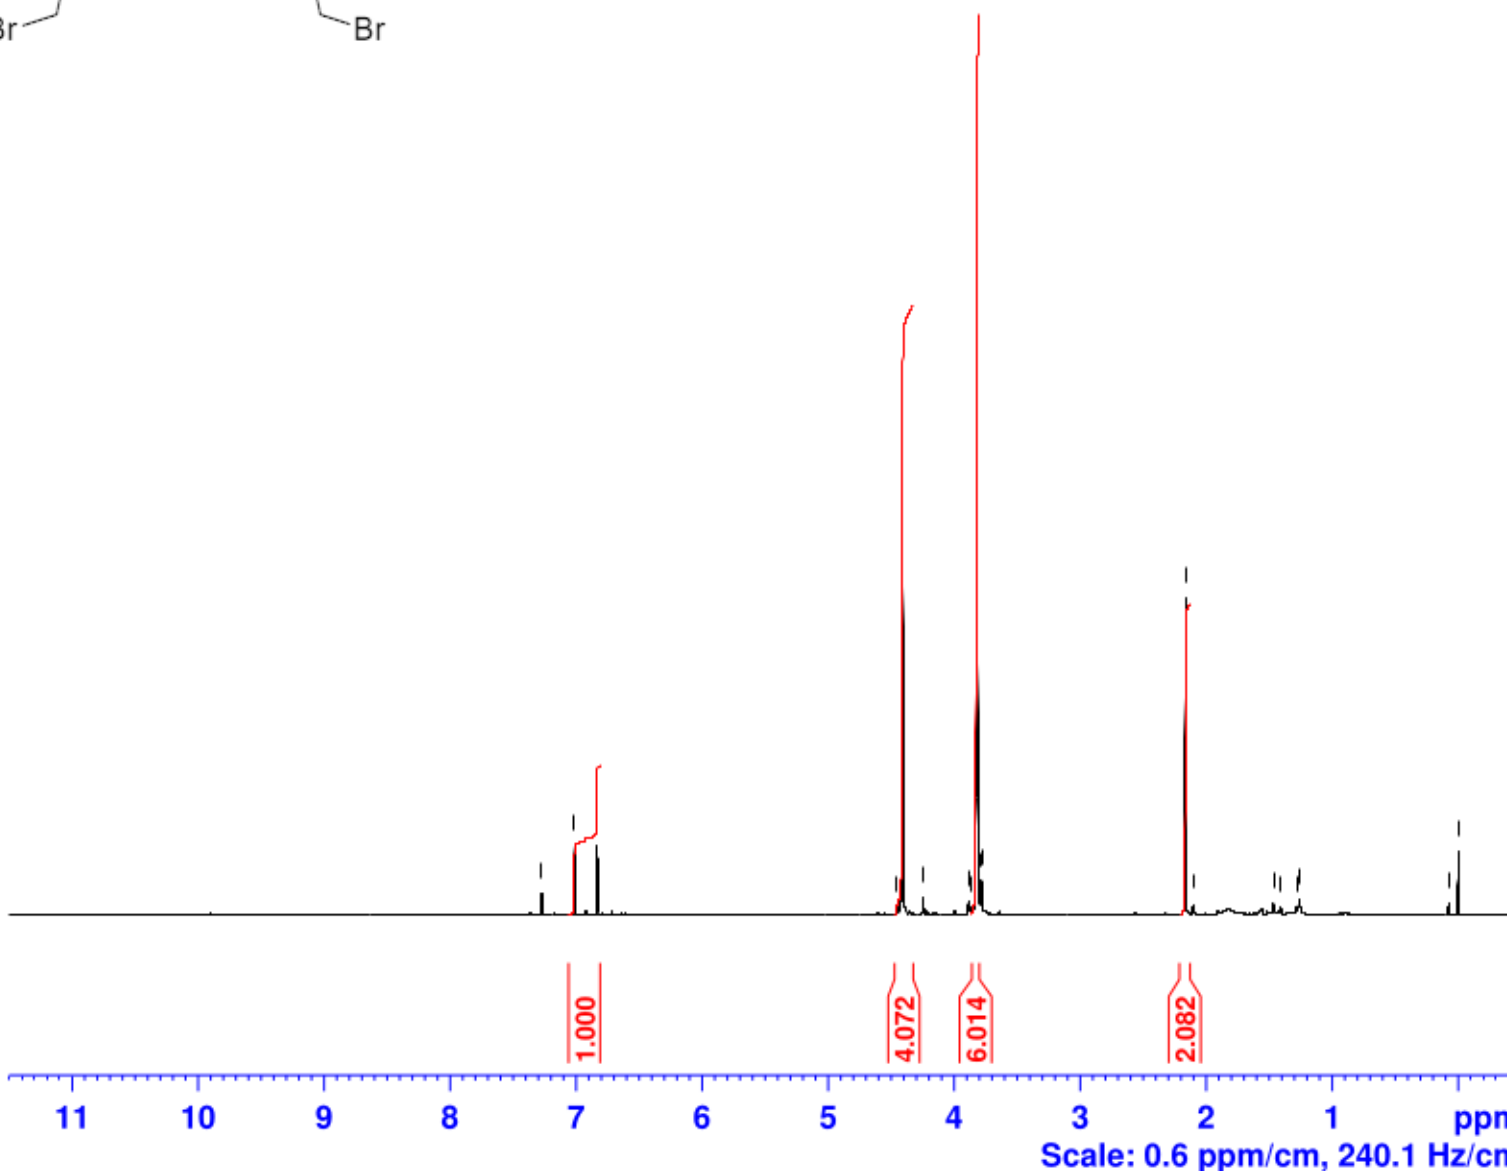

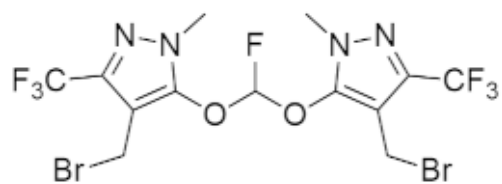

144.134  
 139.124  
 138.744  
 138.364  
 122.034  
 119.354  
 115.404  
 112.764  
 105.944  
 102.544  
 98.562  
 77.399  
 77.081  
 76.763  
 36.032  
 30.901  
 17.759  
 -0.001

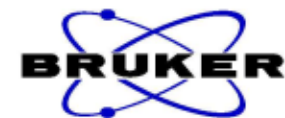

```

NAME          P7K4.5.20
EXPNO         3
PROCNO        1
Date_         20200504
Time          11.27
INSTRUM       spect
PROBHD        5 mm PABBO BB-
PULPROG       zgdc30
TD            32768
SOLVENT       CDC13
NS            2375
DS            0
SWH           24154.590 Hz
FIDRES        0.737140 Hz
AQ            0.6783476 se
RG            71.8
DW            20.700 us
DE            29.57 us
TE            302.3 K
D1            0.10000000 se
D11           0.03000000 se
TD0           1
  
```

```

===== CHANNEL f1 =====
NUC1           13C
P1             9.20 us
PL1            3.00 dB
SFO1          100.6152865 MHz
  
```

```

===== CHANNEL f2 =====
CPDPRG2       waltz16
NUC2           1H
PCPD2         80.00 us
PL2            0.00 dB
PL12          18.00 dB
SFO2          400.1009202 MHz
SI            32768
SF            100.6052190 MHz
WDW            EM
SSB            0
LB             2.00 Hz
GB             0
PC             1.00
  
```

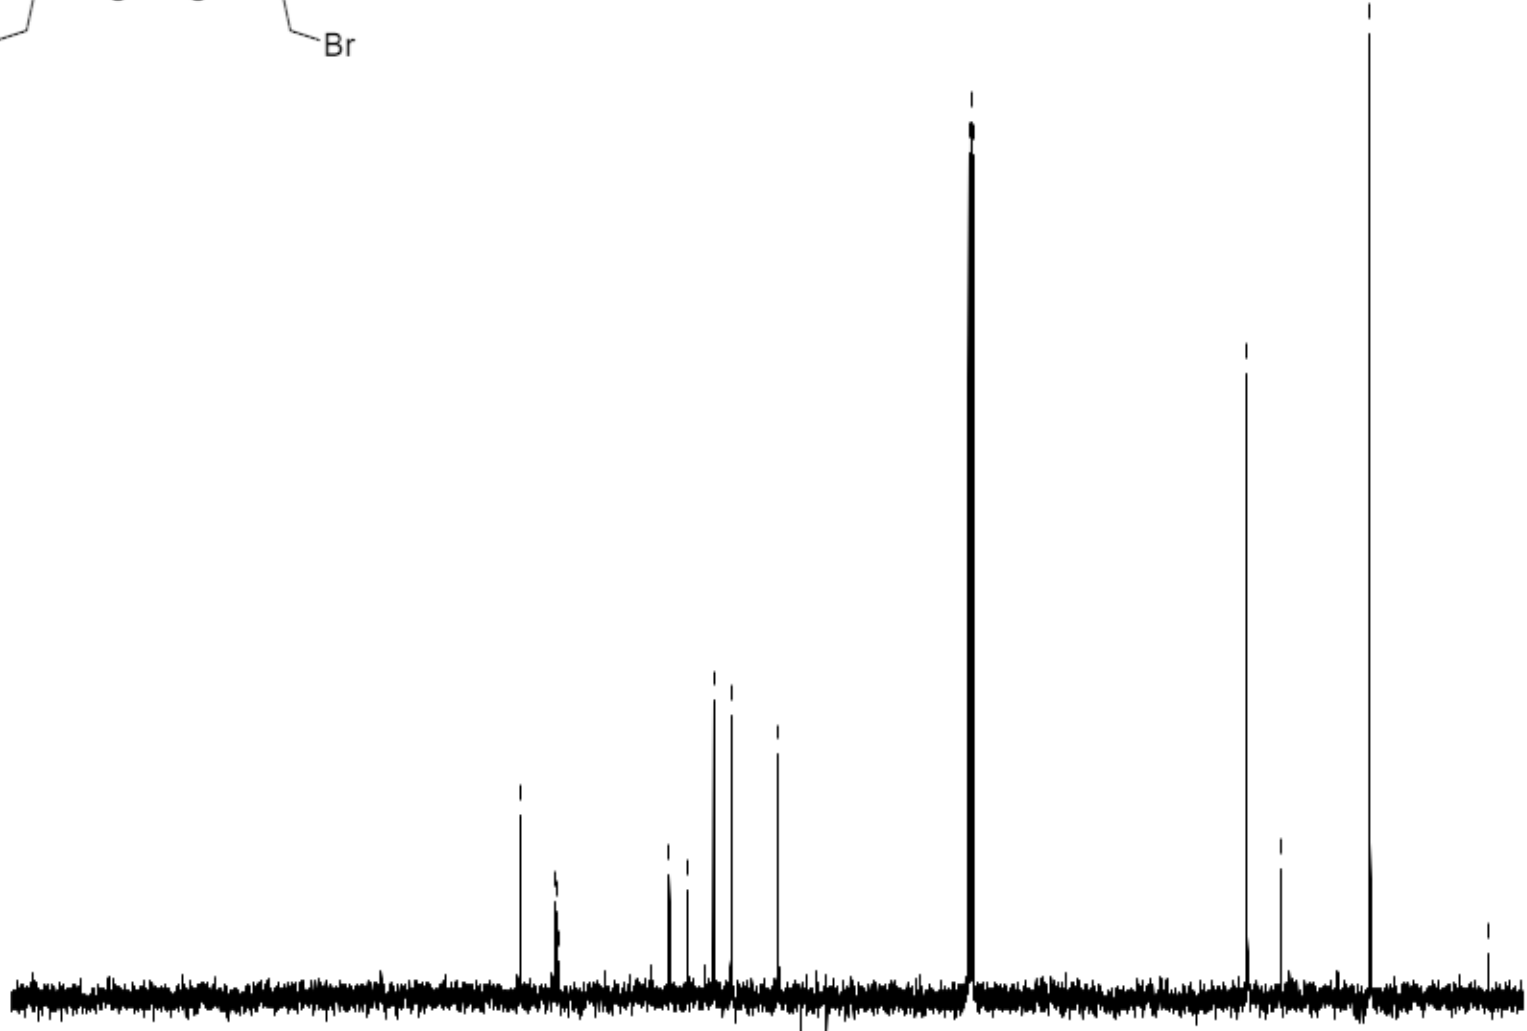

200 180 160 140 120 100 80 60 40 20 ppm  
 Scale: 11.25 ppm/cm, 1132 Hz/cm



NAME P7K4.5.20  
EXPNO 2  
PROCNO 1  
Date\_ 20200504  
Time 11.19  
INSTRUM spect  
PROBHD 5 mm PABBO BB-  
PULPROG zg30  
TD 32768  
SOLVENT CDCl3  
NS 24  
DS 0  
SWH 15060.241 Hz  
FIDRES 0.459602 Hz  
AQ 1.0879476 se  
RG 71.8  
DW 33.200 us  
DE 6.32 us  
TE 301.0 K  
D1 0.10000000 se  
TD0 1

===== CHANNEL f1 =====  
NUC1 19F  
P1 7.90 us  
PL1 0.00 dB  
SFO1 376.4419017 MHz  
SI 32768  
SF 376.4703092 MHz  
WDW EM  
SSB 0  
LB 0.50 Hz  
GB 0  
PC 1.00

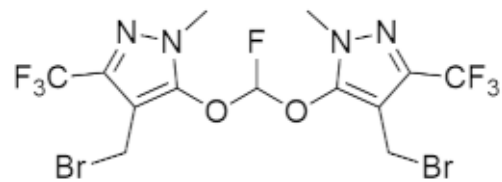

--62.75'

--81.62'  
--81.82'

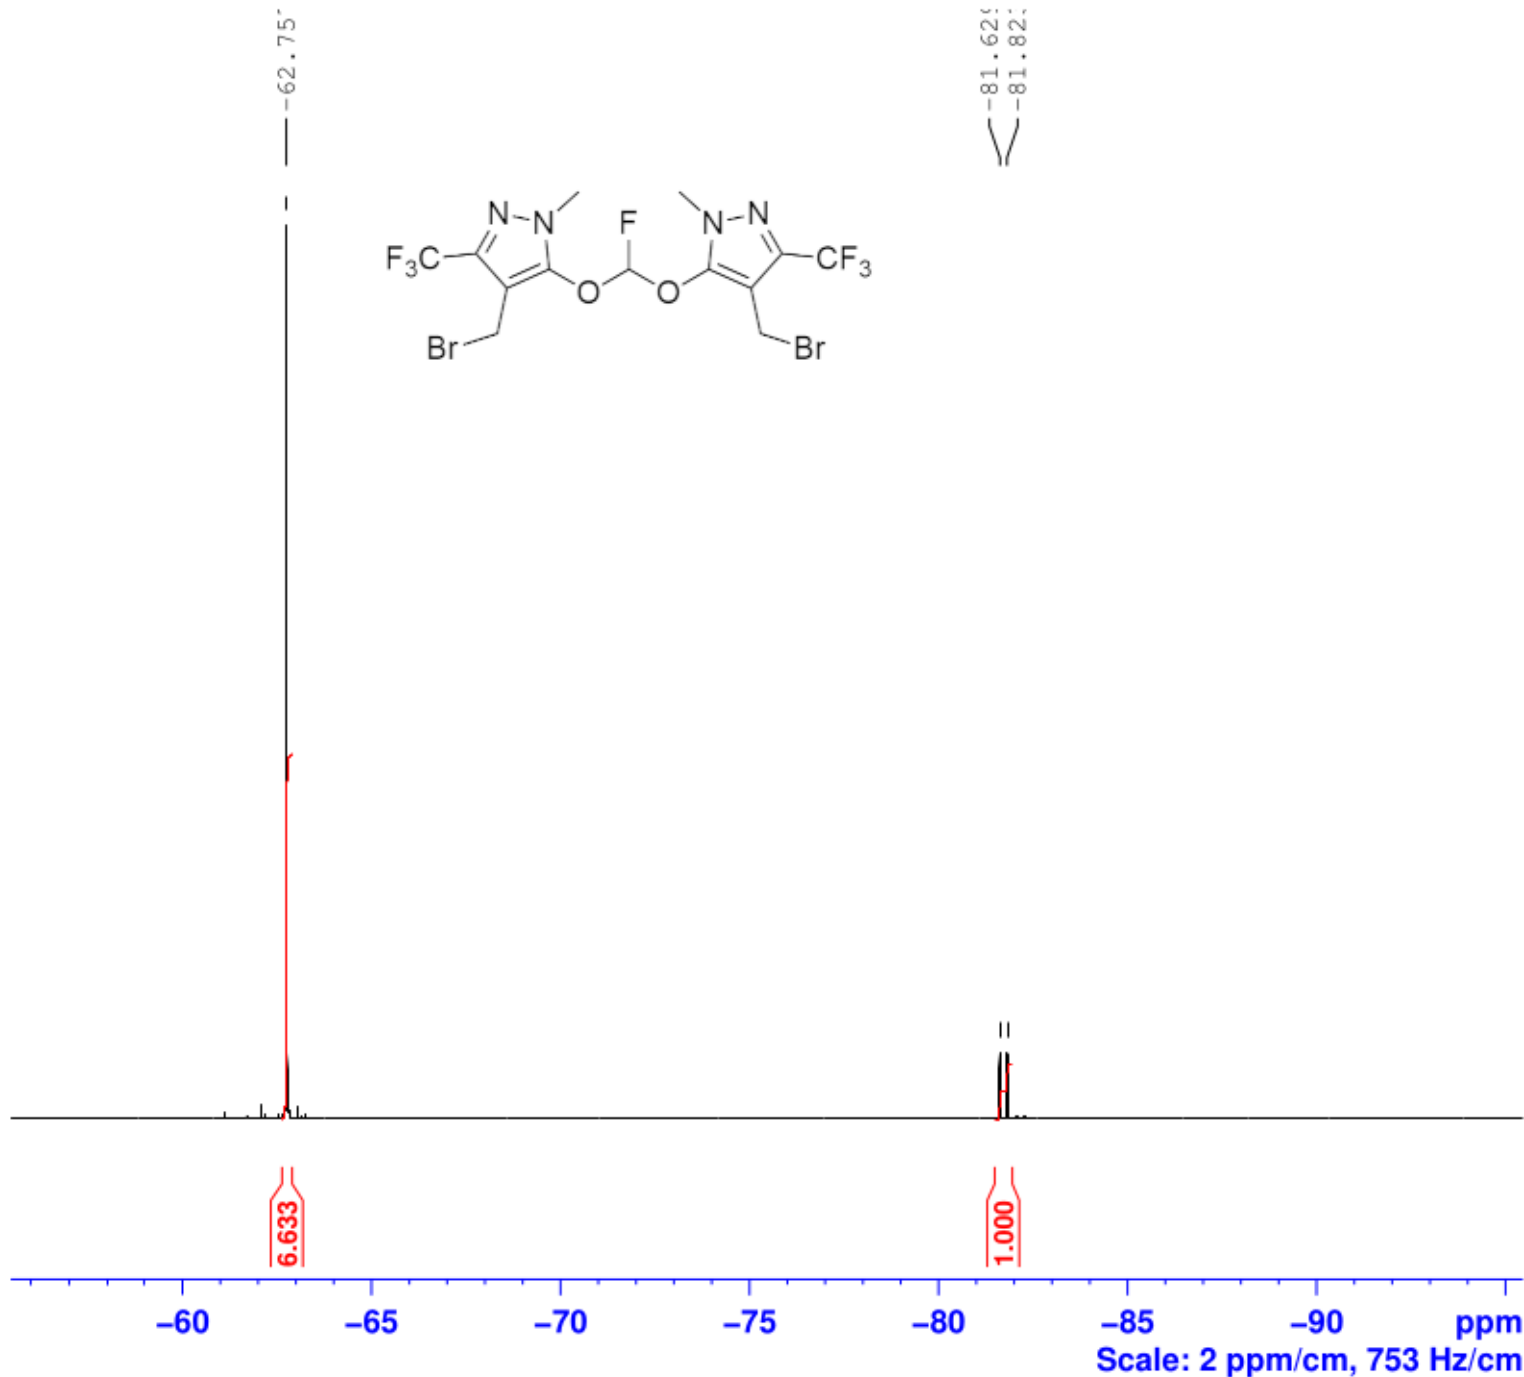



# HMBC

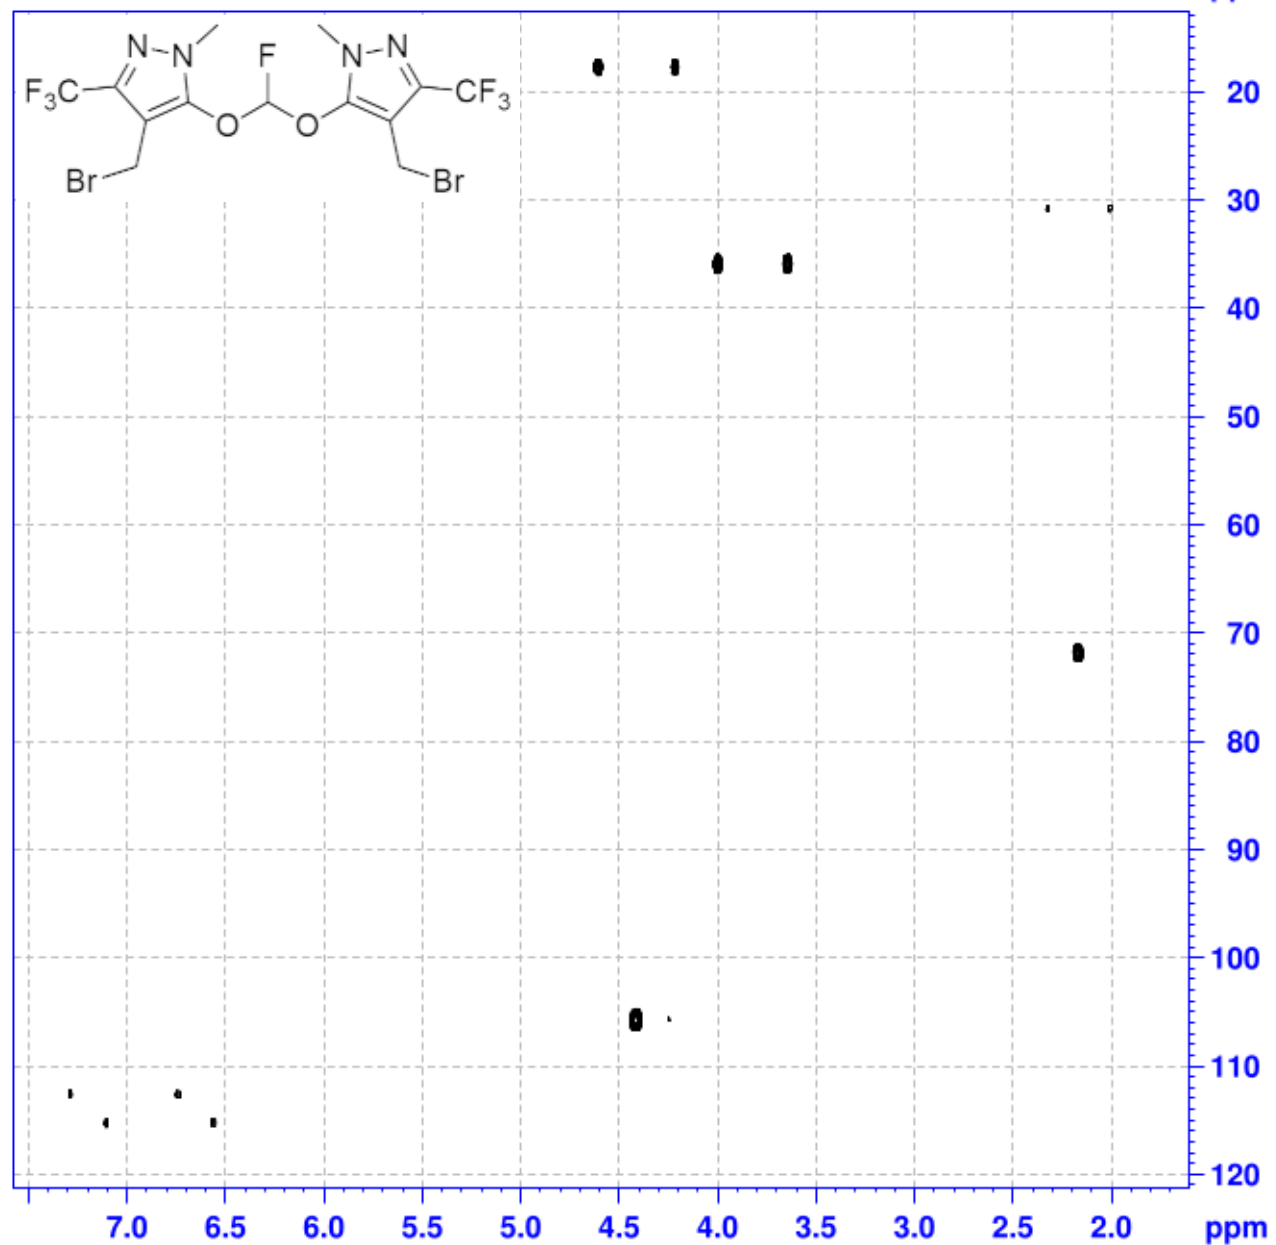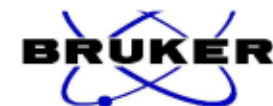

```

NAME          P7K4.5.20
EXPNO         6
PROCNO       1
Date_        20200504
Time         12.26
INSTRUM      spect
PROBHD       5 mm PABBO BB-
PULPROG     hmbcgp1pndqf
TD           1024
SOLVENT      CDC13
NS           10
DS           2
SWH          2394.636 Hz
FIDRES       2.338512 Hz
AQ           0.2138612 sec
RG           46341
DW           208.800 usec
DE           241.25 usec
TE           302.2 K
CNST2        145.0000000
CNST13        8.0000000
D0           0.00000300 sec
D1           1.00000000 sec
D2           0.00344828 sec
D6           0.06250000 sec
D16          0.00020000 sec
IN0          0.00003680 sec
    
```

```

===== CHANNEL f1 =====
NUC1         1H
P1           10.10 usec
P2           20.20 usec
PL1          0.00 dB
SFO1         400.1018405 MHz
    
```

```

===== CHANNEL f2 =====
NUC2         13C
P3           9.20 usec
PL2          0.00 dB
SFO2         100.6132744 MHz
    
```

```

===== GRADIENT CHANNEL =====
GPNAM1      sine.100
GPNAM2      sine.100
GPNAM3      sine.100
GPZ1        50.00 %
GPZ2        30.00 %
GPZ3        40.10 %
P16         1000.00 usec
ND0         2
TD          128
SFO1        100.6133 MHz
FIDRES      106.115562 Hz
SW          135.000 ppm
FnMODE      QF
SI          1024
SF          400.1000046 MHz
WDW         QSINE
SSB         0
LB          0.00 Hz
GB          0
PC          1.00
SI          512
MC2         QF
SF          100.6052190 MHz
WDW         QSINE
SSB         0
LB          0.00 Hz
GB          0
    
```

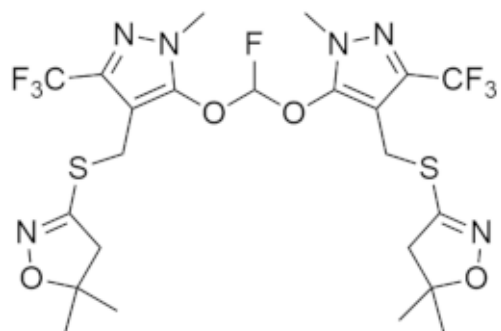

7.099  
6.950

4.244  
4.216  
4.178  
4.150  
3.797

2.748

1.381

0.000

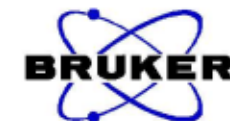

Current Data Parameters  
 NAME P7K4.3.21  
 EXPNO 1  
 PROCNO 1

F2 - Acquisition Parameters  
 Date\_ 20210304  
 Time 11.00 h  
 INSTRUM spect  
 PROBHD 28420\_0082 (PH  
 PULPROG zg30  
 TD 65536  
 SOLVENT CDC13  
 NS 24  
 DS 0  
 SWH 7002.801 Hz  
 FIDRES 0.213709 Hz  
 AQ 4.6792703 sec  
 RG 128  
 DW 71.400 usec  
 DE 6.50 usec  
 TE 300.0 K  
 D1 0.10000000 sec  
 TD0 1  
 SFO1 500.0430002 MHz  
 NUC1 1H  
 P1 10.32 usec  
 PLW1 15.00000000 W

F2 - Processing parameters  
 SI 65536  
 SF 500.0399969 MHz  
 WDW EM  
 SSB 0  
 LB 0 Hz  
 GB 0  
 PC 1.00

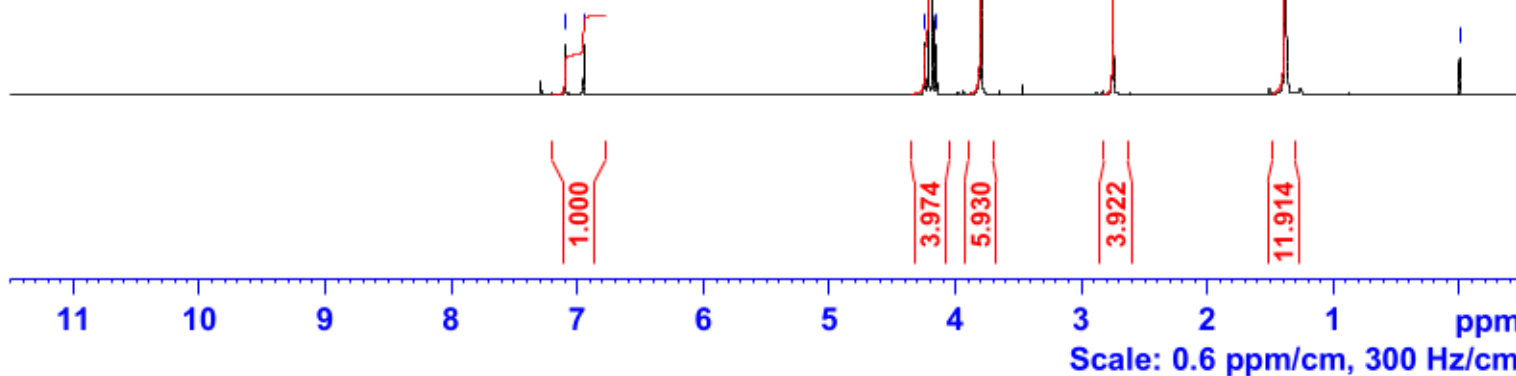

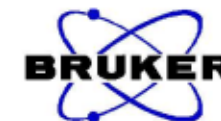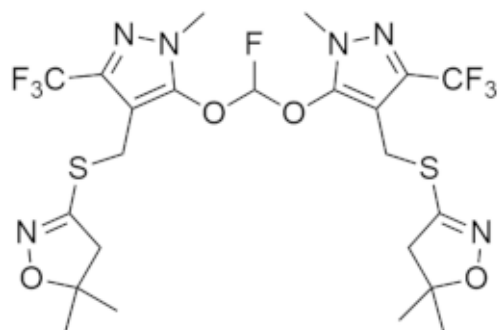

154.107  
144.358  
139.493  
139.195  
138.894  
138.595  
124.155  
122.009  
119.864  
117.719  
116.555  
114.449  
103.603  
84.947  
77.362  
77.108  
76.854  
50.076  
35.989  
26.773  
22.198

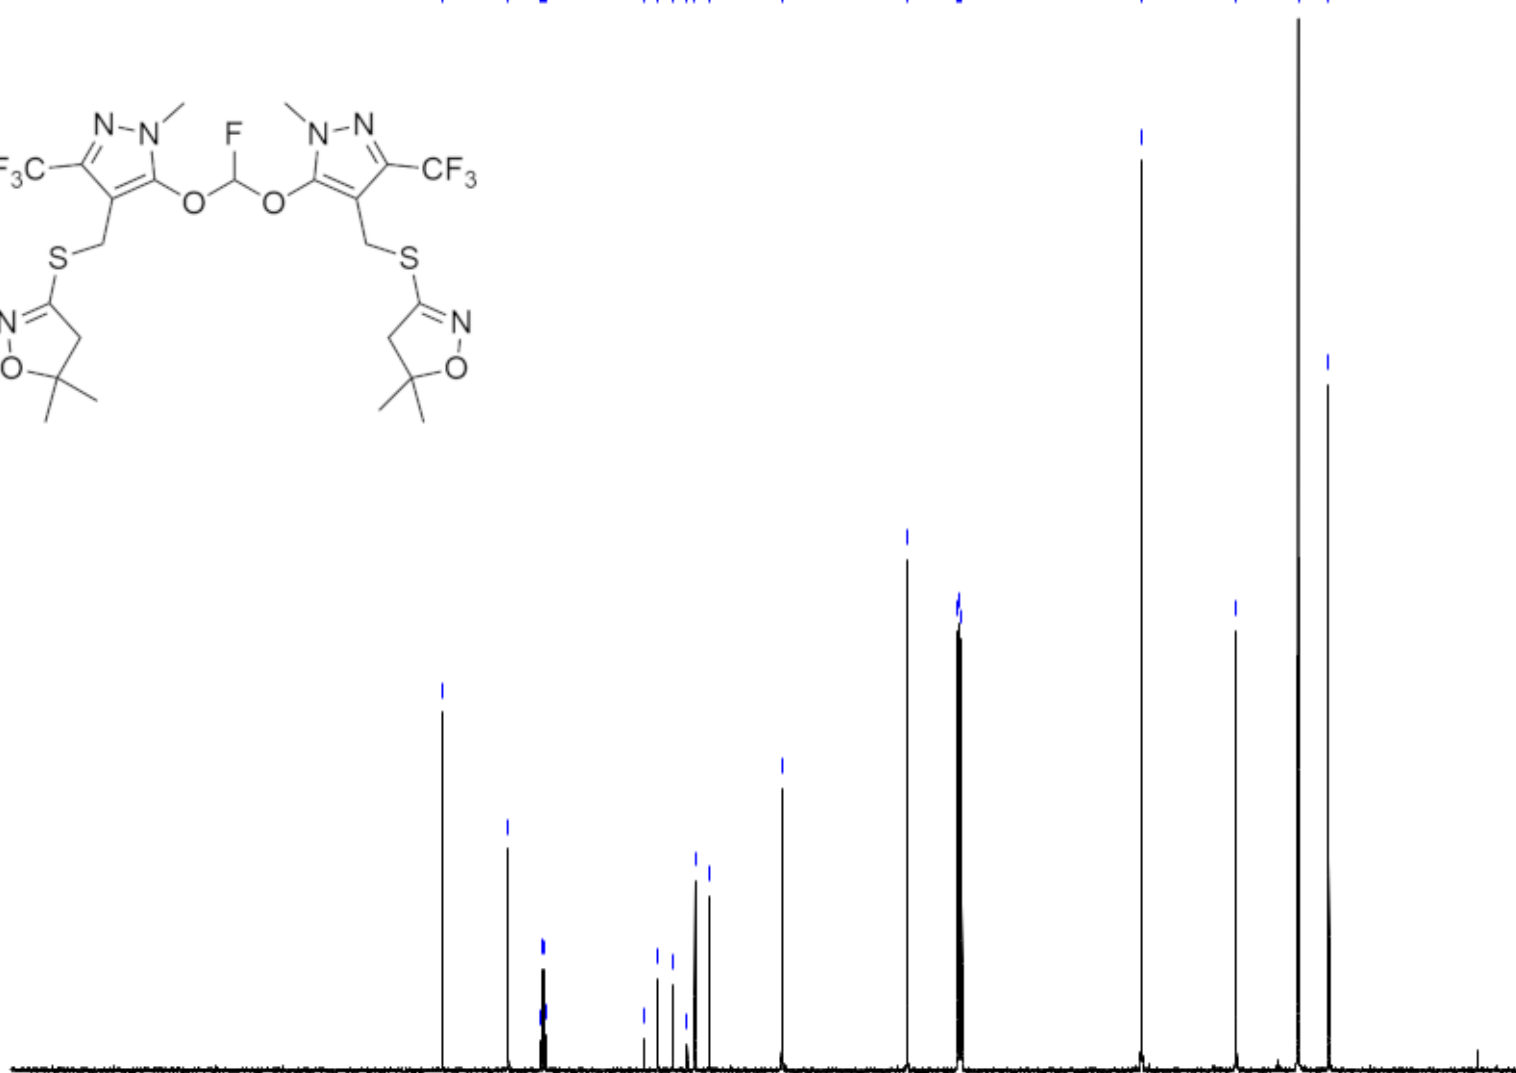

Current Data Parameters  
NAME P7K4.3.21  
EXPNO 2  
PROCNO 1

F2 - Acquisition Parameters  
Date\_ 20210304  
Time 11.31 h  
INSTRUM spect  
PROBHD 28420\_0082 (PH  
PULPROG zgdc30  
TD 65536  
SOLVENT CDC13  
NS 1500  
DS 0  
SWH 29761.904 Hz  
FIDRES 0.908261 Hz  
AQ 1.1010048 sec  
RG 2050  
DW 16.800 usec  
DE 6.50 usec  
TE 300.0 K  
D1 0.10000000 sec  
D11 0.03000000 sec  
TD0 1  
SFO1 125.7477315 MHz  
NUC1 13C  
P1 13.00 usec  
PLW1 55.00000000 W  
SFO2 500.0425002 MHz  
NUC2 1H  
CPDPRG[2] waltz16  
PCPD2 80.00 usec  
PLW2 15.00000000 W  
PLW12 0.24962001 W

F2 - Processing parameters  
SI 32768  
SF 125.7351521 MHz  
WDW EM  
SSB 0  
LB 2.00 Hz  
GB 0  
PC 1.00

200 180 160 140 120 100 80 60 40 20 ppm  
Scale: 11.25 ppm/cm, 1415 Hz/cm



NAME P7K4.3.21  
EXPNO 5  
PROCNO 1  
Date\_ 20210304  
Time 12.11  
INSTRUM spect  
PROBHD 5 mm PABBO BB-  
PULPROG zg30  
TD 32768  
SOLVENT CDCl3  
NS 24  
DS 0  
SWH 15060.241 Hz  
FIDRES 0.459602 Hz  
AQ 1.0879476 se  
RG 1625.5  
DW 33.200 us  
DE 6.32 us  
TE 299.9 K  
D1 0.10000000 se  
TD0 1

===== CHANNEL f1 =====  
NUC1 19F  
P1 7.90 us  
PL1 0.00 dB  
SFO1 376.4437841 MHz  
SI 32768  
SF 376.4703301 MHz  
WDW EM  
SSB 0  
LB 0.50 Hz  
GB 0  
PC 1.00

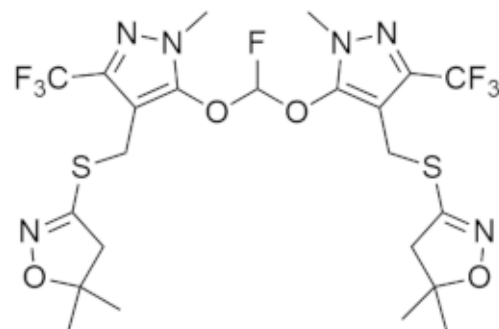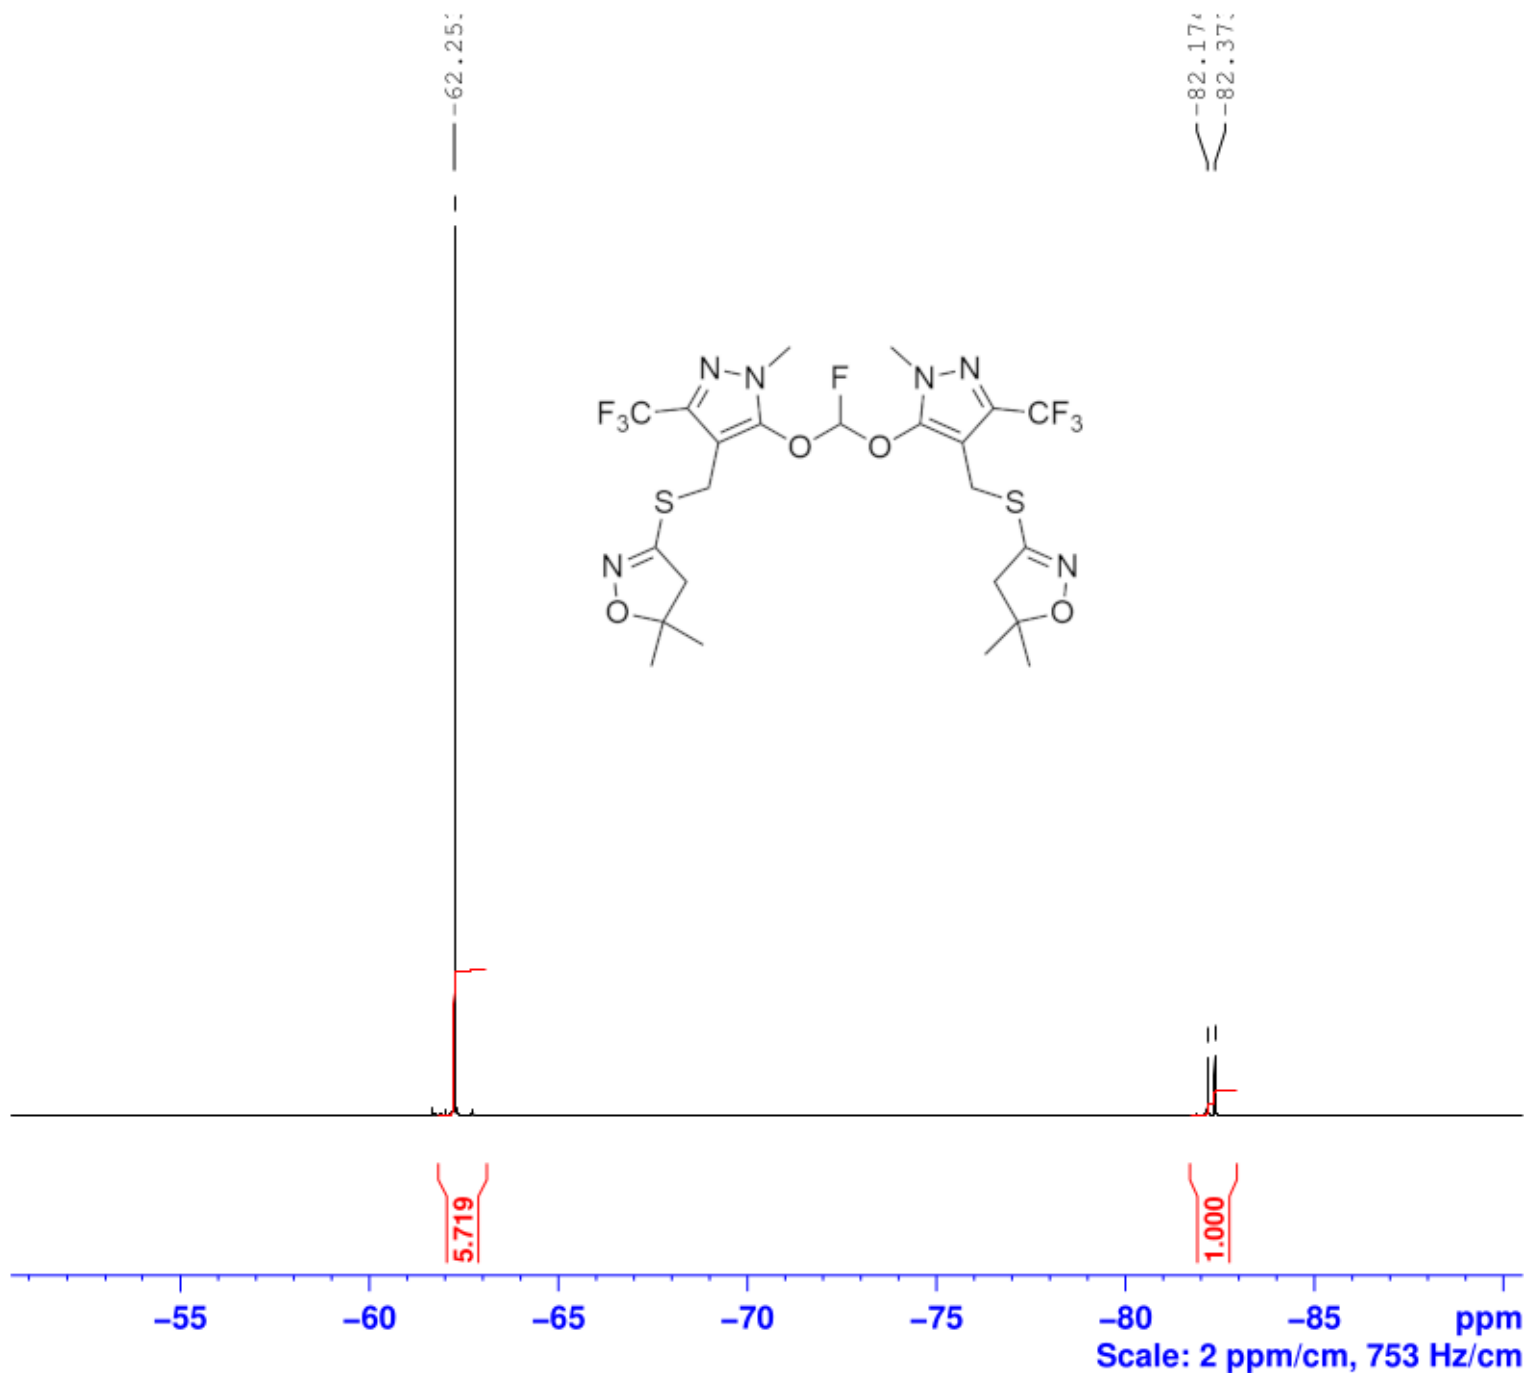

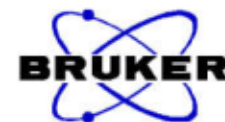

Current Data Parameters  
NAME P7K3.11.20  
EXPNO 1  
PROCNO 1

F2 - Acquisition Parameters  
Date\_ 20201103  
Time\_ 16.47 h  
INSTRUM spect  
PROBHD Z8420\_0082 (PH  
PULPROG zg30  
TD 65536  
SOLVENT CDCl3  
NS 48  
DS 0  
SWH 7002.801 Hz  
FIDRES 0.213709 Hz  
AQ 4.6792703 sec  
RG 181  
DW 71.400 usec  
DE 6.50 usec  
TE 300.0 K  
D1 0.10000000 sec  
TD0 1  
SFO1 500.0430002 MHz  
NUC1 1H  
P1 10.32 usec  
PLW1 15.00000000 W

F2 - Processing parameters  
SI 65536  
SF 500.0400437 MHz  
WDW EM  
SSB 0  
LB 0 Hz  
GB 0  
PC 1.00

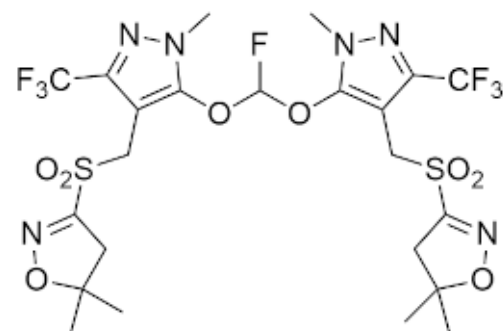

7.196  
7.116  
6.965

4.565  
4.558

3.807

3.045  
3.010  
2.998  
2.963

1.967

1.430  
1.421

-0.000

1.000

4.060

6.258

4.108

12.754

11 10 9 8 7 6 5 4 3 2 1 ppm

Scale: 0.6 ppm/cm, 300 Hz/cm

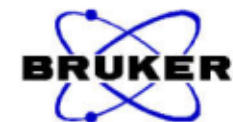

Current Data Parameters  
NAME P7K3.11.20  
EXPNO 3  
PROCNO 1

F2 - Acquisition Parameters  
Date\_ 20201104  
Time\_ 7.59 h  
INSTRUM spect  
PROBHD 28420\_0082 (PH  
PULPROG zgdc30  
TD 65536  
SOLVENT CDCl3  
NS 33323  
DS 0  
SWH 29761.904 Hz  
FIDRES 0.908261 Hz  
AQ 1.1010048 sec  
RG 2050  
DW 16.800 usec  
DE 6.50 usec  
TE 300.0 K  
D1 0.10000000 sec  
D11 0.03000000 sec  
TD0 1  
SFO1 125.7477315 MHz  
NUC1 13C  
P1 13.00 usec  
PLW1 55.00000000 W  
SFO2 500.0425002 MHz  
NUC2 1H  
CPDPRG[2] waltz16  
PCPD2 80.00 usec  
PLW2 15.00000000 W  
PLW12 0.24962001 W

F2 - Processing parameters  
SI 32768  
SF 125.7352853 MHz  
WDW EM  
SSB 0  
LB 2.00 Hz  
GB 0  
PC 1.00

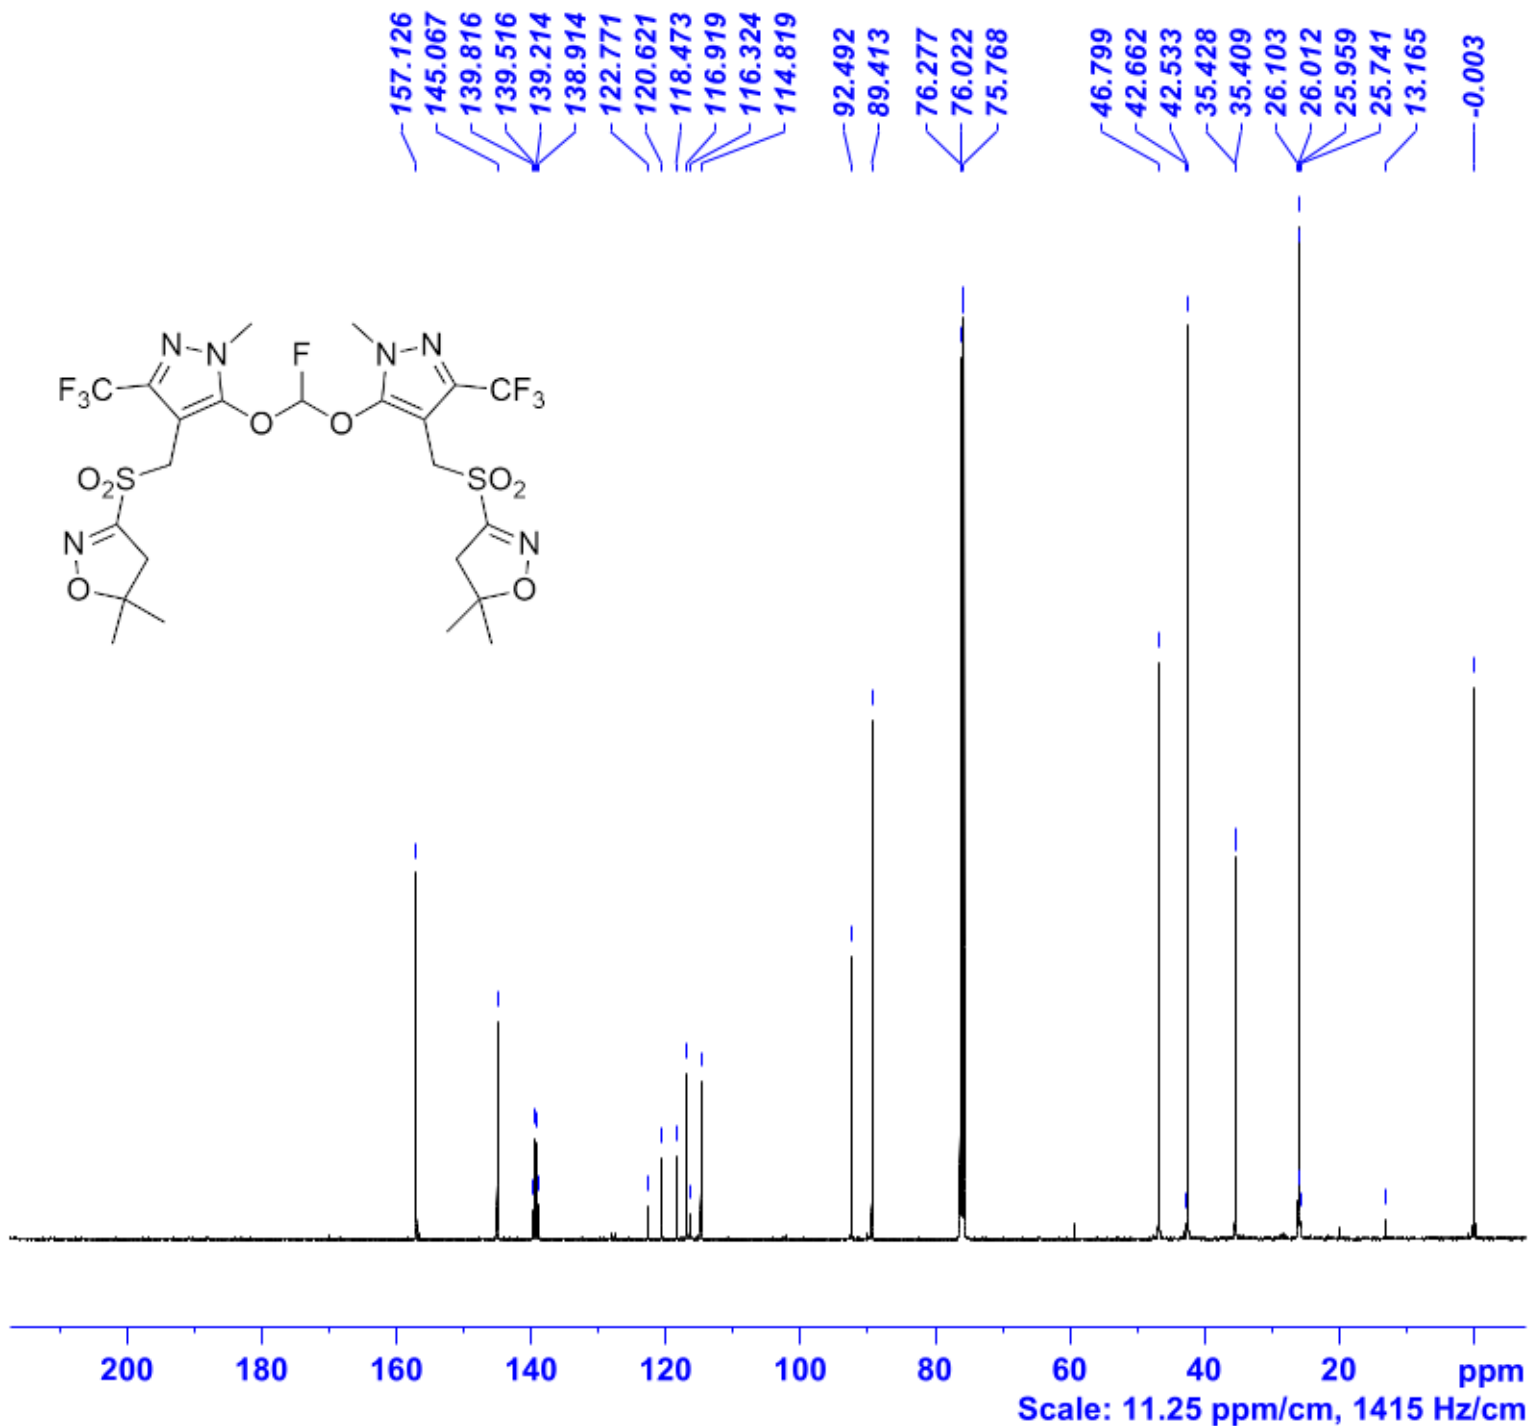

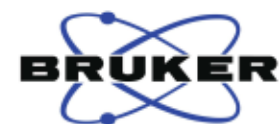

Current Data Parameters  
NAME P7K3.11.20  
EXPNO 5  
PROCNO 1

F2 - Acquisition Parameters  
Date\_ 20201103  
Time\_ 14.34  
INSTRUM spect  
PROBHD 5 mm PABBO BB-  
PULPROG zg30  
TD 32768  
SOLVENT CDC13  
NS 8  
DS 0  
SWH 11261.262 Hz  
FIDRES 0.343666 Hz  
AQ 1.4548992 sec  
RG 3251  
DW 44.400 usec  
DE 6.32 usec  
TE 301.0 K  
D1 0.1000000 sec  
TD0 1

===== CHANNEL f1 =====  
NUC1 19F  
P1 7.90 usec  
PL1 0 dB  
SF01 376.4437841 MHz

F2 - Processing parameters  
SI 32768  
SF 376.4703301 MHz  
WDW EM  
SSB 0  
LB 0.50 Hz  
GB 0  
PC 1.00

-81.995  
-82.196

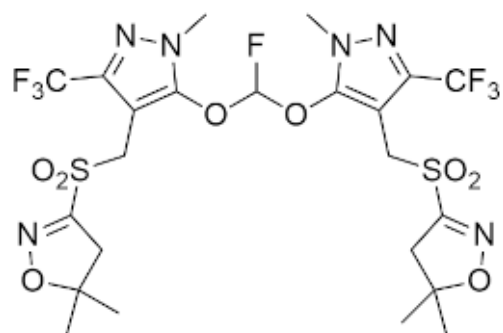

-61.705

5.879

1.000

-58 -60 -62 -64 -66 -68 -70 -72 -74 -76 -78 -80 -82 ppm

Scale: 1.496 ppm/cm, 563.1 Hz/cm

# HMBC

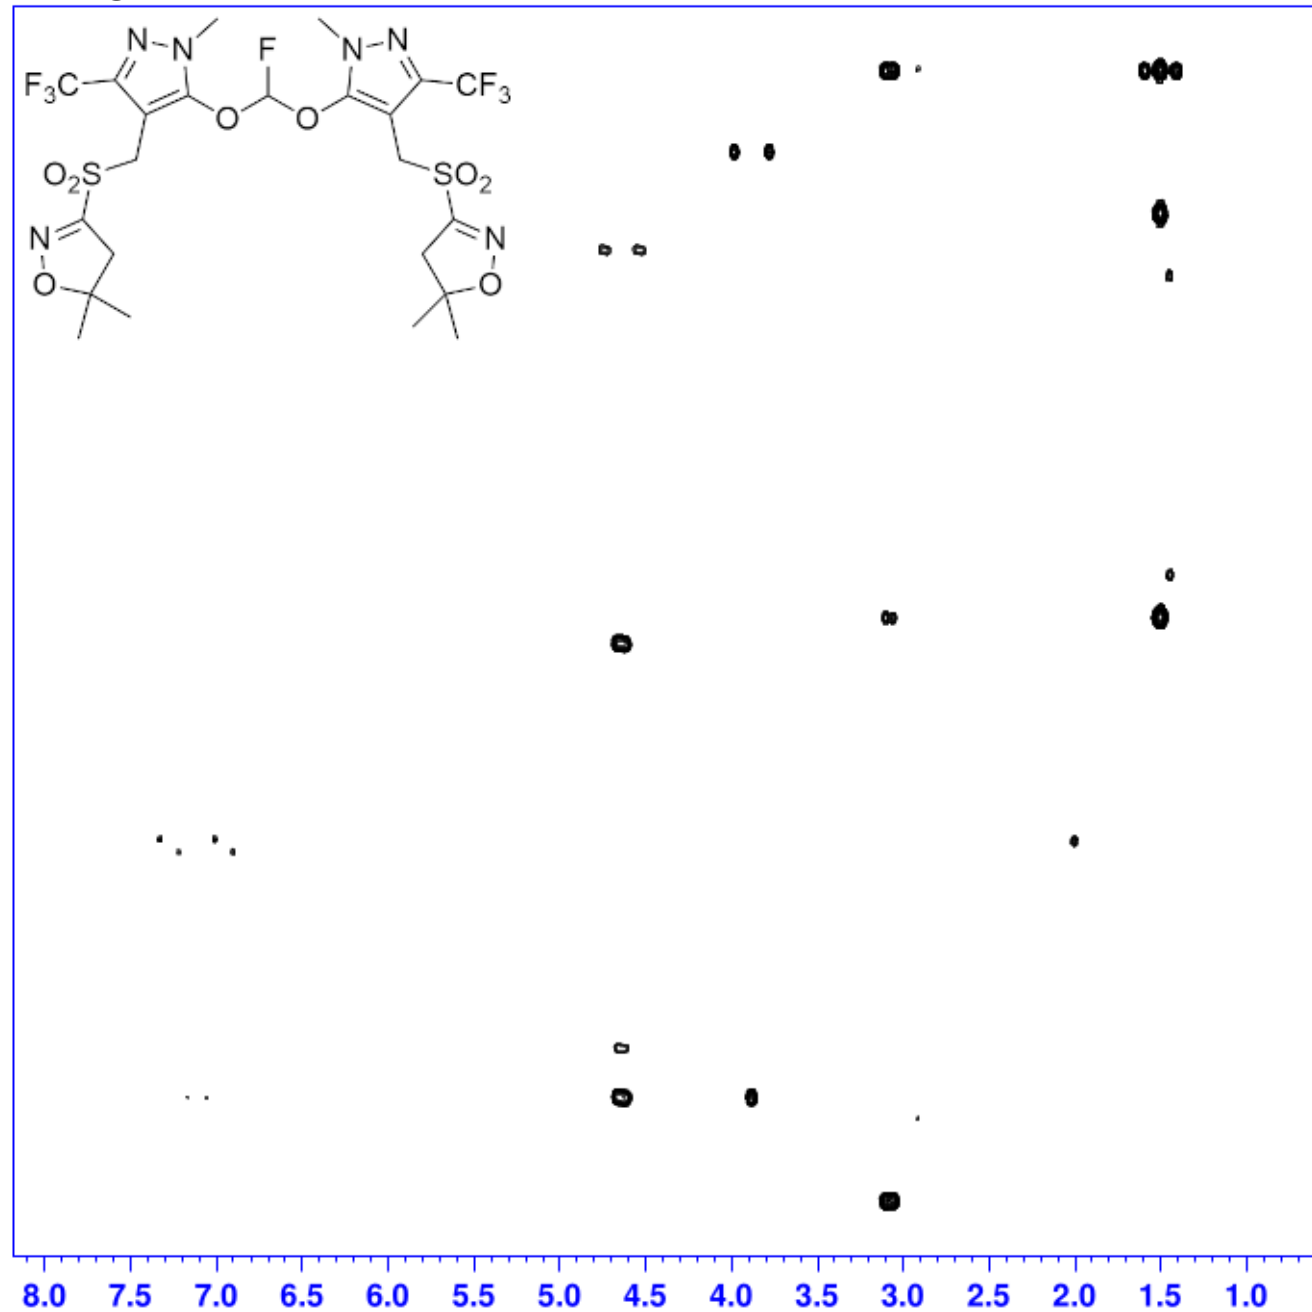

ppm

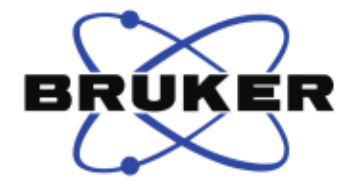

Current Data Parameters  
 NAME P7K3.9.19  
 EXPNO 6  
 PROCNO 1

F2 - Acquisition Parameters  
 Date\_ 20190903  
 Time 9.20 h  
 INSTRUM spect  
 PROBHD Z44908\_0030 (C  
 PULPROG hmbcgp1pndqf  
 TD 1024  
 SOLVENT CDCl3  
 NS 4  
 DS 2  
 SWH 5326.705 Hz  
 FIDRES 10.403720 Hz  
 AQ 0.0961195 sec  
 RG 2050  
 DW 93.867 usec  
 DE 10.00 usec  
 TE 300.0 K  
 CNST2 145.0000000  
 CNST13 8.0000000  
 D0 0.00000300 sec  
 D1 1.00000000 sec  
 D2 0.00344828 sec  
 D6 0.06250000 sec  
 D16 0.00020000 sec  
 IN0 0.00001960 sec  
 TDav 1  
 SFO1 700.4530820 MHz  
 NUC1 1H  
 P1 9.32 usec  
 P2 18.64 usec  
 PLW1 9.00000000 W  
 SFO2 176.1444968 MHz  
 NUC2 13C  
 P3 14.00 usec  
 PLW2 18.94499969 W  
 GPNAM[1] SINE.100  
 GPZ1 50.00 %  
 GPNAM[2] SINE.100  
 GPZ2 30.00 %  
 GPNAM[3] SINE.100  
 GPZ3 40.10 %  
 P16 1000.00 usec

F1 - Acquisition parameters  
 TD 128  
 SFO1 176.1445 MHz  
 FIDRES 398.596924 Hz  
 SW 144.825 ppm  
 FMODE QF

F2 - Processing parameters  
 SI 1024  
 SF 700.4500162 MHz  
 WDW QSINE  
 SSB 0  
 LB 0 Hz  
 GB 0  
 PC 1.00

F1 - Processing parameters  
 SI 512  
 MC2 QF  
 SF 176.1282756 MHz  
 WDW QSINE  
 SSB 0  
 LB 0 Hz  
 GB 0

ppm



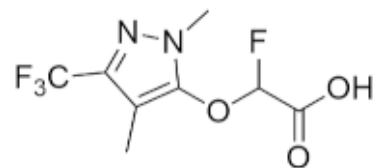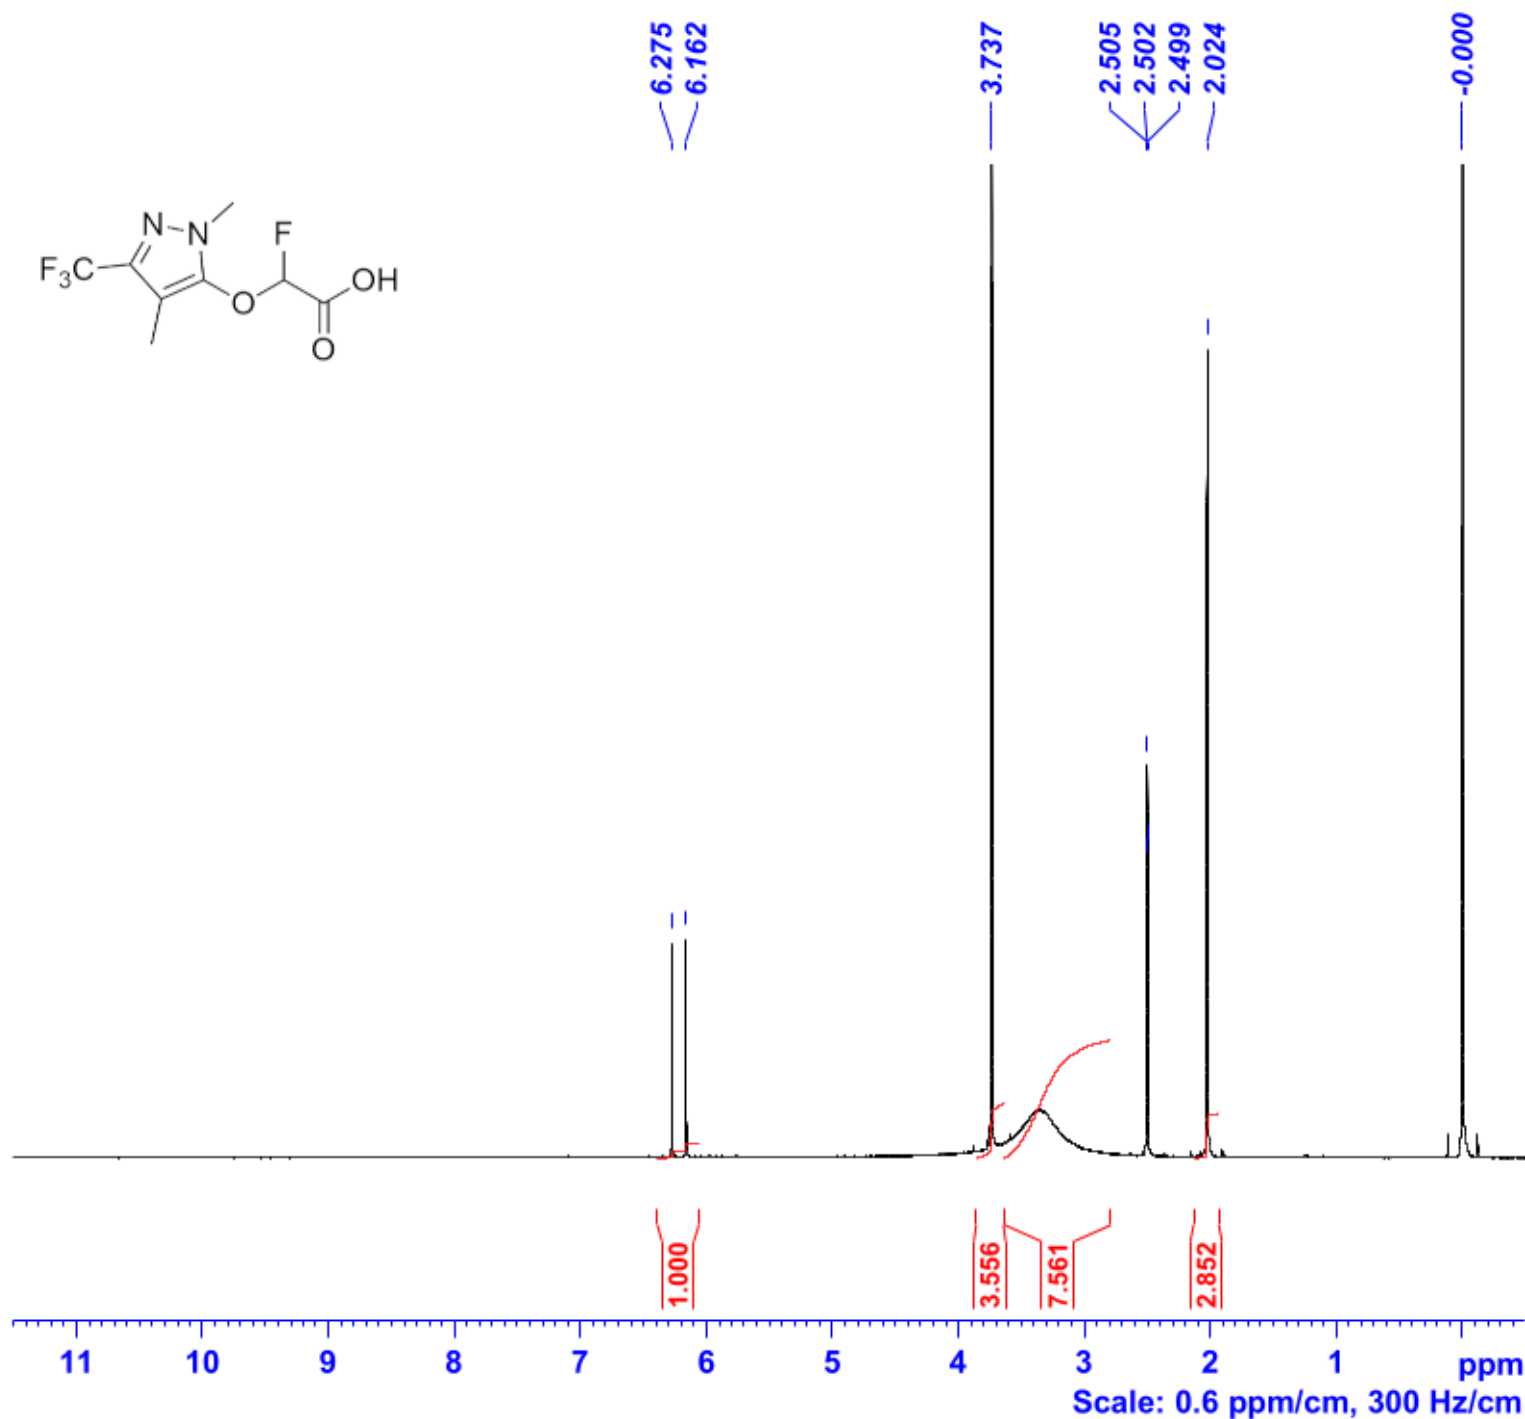

Current Data Parameters  
NAME P7K18.2.21  
EXPNO 11  
PROCNO 1

F2 - Acquisition Parameters  
Date\_ 20210220  
Time 3.36 h  
INSTRUM spect  
PROBHD 28420\_0082 (PH  
PULPROG zg30  
TD 65536  
SOLVENT DMSO  
NS 24  
DS 0  
SWH 7002.801 Hz  
FIDRES 0.213709 Hz  
AQ 4.6792703 sec  
RG 512  
DW 71.400 usec  
DE 6.50 usec  
TE 300.0 K  
D1 0.10000000 sec  
TDO 1  
SFO1 500.0430002 MHz  
NUC1 1H  
P1 10.32 usec  
PLW1 15.00000000 W

F2 - Processing parameters  
SI 65536  
SF 500.0400026 MHz  
WDW EM  
SSB 0  
LB 0.20 Hz  
GB 0  
PC 1.00



164.501  
164.264  
147.848  
137.248  
136.963  
136.676  
136.390  
124.707  
122.568  
120.430  
118.292  
105.591  
103.710  
101.739

40.027  
39.939  
39.863  
39.772  
39.699  
39.605  
39.438  
39.271  
39.104  
38.937  
35.113  
5.956  
0.195  
-0.003

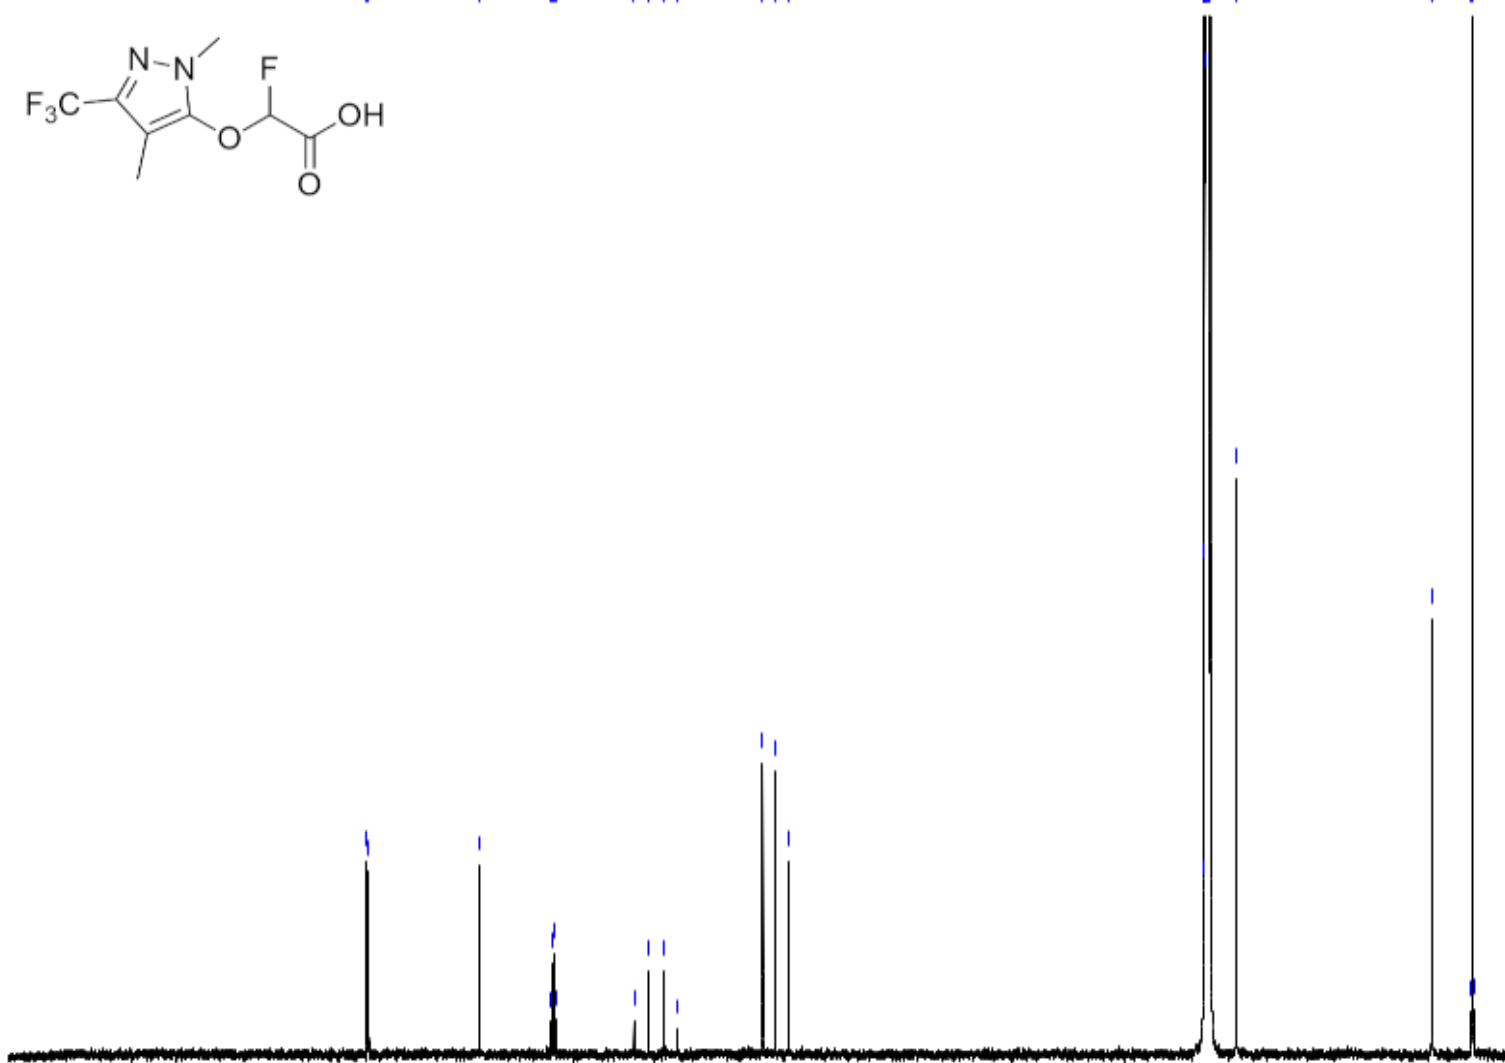

Current Data Parameters  
NAME P7K18.2.21  
EXPNO 10  
PROCNO 1

F2 - Acquisition Parameters  
Date\_ 20210220  
Time 3.34 h  
INSTRUM spect  
PROBHD 28420\_0082 (PH  
PULPROG zgdc30  
TD 65536  
SOLVENT DMSO  
NS 100000  
DS 0  
SWH 29761.904 Hz  
FIDRES 0.908261 Hz  
AQ 1.1010048 sec  
RG 2050  
DW 16.800 usec  
DE 6.50 usec  
TE 300.0 K  
D1 0.10000000 sec  
D11 0.03000000 sec  
TDO 1  
SFO1 125.7477315 MHz  
NUC1 13C  
P1 13.00 usec  
PLW1 55.00000000 W  
SFO2 500.0425002 MHz  
NUC2 1H  
CPDPRG[2] waltz16  
PCPD2 80.00 usec  
PLW2 15.00000000 W  
PLW12 0.24962001 W

F2 - Processing parameters  
SI 32768  
SF 125.7352290 MHz  
WDW EM  
SSB 0  
LB 2.00 Hz  
GB 0  
PC 1.00

200 180 160 140 120 100 80 60 40 20 ppm

Scale: 11.25 ppm/cm, 1415 Hz/cm

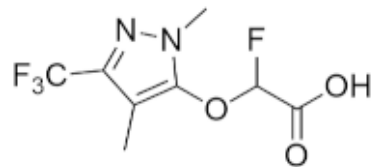

```

NAME          P7K2.9.19
EXPNO         1
PROCNO        1
Date_         20190902
Time          11.04
INSTRUM       spect
PROBHD        5 mm PABBO BB-
PULPROG       zg30
TD            32768
SOLVENT       CDC13
NS            8
DS            0
SWH           75187.969 Hz
FIDRES        2.294555 Hz
AQ            0.2179572 se
RG            71.8
DW            6.650 us
DE            6.32 us
TE            300.2 K
D1            0.10000000 se
TD0           1
  
```

```

===== CHANNEL f1 =====
NUC1          19F
P1            7.90 us
PL1           0.00 dB
SFO1          376.4419017 MHz
SI            32768
SF            376.4703092 MHz
WDW           EM
SSB           0
LB            0.50 Hz
GB            0
PC            1.00
  
```

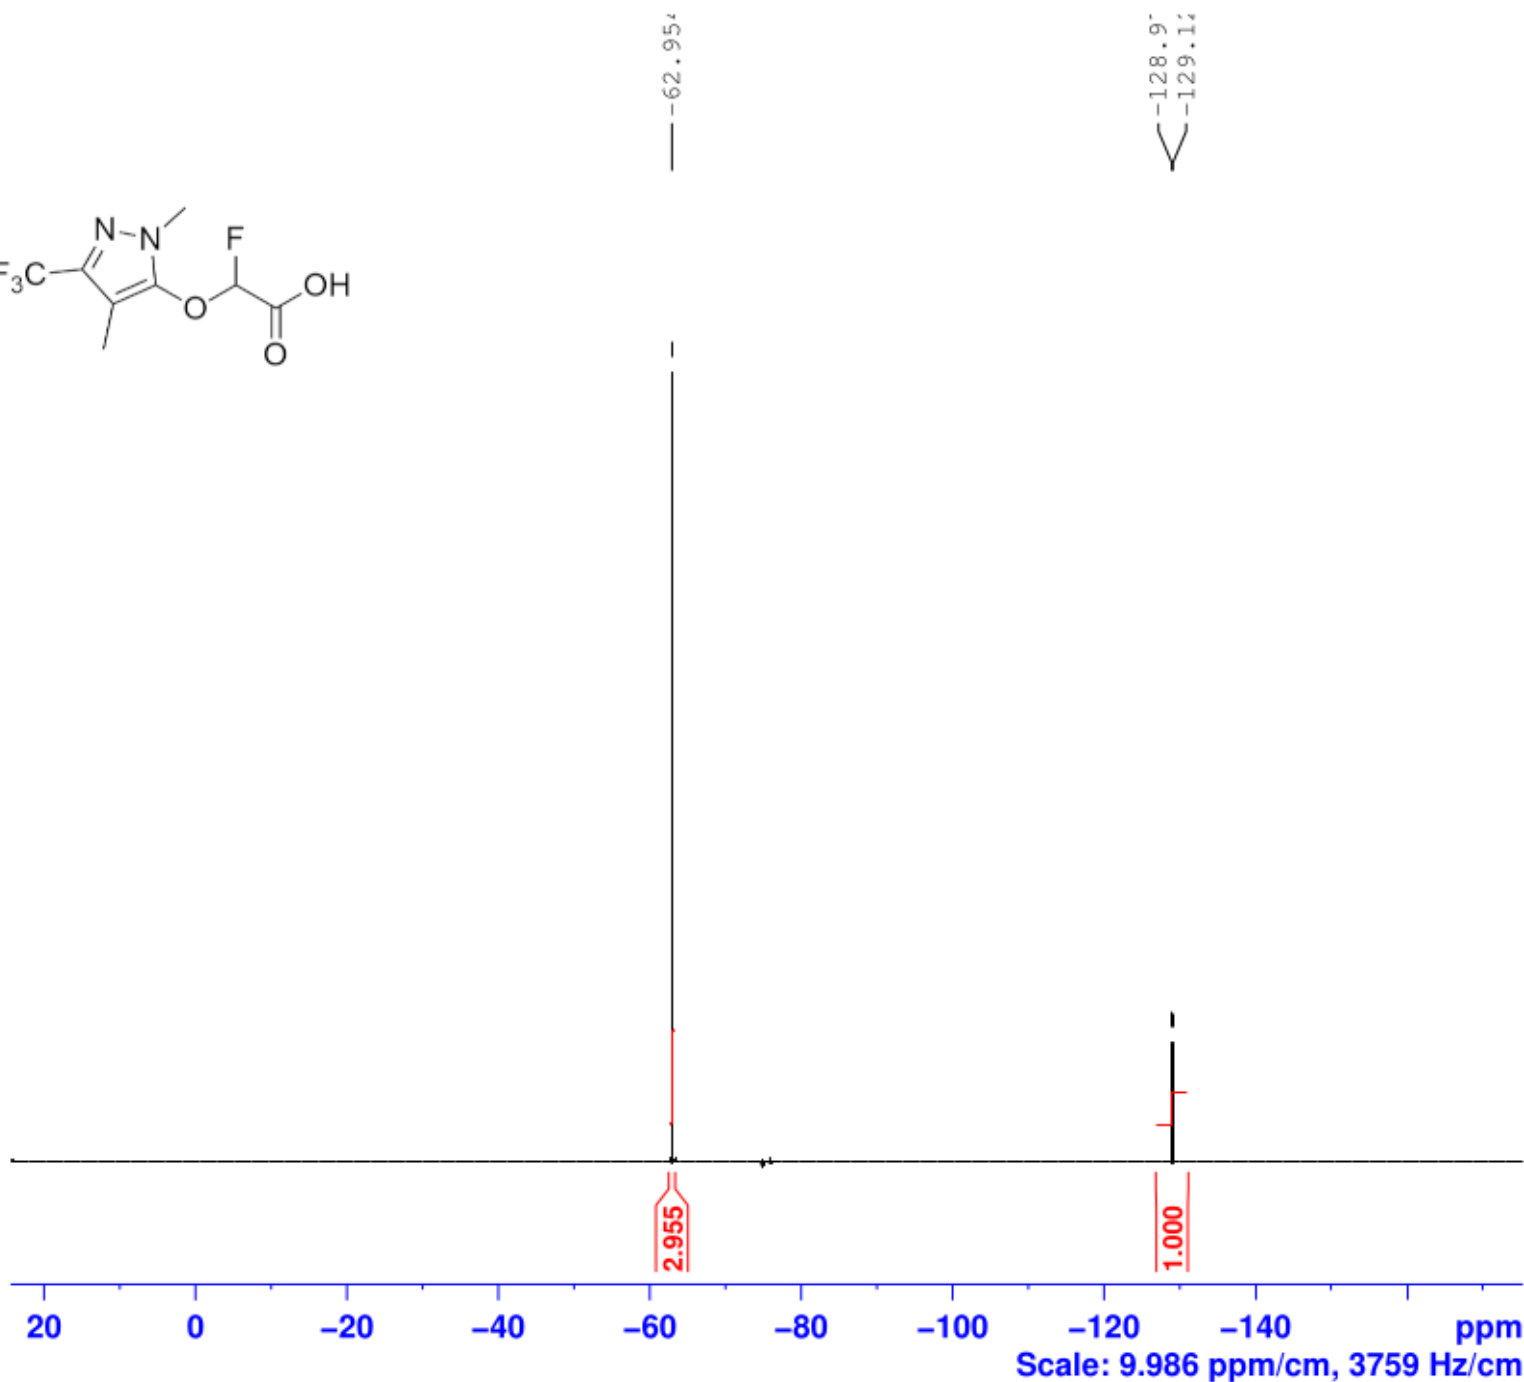

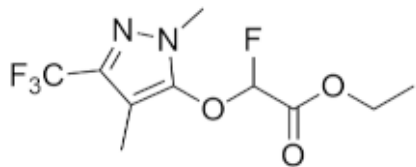

5.852  
5.710  
4.410  
4.392  
4.374  
4.356  
3.788  
2.097  
1.399  
1.381  
1.363  
0.000

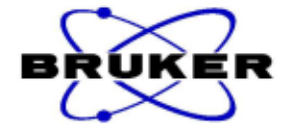

```

NAME          P7K15.2.21
EXPNO         15
PROCNO        1
Date_         20210216
Time          7.55
INSTRUM       spect
PROBHD        5 mm PABBO BB-
PULPROG       zg30
TD            65536
SOLVENT       CDCl3
NS            8
DS            0
SWH           7183.908 Hz
FIDRES        0.109618 Hz
AQ            4.5613556 sec
RG            20.2
DW            69.600 usec
DE            6.50 usec
TE            299.7 K
D1            0.10000000 sec
TD0           1
  
```

```

===== CHANNEL f1 =====
NUC1          1H
P1            10.10 usec
PL1           0.00 dB
SFO1          400.1032008 MHz
SI            32768
SF            400.0999574 MHz
WDW           FM
SSB           0
LB            0.00 Hz
GB            0
PC            1.00
  
```

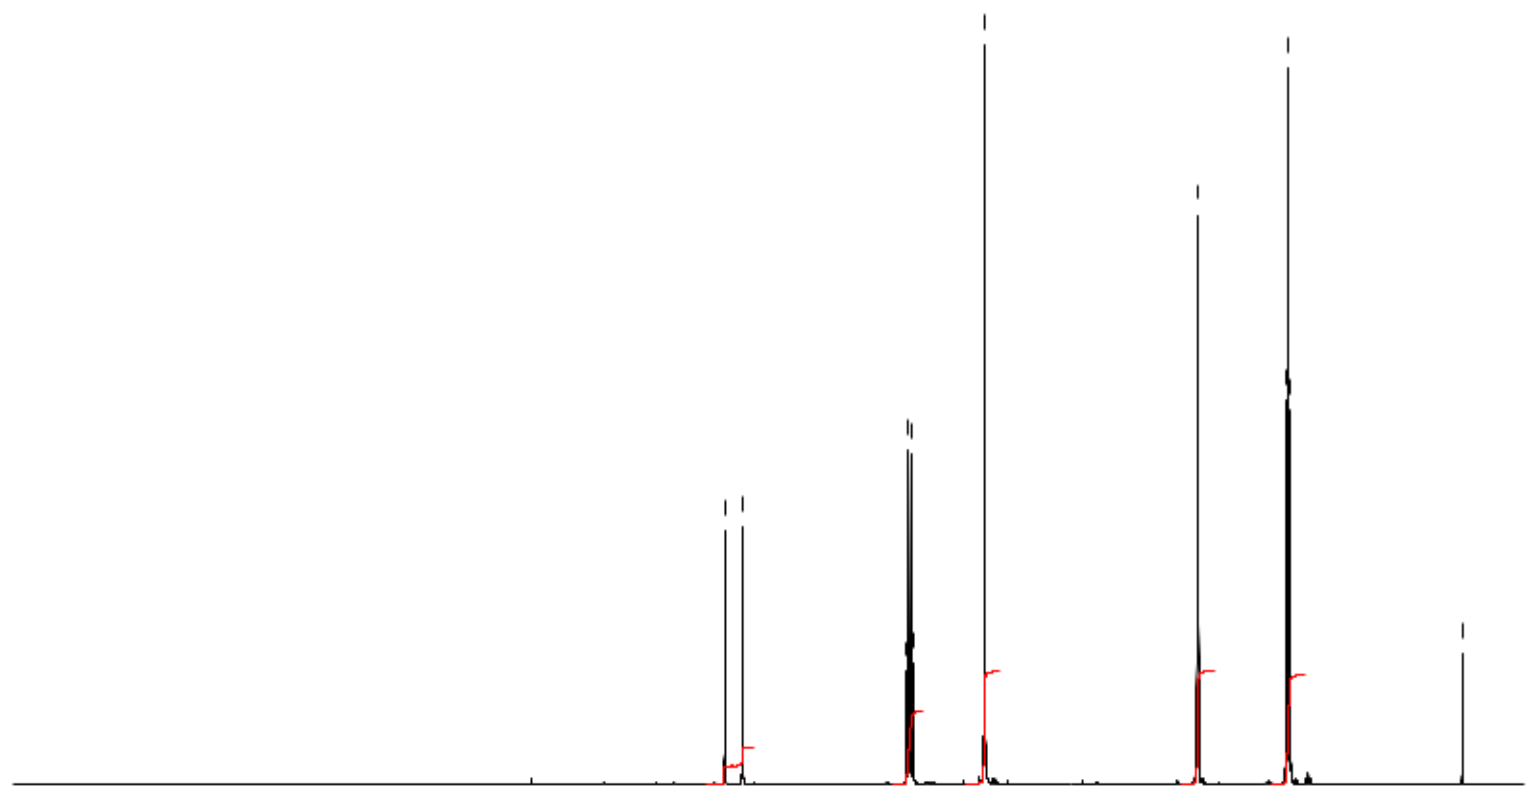

1.000  
1.983  
3.105  
3.082  
3.007

11 10 9 8 7 6 5 4 3 2 1 ppm  
Scale: 0.6 ppm/cm, 240.1 Hz/cm



163.235  
162.929  
148.289  
139.764  
139.399  
139.033  
138.668  
125.805  
123.130  
120.456  
117.781  
106.118  
103.730  
102.560  
77.847  
77.528  
77.208  
63.370  
35.442  
13.991  
6.336  
-0.000

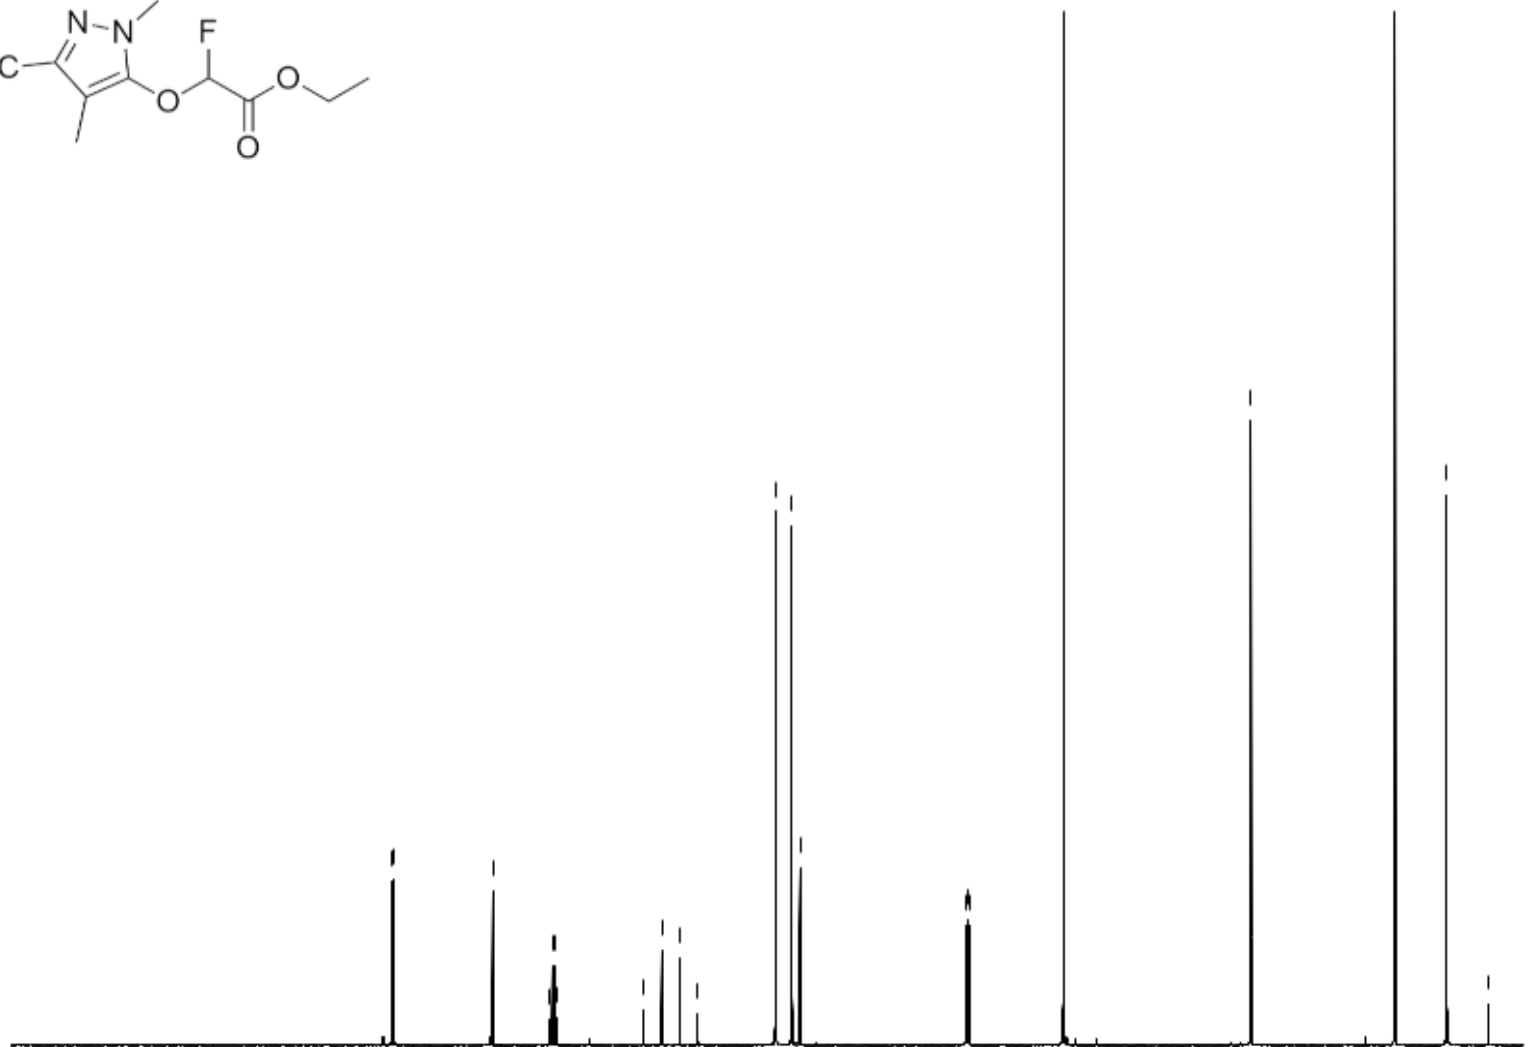

200 180 160 140 120 100 80 60 40 20 ppm  
Scale: 11.25 ppm/cm, 1132 Hz/cm

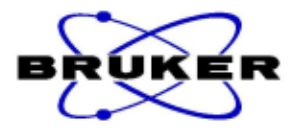

```

NAME          P7K15.2.21
EXPNO         14
PROCNO        1
Date_         20210216
Time          3.06
INSTRUM       spect
PROBHD        5 mm PABBO BB-
PULPROG       zgdc30
TD            32768
SOLVENT       CDC13
NS            40000
DS            0
SWH           24154.590 Hz
FIDRES        0.737140 Hz
AQ            0.6783476 se
RG            71.8
DW            20.700 us
DE            29.57 us
TE            299.9 K
D1            0.10000000 se
D11           0.03000000 se
TD0           1

===== CHANNEL f1 =====
NUC1           13C
P1             9.20 us
PL1            3.00 dB
SFO1          100.6152865 MHz

===== CHANNEL f2 =====
CPDPRG2       waltz16
NUC2           1H
PCPD2         80.00 us
PL2            0.00 dB
PL12          18.00 dB
SFO2          400.1009202 MHz
SI            32768
SF            100.6051785 MHz
WDW           EM
SSB           0
LB            2.00 Hz
GB            0
PC            1.00
  
```



NAME P7K15.2.21  
EXPNO 6  
PROCNO 1  
Date\_ 20210215  
Time 9.18  
INSTRUM spect  
PROBHD 5 mm PABBO BB-  
PULPROG zg30  
TD 32768  
SOLVENT CDCl3  
NS 48  
DS 0  
SWH 37664.785 Hz  
FIDRES 1.149438 Hz  
AQ 0.4350452 se  
RG 1290.2  
DW 13.275 us  
DE 6.32 us  
TE 300.0 K  
D1 0.10000000 se  
TD0 1

===== CHANNEL f1 =====  
NUC1 19F  
P1 7.90 us  
PL1 0.00 dB  
SFO1 376.4306076 MHz  
SI 32768  
SF 376.4703301 MHz  
WDW EM  
SSB 0  
LB 0.50 Hz  
GB 0  
PC 1.00

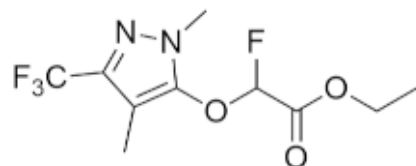

63.331

-129.45  
-129.64

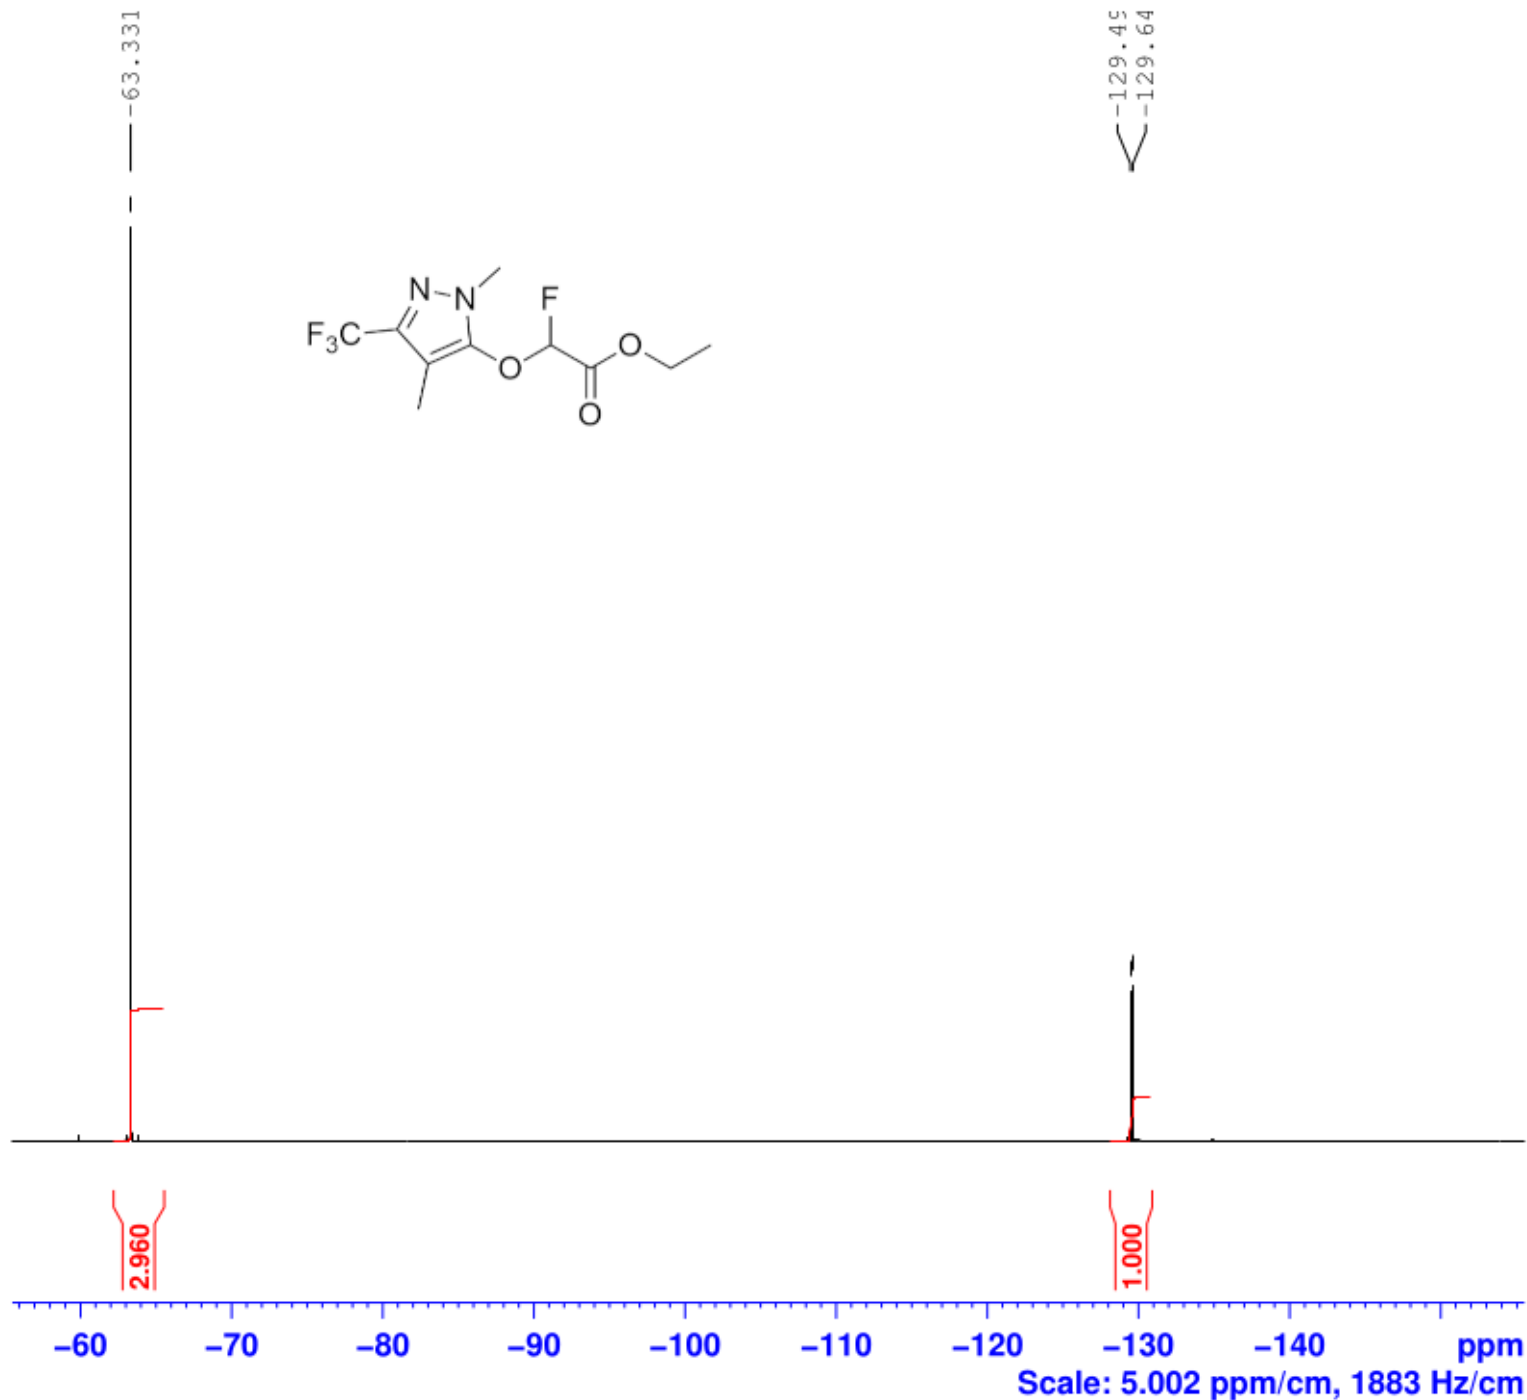

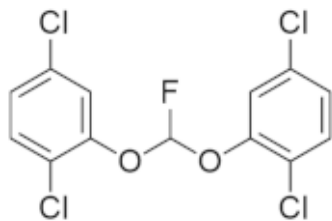

7.651  
7.640  
7.638  
7.634  
7.631  
7.629  
7.607  
7.582  
7.464  
7.346  
7.340  
7.324  
7.318

3.340

2.521  
2.517

0.000

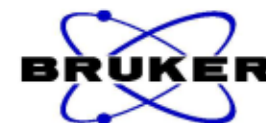

```

NAME          P7K26.1.21
EXPNO          4
PROCNO         1
Date_         20210126
Time          10.05
INSTRUM       spect
PROBHD        5 mm PABBO BB-
PULPROG       zg30
TD            65536
SOLVENT       DMSO
NS            24
DS            0
SWH           7183.908 Hz
FIDRES        0.109618 Hz
AQ            4.5613556 sec
RG            362
DW            69.600 usec
DE            6.50 usec
TE            299.9 K
D1            0.10000000 sec
TD0           1
  
```

```

===== CHANNEL f1 =====
NUC1           1H
P1             10.10 usec
PL1            0.00 dB
SFO1           400.1032008 MHz
SI             32768
SF             400.0999959 MHz
WDW            FM
SSB            0
LB             0.30 Hz
GB             0
PC             1.00
  
```

0.490  
2.858  
1.225  
0.516  
2.000

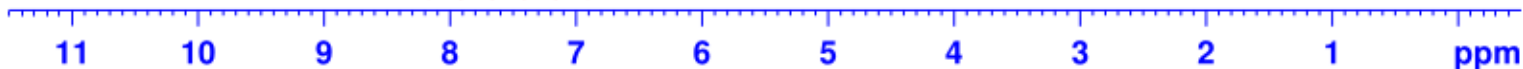

Scale: 0.6 ppm/cm, 240.1 Hz/cm



7.651  
7.640  
7.638  
7.634  
7.631  
7.629  
7.607  
7.582  
— 7.464  
7.346  
7.340  
7.324  
7.318

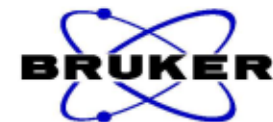

```

NAME          P7K26.1.21
EXPNO         4
PROCNO        1
Date_         20210126
Time          10.05
INSTRUM       spect
PROBHD        5 mm PABBO BB-
PULPROG       zg30
TD            65536
SOLVENT       DMSO
NS            24
DS            0
SWH           7183.908 Hz
FIDRES        0.109618 Hz
AQ            4.5613556 sec
RG            362
DW            69.600 usec
DE            6.50 usec
TE            299.9 K
D1            0.10000000 sec
TD0           1
  
```

```

===== CHANNEL f1 =====
NUC1           1H
P1             10.10 usec
PL1            0.00 dB
SFO1           400.1032008 MHz
SI             32768
SF             400.0999959 MHz
WDW            FM
SSB            0
LB             0.30 Hz
GB             0
PC             1.00
  
```

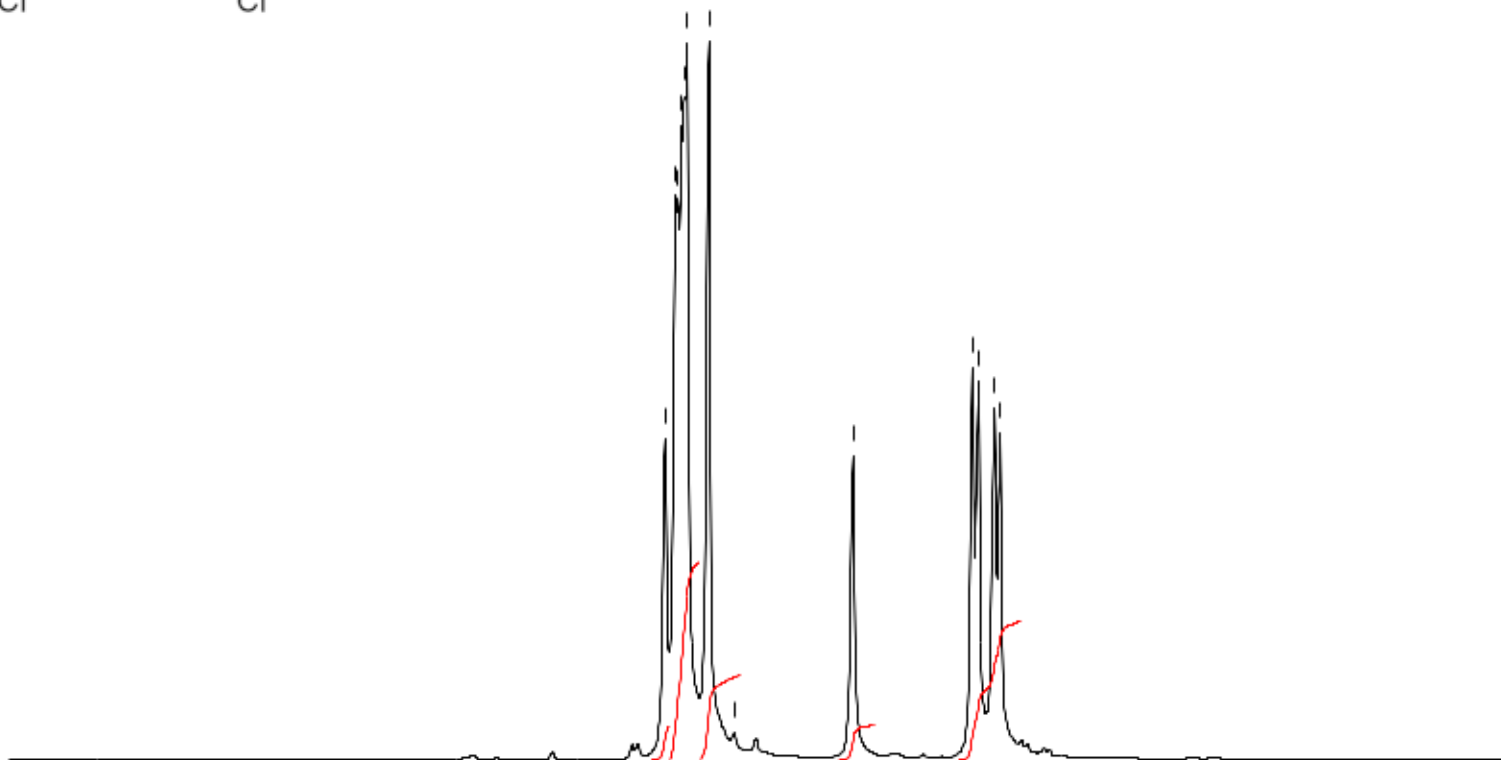

0.490  
2.858  
1.225  
0.516  
2.000

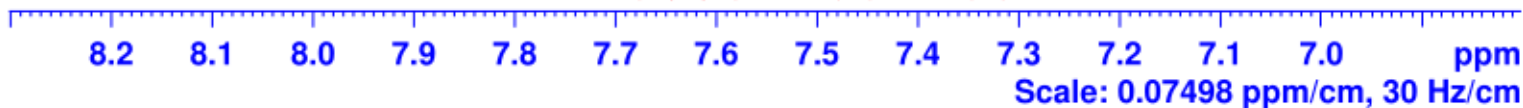



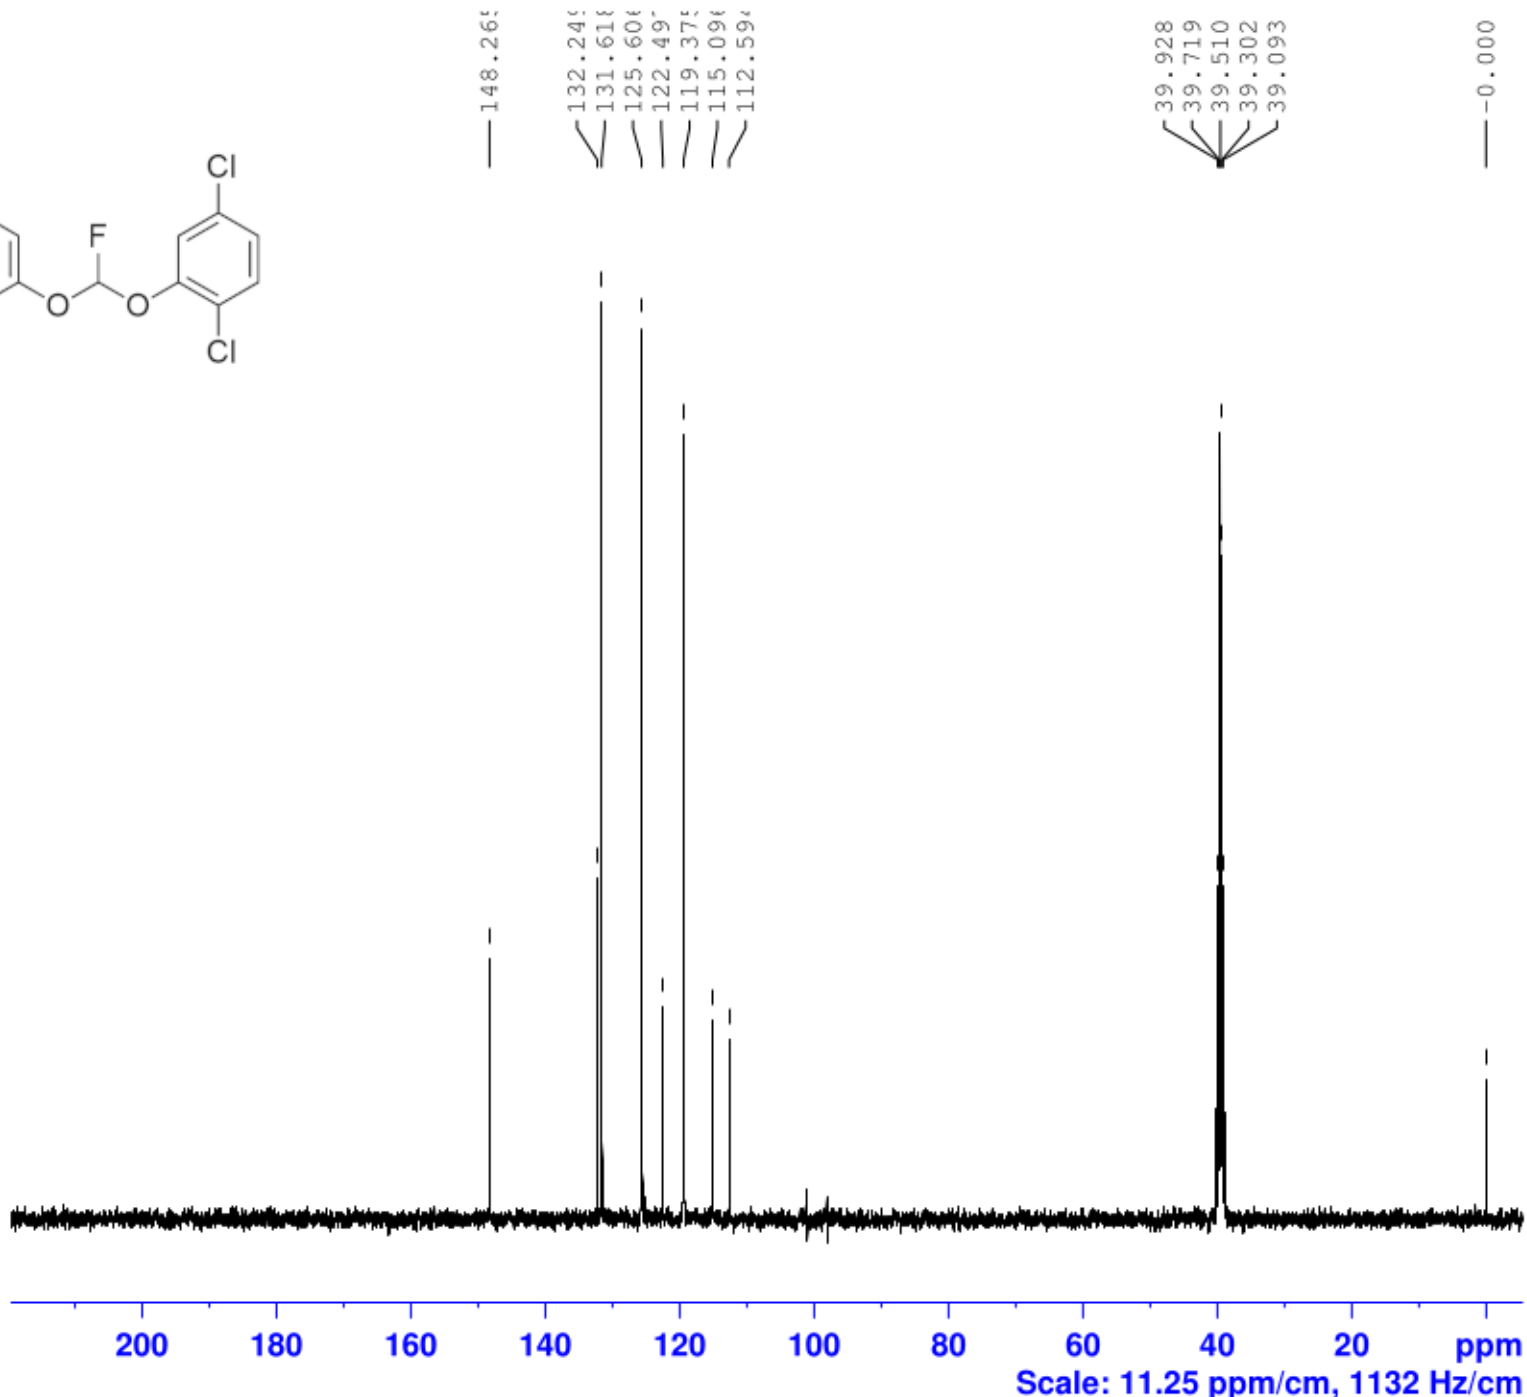

— 148.26  
 132.24  
 131.61  
 125.60  
 122.49  
 119.37  
 115.09  
 112.59  
 39.928  
 39.719  
 39.510  
 39.302  
 39.093  
 — 0.000



```

NAME          P7K26.1.21
EXPNO         7
PROCNO        1
Date_         20210126
Time          10.10
INSTRUM       spect
PROBHD        5 mm PABBO BB-
PULPROG       zgdc30
TD            32768
SOLVENT       DMSO
NS            1200
DS            0
SWH           24154.590 Hz
FIDRES        0.737140 Hz
AQ            0.6783476 se
RG            71.8
DW            20.700 us
DE            29.57 us
TE            300.5 K
D1            0.10000000 se
D11           0.03000000 se
TD0           1

===== CHANNEL f1 =====
NUC1           13C
P1             9.20 us
PL1            3.00 dB
SFO1           100.6152865 MHz

===== CHANNEL f2 =====
CPDPRG2       waltz16
NUC2           1H
PCPD2          80.00 us
PL2            0.00 dB
PL12           18.00 dB
SFO2           400.1009202 MHz
SI            32768
SF            100.6052769 MHz
WDW            EM
SSB            0
LB             2.00 Hz
GB             0
PC             1.00
  
```

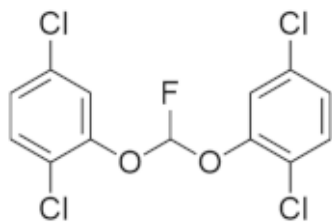

--87.01!  
--87.21!



NAME P7K26.1.21  
EXPNO 6  
PROCNO 1  
Date\_ 20210126  
Time 10.06  
INSTRUM spect  
PROBHD 5 mm PABBO BB-  
PULPROG zg30  
TD 32768  
SOLVENT DMSO  
NS 24  
DS 0  
SWH 11261.262 Hz  
FIDRES 0.343666 Hz  
AQ 1.4549491 se  
RG 1625.5  
DW 44.400 us  
DE 6.32 us  
TE 299.9 K  
D1 0.10000000 se  
TD0 1

==== CHANNEL f1 =====  
NUC1 19F  
P1 7.90 us  
PL1 0.00 dB  
SFO1 376.4381370 MHz  
SI 32768  
SF 376.4703301 MHz  
WDW EM  
SSB 0  
LB 0.50 Hz  
GB 0  
PC 1.00

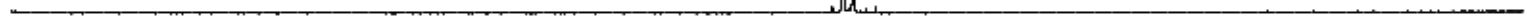

-75 -80 -85 -90 -95 ppm

Scale: 1.496 ppm/cm, 563.1 Hz/cm

# HMBC

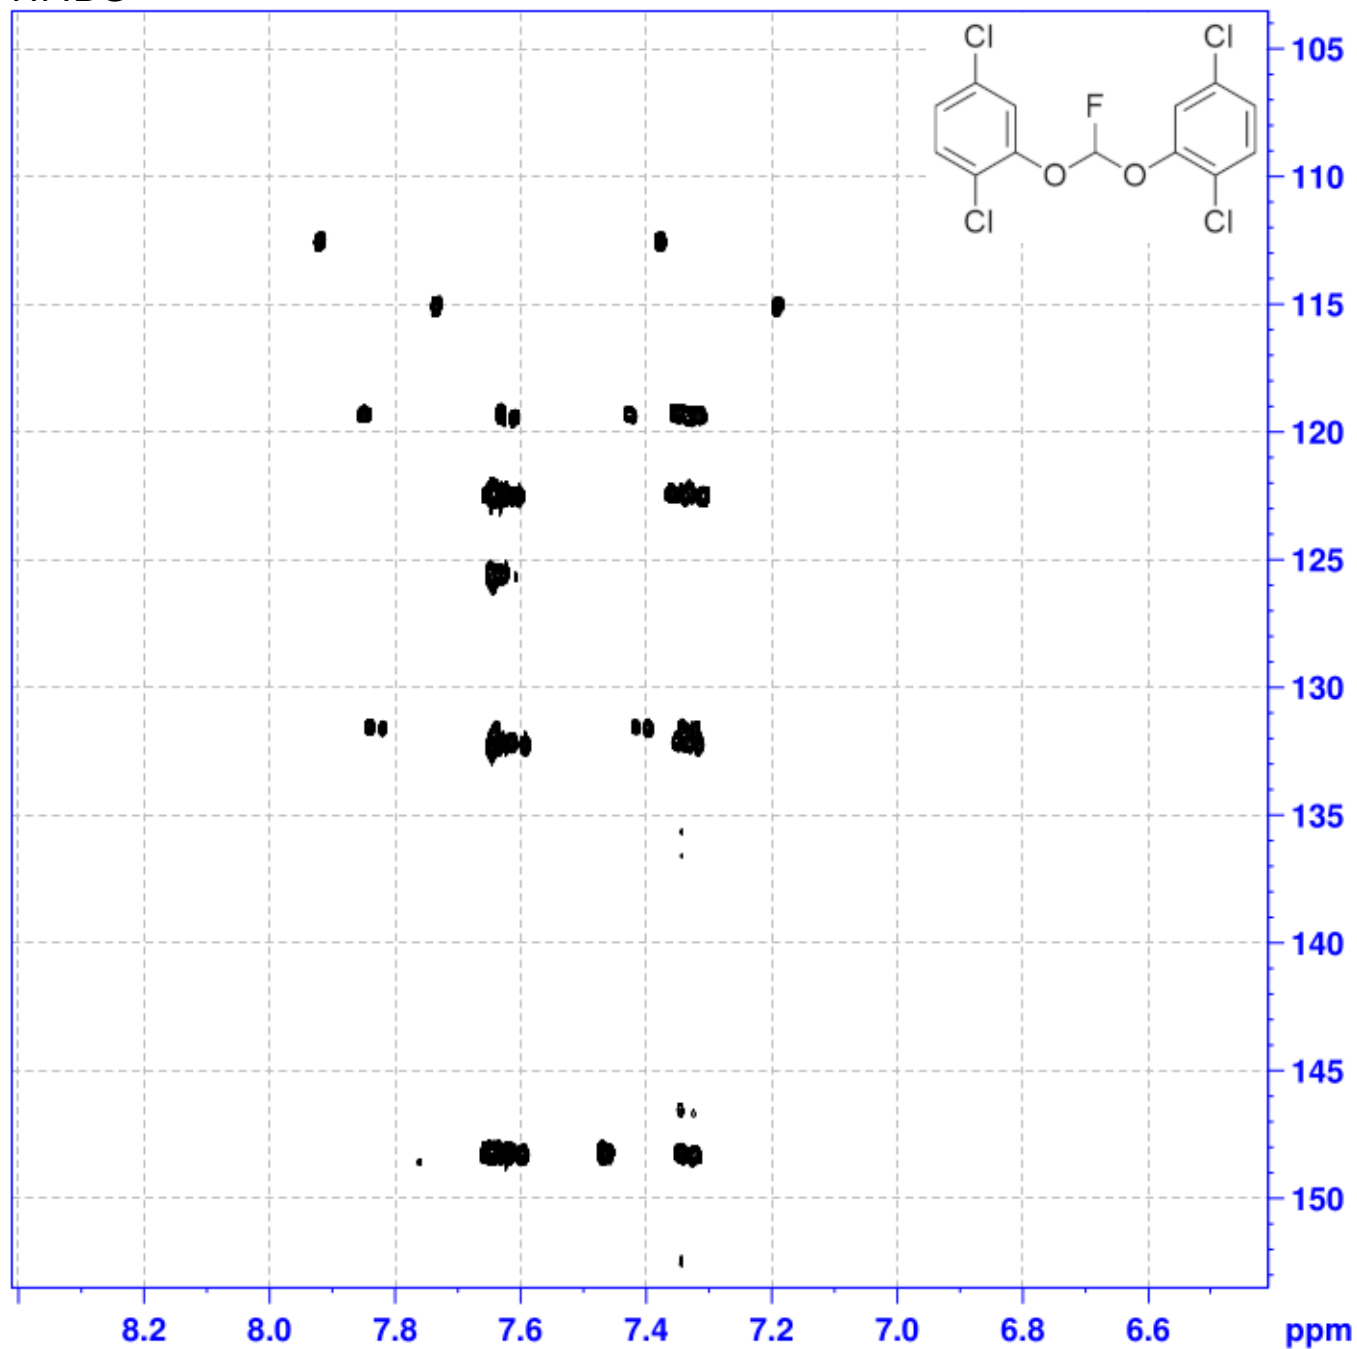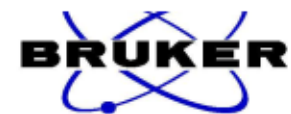

```

NAME          P7K26.1.21
EXPNO         11
PROCNO        1
Date_         20210126
Time          10.56
INSTRUM       spect
PROBHD        5 mm PABBO BB-
PULPROG       hmbcqp1pndqf
TD            1024
SOLVENT       DMSO
NS            8
DS            2
SWH           801.282 Hz
FIDRES        0.782502 Hz
AQ            0.6390260 sec
RG            46341
DW            624.000 usec
DE            241.25 usec
TE            299.2 K
CNST2         145.0000000
CNST13        8.0000000
D0            0.00000300 sec
D1            1.00000000 sec
D2            0.00344828 sec
D6            0.06250000 sec
D16           0.00020000 sec
INO           0.00009940 sec

----- CHANNEL f1 -----
NUC1          1H
P1            10.10 usec
P2            20.20 usec
PL1           0.00 dB
SFO1          400.1029607 MHz

----- CHANNEL f2 -----
NUC2          13C
P3            9.20 usec
PL2           0.00 dB
SFO2          100.6182041 MHz

===== GRADIENT CHANNEL =====
GPNAM1       sine.100
GPNAM2       sine.100
GPNAM3       sine.100
GPZ1         50.00 %
GPZ2         30.00 %
GPZ3         40.10 %
PL6          1000.00 usec
ND0          2
TD           128
SFO1         100.6182 MHz
FIDRES       39.303986 Hz
SW           50.000 ppm
FmMODE       QF
SI           1024
SF           400.0999959 MHz
WDW          QSINE
SSB          0
LB           0.00 Hz
GB           0
PC           1.00
SI           512
MC2          QF
SF           100.6052769 MHz
WDW          QSINE
SSB          0
LB           0.00 Hz
GB           0
    
```

# HMQC

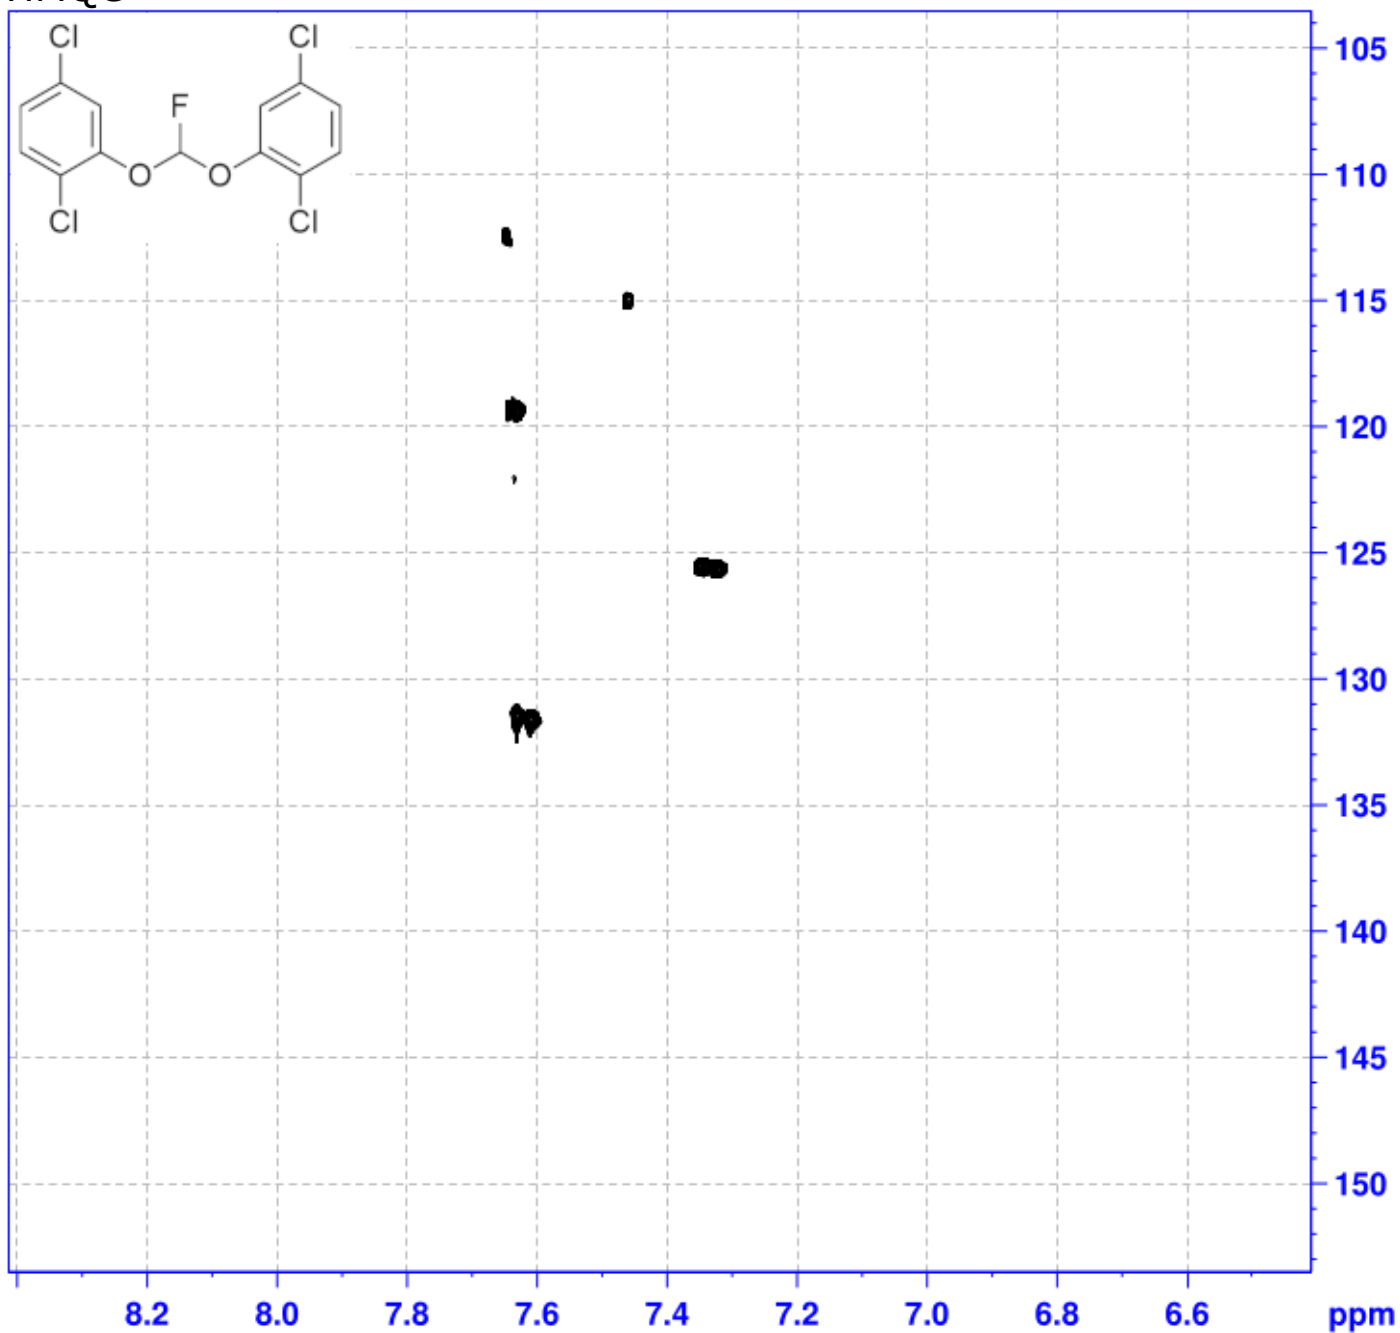

```

NAME          P7K26.1.21
EXPNO         10
PROCNO        1
Date_         20210126
Time_         10.41
INSTRUM       spect
PROBHD        5 mm PABBO BB-
PULPROG       hmqcpgqf
TD            1024
SOLVENT       DMSO
NS            4
DS            2
SWH           801.282 Hz
FIDRES        0.782502 Hz
AQ            0.6390260 sec
RG            46341
DW            624.000 usec
DE            241.25 usec
TE            300.1 K
CNST2         145.0000000
D0            0.00000300 sec
D1            1.00000000 sec
D2            0.00344828 sec
D12           0.00002000 sec
D13           0.00000400 sec
D16           0.00020000 sec
IN0           0.00009940 sec
    
```

```

===== CHANNEL f1 =====
NUC1          1H
P1            10.50 usec
P2            21.00 usec
PL1           0.00 dB
SFO1          400.1029607 MHz
    
```

```

===== CHANNEL f2 =====
CPDPRG2       gaXP
NUC2          13C
P3            9.10 usec
PCPD2         55.00 usec
PL2           3.00 dB
PL12          18.40 dB
SFO2          100.6182041 MHz
    
```

```

----- GRADIENT CHANNEL -----
GPNAM1        sine.100
GPNAM2        sine.100
GPNAM3        sine.100
GPZ1          50.00 %
GPZ2          30.00 %
GPZ3          40.10 %
P16           1000.00 usec
ND0           2
TD            128
SFO1          100.6182 MHz
FIDRES        39.303986 Hz
SW            50.000 ppm
FnMODE        QF
SI            1024
SF            400.0999959 MHz
WDW           QSINE
SSB           0
LB            0.00 Hz
GB            0
PC            1.00
SI            512
MC2           QF
SF            100.6052769 MHz
WDW           QSINE
SSB           0
LB            0.00 Hz
GB            0
    
```

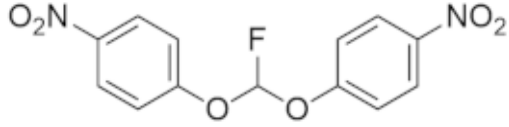

8.280  
8.258  
7.424  
7.401  
7.295  
7.273  
6.938  
6.758

3.484

2.042  
1.691  
1.275  
1.258

0.092  
-0.000

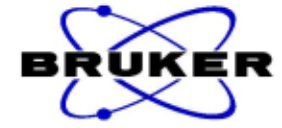

```

NAME          P7K1.2.21
EXPNO         1
PROCNO        1
Date_         20210201
Time          8.35
INSTRUM       spect
PROBHD        5 mm PABBO BB-
PULPROG       zg30
TD            65536
SOLVENT       CDCl3
NS            24
DS            0
SWH           7183.908 Hz
FIDRES        0.109618 Hz
AQ            4.5613556 sec
RG            114
DW            69.600 usec
DE            6.50 usec
TE            299.9 K
D1            0.10000000 sec
TD0           1
  
```

```

===== CHANNEL f1 =====
NUC1           1H
P1             10.10 usec
PL1            0.00 dB
SFO1          400.1032008 MHz
SI            32768
SF            400.1000013 MHz
WDW            FM
SSB            0
LB            0.30 Hz
GB            0
PC            1.00
  
```

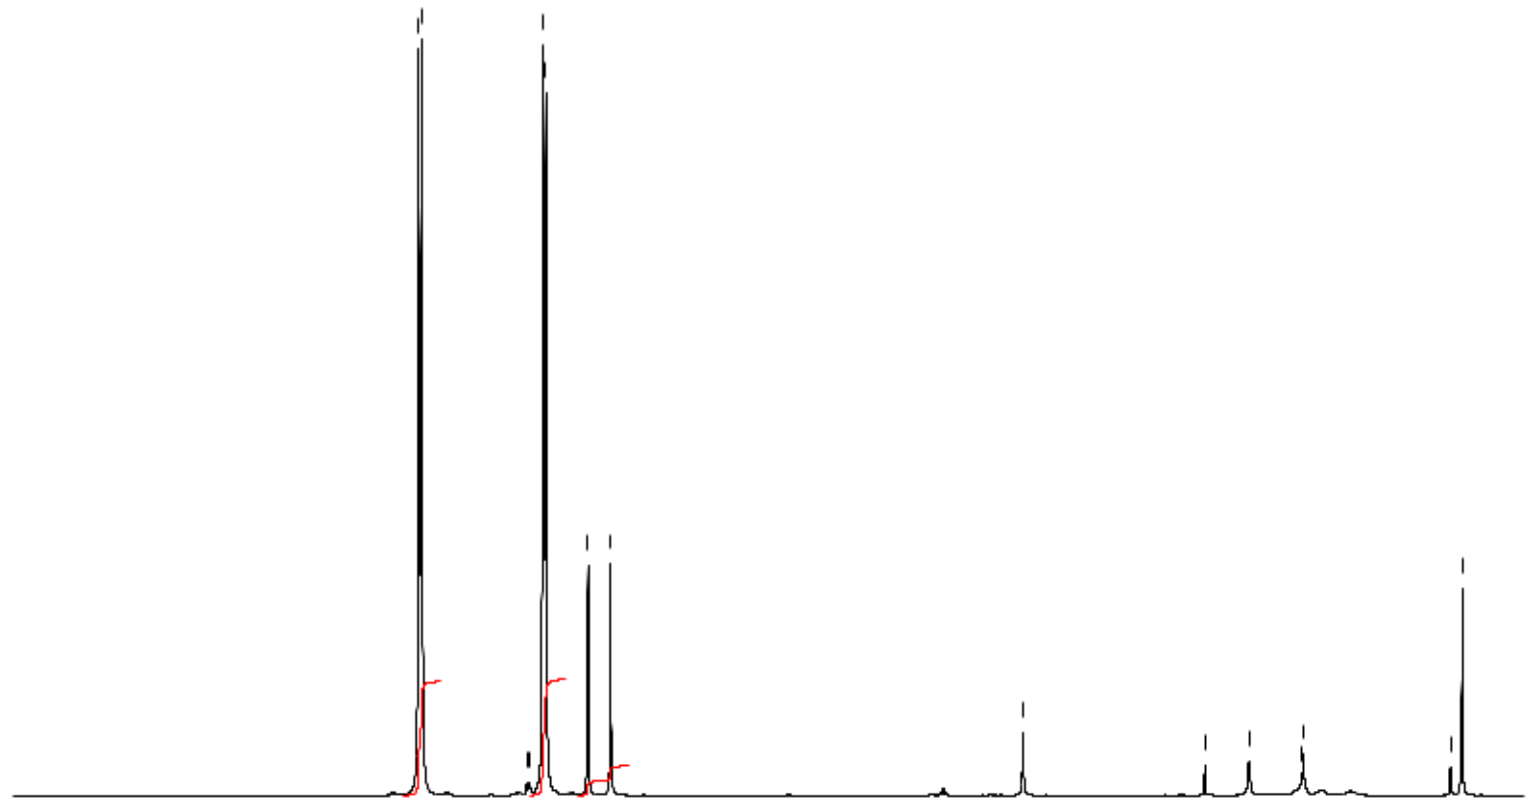

4.000  
4.063  
1.035

11 10 9 8 7 6 5 4 3 2 1 ppm  
Scale: 0.6 nm/cm. 240.1 Hz/cm

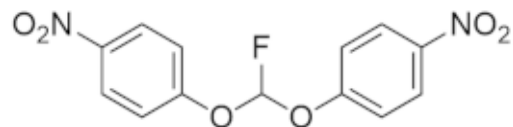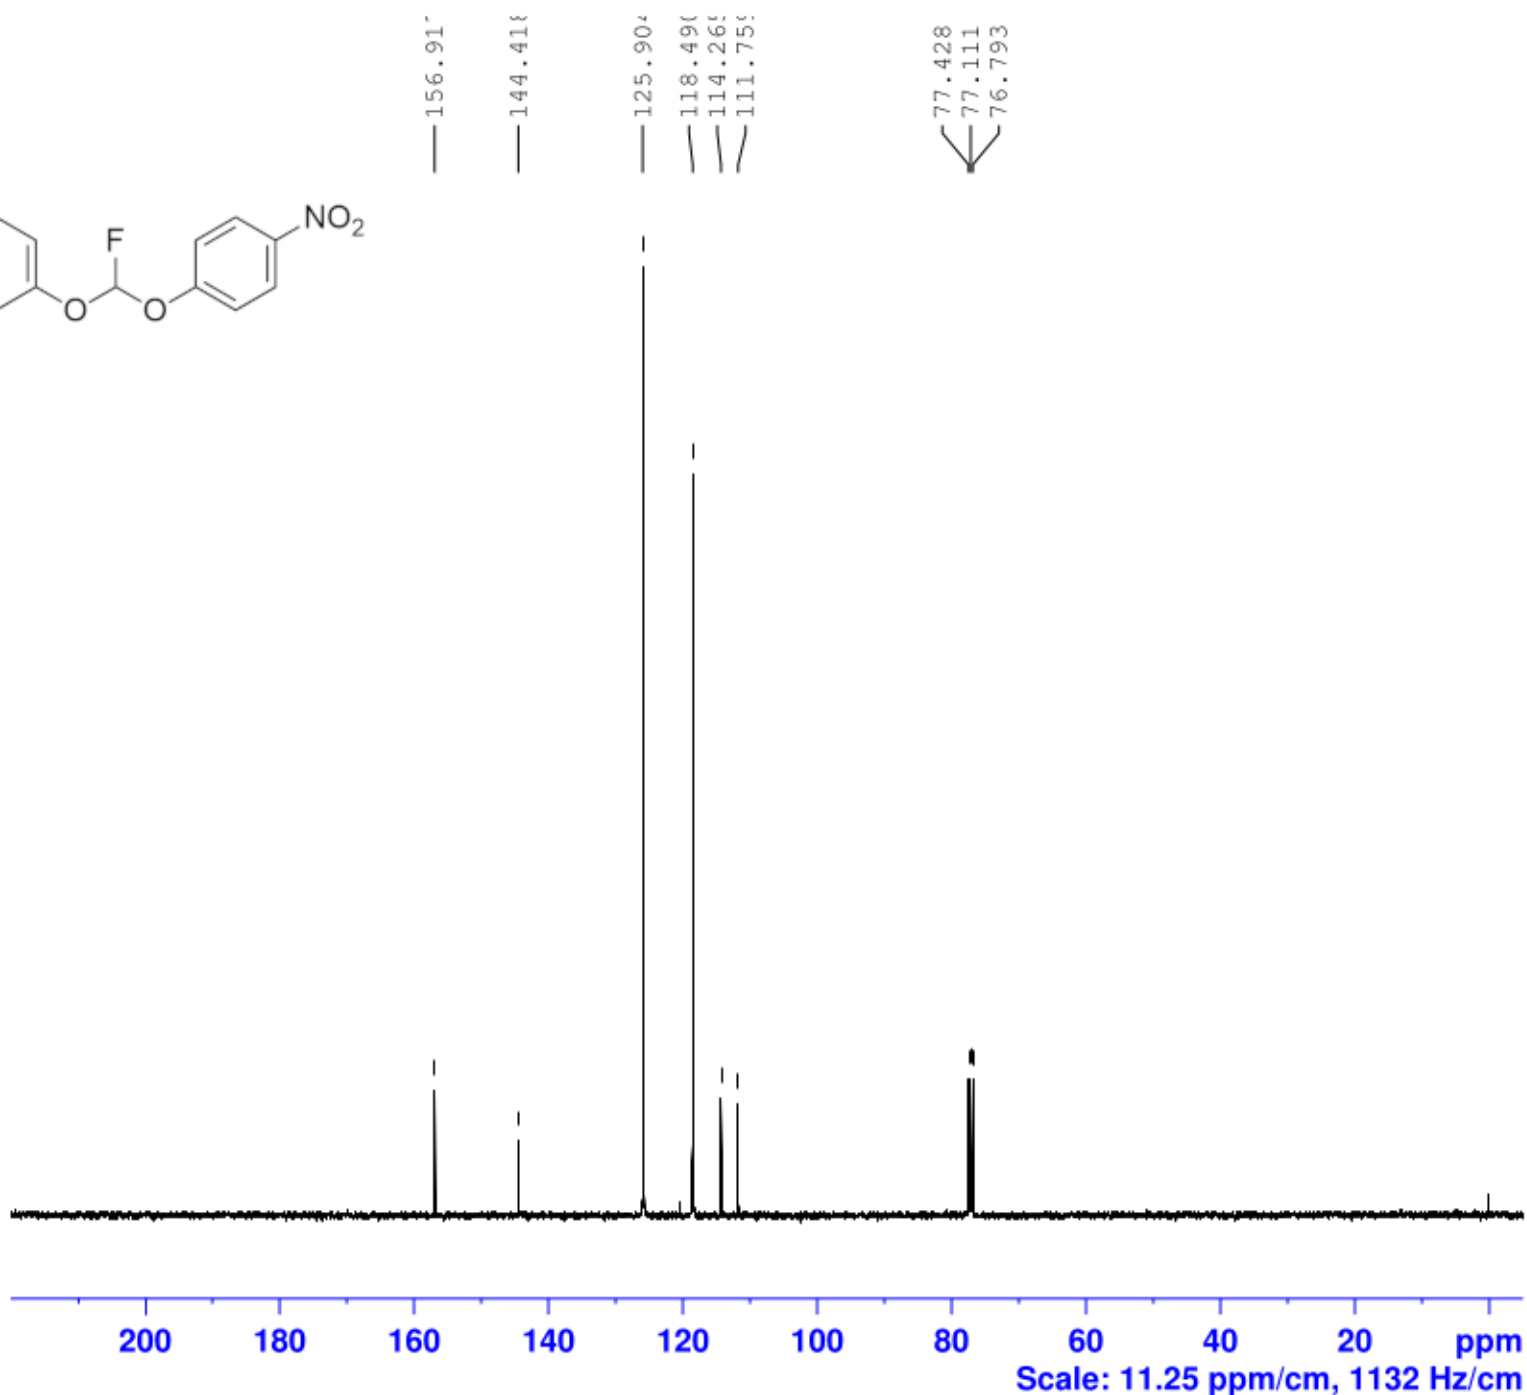

NAME P7K1.2.21  
EXPNO 3  
PROCNO 1  
Date\_ 20210201  
Time 8.39  
INSTRUM spect  
PROBHD 5 mm PABBO BB-  
PULPROG zgdc30  
TD 32768  
SOLVENT CDCl3  
NS 1000  
DS 0  
SWH 24154.590 Hz  
FIDRES 0.737140 Hz  
AQ 0.6783476 se  
RG 71.8  
DW 20.700 us  
DE 29.57 us  
TE 300.5 K  
D1 0.10000000 se  
D11 0.03000000 se  
TD0 1

=====  
CHANNEL f1  
=====  
NUC1 13C  
P1 9.20 us  
PL1 3.00 dB  
SFO1 100.6152865 MHz

=====  
CHANNEL f2  
=====  
CPDPRG2 waltz16  
NUC2 1H  
PCPD2 80.00 us  
PL2 0.00 dB  
PL12 18.00 dB  
SFO2 400.1009202 MHz  
SI 32768  
SF 100.6052219 MHz  
WDW EM  
SSB 0  
LB 2.00 Hz  
GB 0  
PC 1.00



85.672  
85.862

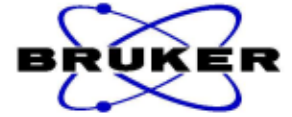

```

NAME          P7K1.2.21
EXPNO         2
PROCNO       1
Date_        20210201
Time         8.36
INSTRUM      spect
PROBHD       5 mm PABBO BB-
PULPROG      zg30
TD           32768
SOLVENT      CDC13
NS           8
DS           0
SWH          15060.241 Hz
FIDRES       0.459602 Hz
AQ           1.0879476 se
RG           2580.3
DW           33.200 us
DE           6.32 us
TE           299.9 K
D1           0.10000000 se
TDO          1
  
```

```

===== CHANNEL f1 =====
NUC1          19F
P1            7.90 us
PL1           0.00 dB
SFO1         376.4400194 MHz
SI            32768
SF           376.4703301 MHz
WDW           EM
SSB           0
LB            0.50 Hz
GB            0
PC            1.00
  
```

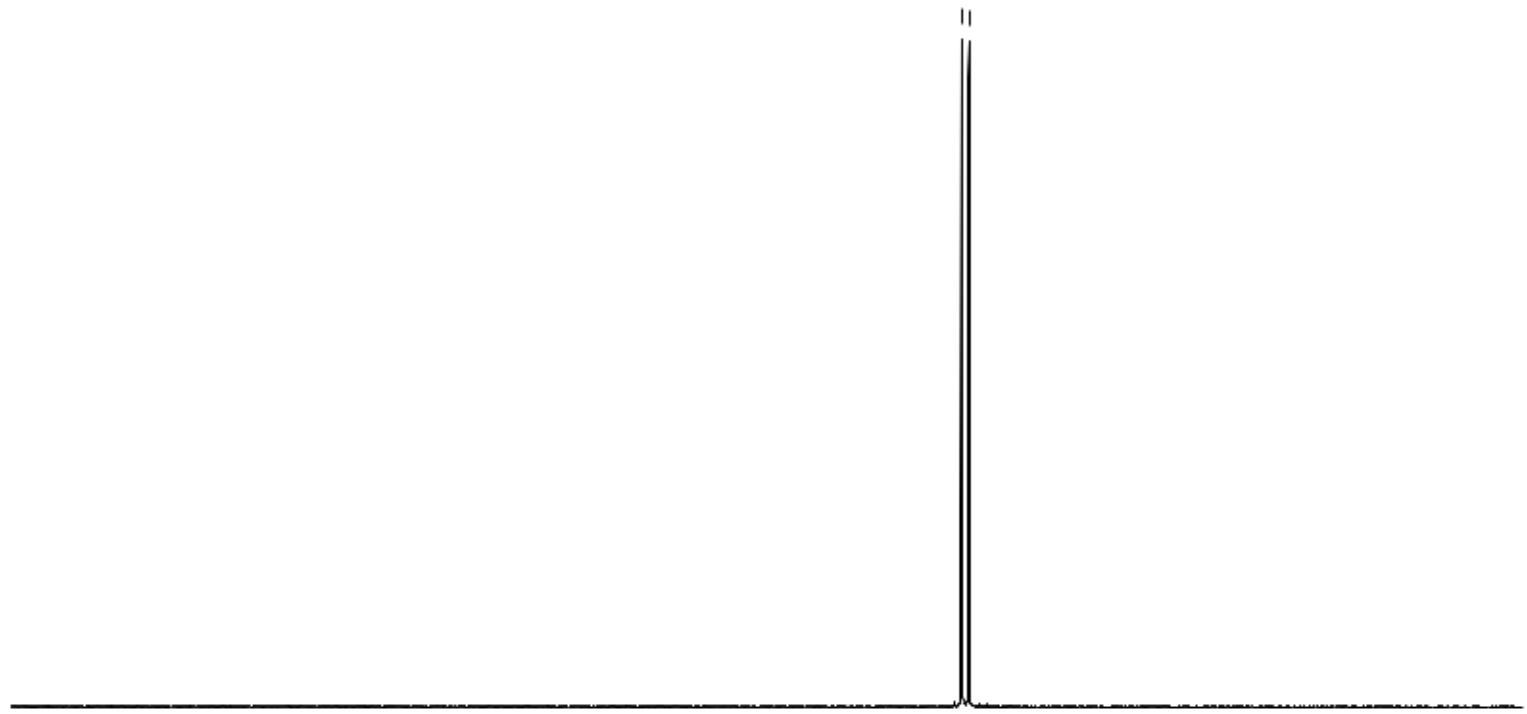

-65      -70      -75      -80      -85      -90      -95      ppm  
Scale: 2 ppm/cm, 753 Hz/cm

# HMQC

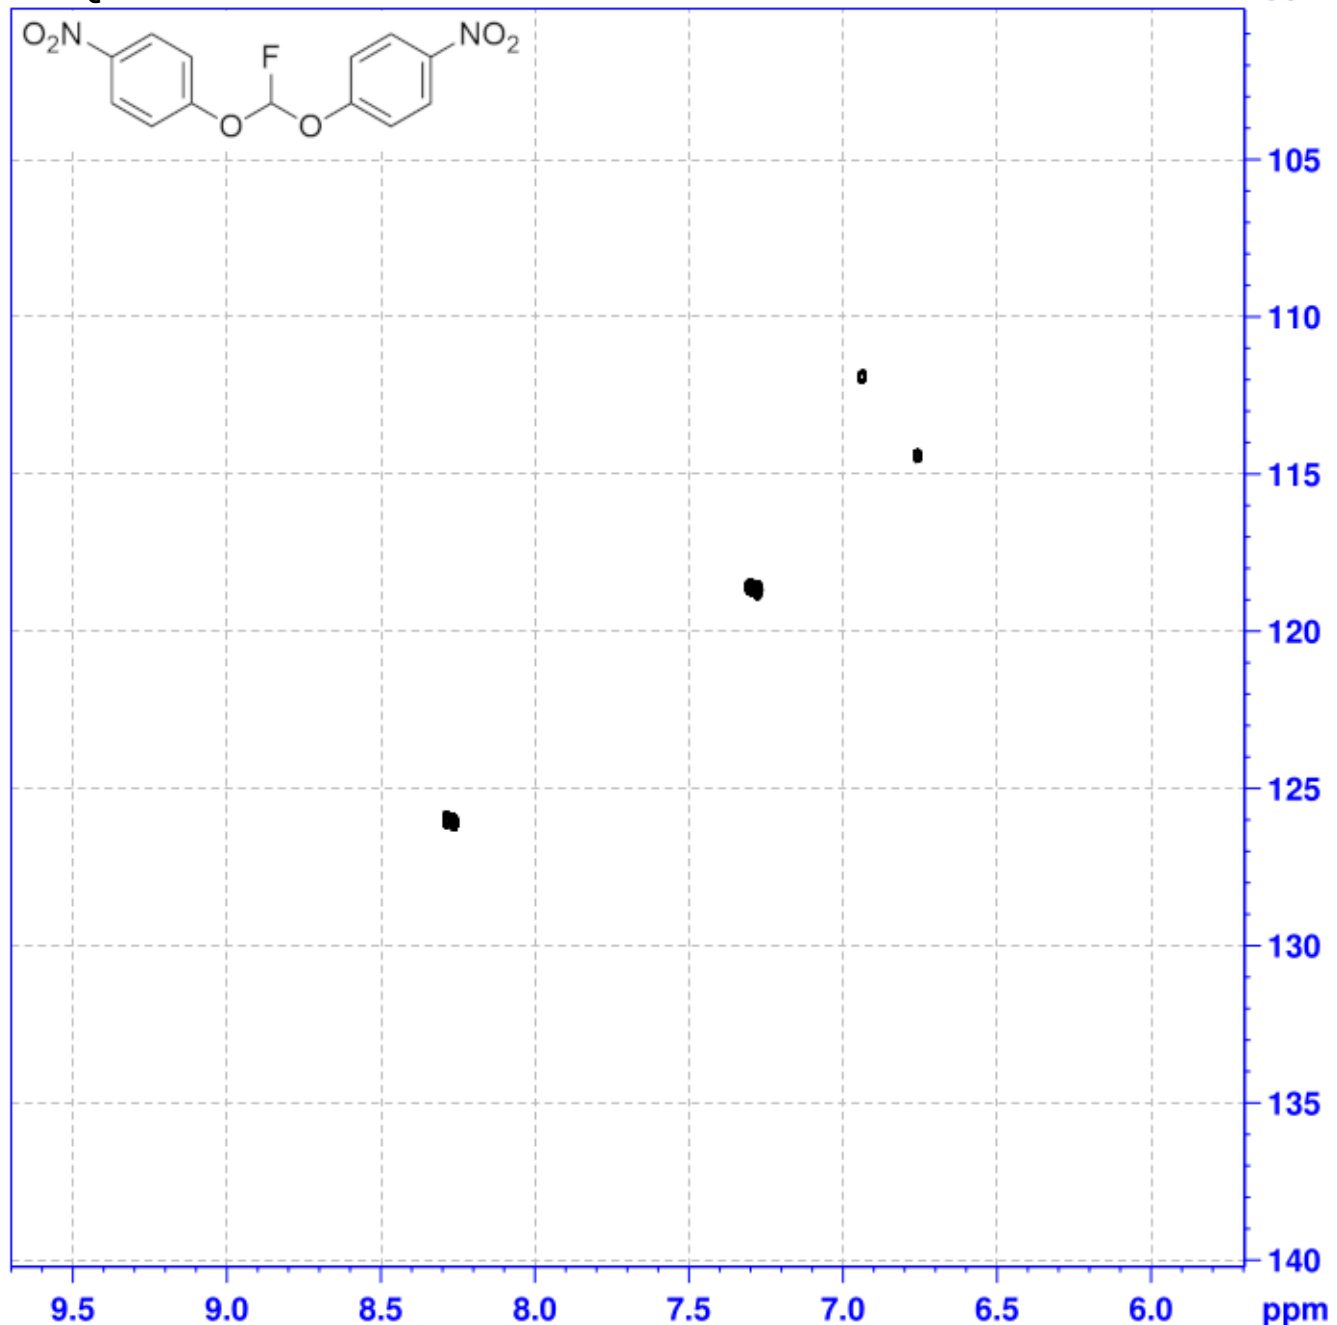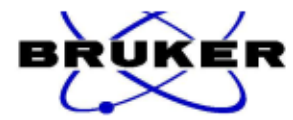

```

NAME          P7K1.2.21
EXPNO         5
PROCNO        1
Date_         20210201
Time          9.11
INSTRUM       spect
PROBHD        5 mm PABBO BB-
PULPROG       hmqcpgqf
TD            1024
SOLVENT       CDCl3
NS            4
DS            2
SWH           1602.564 Hz
FIDRES        1.565004 Hz
AQ            0.3195380 sec
RG            20642.5
DW            312.000 usec
DE            241.25 usec
TE            300.2 K
CNST2         145.0000000
D0            0.00000300 sec
D1            1.00000000 sec
D2            0.00344828 sec
D12           0.00002000 sec
D13           0.00000400 sec
D16           0.00020000 sec
IN0           0.00012425 sec

===== CHANNEL f1 =====
NUC1           1H
P1             10.50 usec
P2             21.00 usec
PL1            0.00 dB
SFO1          400.1030808 MHz

===== CHANNEL f2 =====
CPDPRG2       gaXp
NUC2           13C
P3             9.10 usec
PCPD2         55.00 usec
PL2            3.00 dB
PL12          18.40 dB
SFO2          100.6172986 MHz

----- GRADIENT CHANNEL -----
GPNAM1        sine.100
GPNAM2        sine.100
GPNAM3        sine.100
GPZ1          50.00 %
GPZ2          30.00 %
GPZ3          40.10 %
P16           1000.00 usec
ND0           2
TD            128
SFO1          100.6173 MHz
FIDRES        31.442905 Hz
SW            40.000 ppm
FnMODE        QF
SI            1024
SF            400.1000009 MHz
WDW           QSINE
SSB           0
LB            0.00 Hz
GB            0
PC            1.00
SI            512
MC2           QF
SF            100.6052043 MHz
WDW           QSINE
SSB           0
LB            0.00 Hz
GB            0
    
```
